# Supplementary material for: Design and synthesis of novel quinazolinones conjugated ibuprofen, indole acetamide, or thioacetohydrazide as selective COX-2 inhibitors: anti-inflammatory, analgesic and anticancer activities
Source: PubMed Central journal article supplement (PMC8330735; doi:10.1080/14756366.2021.1956912), 2021-08-01
Supplement: IENZ_A_1956912_SM5001.pdf [file IENZ_A_1956912_SM5001.pdf]

# Design and synthesis of novel quinazolinones conjugated ibuprofen, indole acetamide or thioacetohydrazide as selective COX-2 inhibitors: Anti-inflammatory, analgesic and anti-cancer activities

Asmaa Sakr<sup>a</sup>, Samar Rezq<sup>b,c,d,e,f</sup>, Samy M. Ibrahim<sup>a</sup>, Eman Soliman<sup>b</sup>, Mohamed M. Baraka<sup>a</sup>, Damian G. Romero<sup>c,d,e,f</sup> and Hend Kothayer<sup>a1</sup>

<sup>a</sup> Department of Medicinal Chemistry, Faculty of Pharmacy, Zagazig University, Egypt.

<sup>b</sup> Department of Pharmacology and Toxicology, Faculty of Pharmacy, Zagazig University, Egypt.

Departments of <sup>c</sup>Cell and Molecular Biology, <sup>d</sup>Mississippi Center for Excellence in Perinatal Research, <sup>e</sup>Women's Health Research Center, <sup>f</sup>Cardio Renal Research Center, University of Mississippi Medical Center, Jackson, MS, USA

**\*Correspondence:** Hend Kothayer, Department of Medicinal Chemistry, Faculty of Pharmacy, Zagazig University, 44511, Zagazig, Egypt.

E-mail: [hendo1311@hotmail.com](mailto:hendo1311@hotmail.com) or [HKElhamalawy@pharmacy.zu.edu.eg](mailto:HKElhamalawy@pharmacy.zu.edu.eg)

Tel.: 00201224578259

Fax: 0020552303266

**Keywords:** COX-2 inhibition; quinazolinone; anti-inflammatory; molecular modeling; Anticancer.

---

<sup>1</sup> Corresponding author. Tel. 00201224578259; E-mail: [hendo1311@hotmail.com](mailto:hendo1311@hotmail.com) or [hkelhamalawy@pharmacy.zu.edu.eg](mailto:hkelhamalawy@pharmacy.zu.edu.eg)

Asmaa Alaa\_H\_IN-1

Microanalytical Unit - FOPCU - NMR laboratory  
www.pharma.cu.edu.eg dir-mau.fopcu@pharma.cu.edu.eg

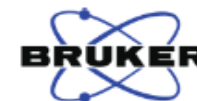

10.8963  
10.0646  
9.9742  
7.6521  
7.6326  
7.5986  
7.5795  
7.4862  
7.4751  
7.3690  
7.3490  
7.3288  
7.3108  
7.3078  
7.2909  
7.2872  
7.1047  
7.0868  
7.0674  
7.0194  
7.0009  
6.9825  
6.6735  
6.6527  
6.5812  
6.5626  
6.5441  
3.6259  
3.3524  
3.3475  
2.8100  
2.7919  
2.7796  
2.5141  
2.5098  
2.5055

Current Data Parameters  
NAME Asmaa Alaa\_H\_IN-1  
EXPNO 10  
PROCNO 1

F2 - Acquisition Parameters  
Date\_ 20171018  
Time 15.17  
INSTRUM spect  
PROBHD 5 mm PABBO BB/  
PULPROG zg30  
TD 65536  
SOLVENT DMSO  
NS 32  
DS 2  
SWH 8012.820 Hz  
FIDRES 0.122266 Hz  
AQ 4.0894465 sec  
RG 146.06  
DW 62.400 usec  
DE 6.50 usec  
TE 298.1 K  
D1 1.00000000 sec  
TDO 1

----- CHANNEL f1 -----  
SF01 400.1924713 MHz  
NUC1 1H  
P1 15.00 usec  
PLW1 10.39999962 W

F2 - Processing parameters  
SI 65536  
SF 400.1900000 MHz  
WDW EM  
SSB 0  
LB 0.30 Hz  
GB 0  
PC 1.00

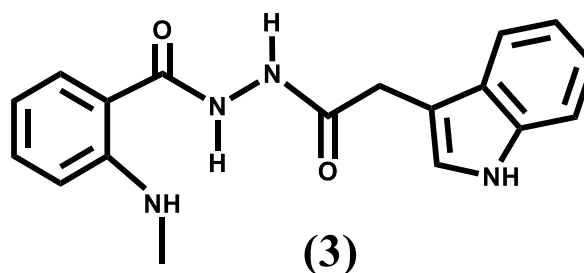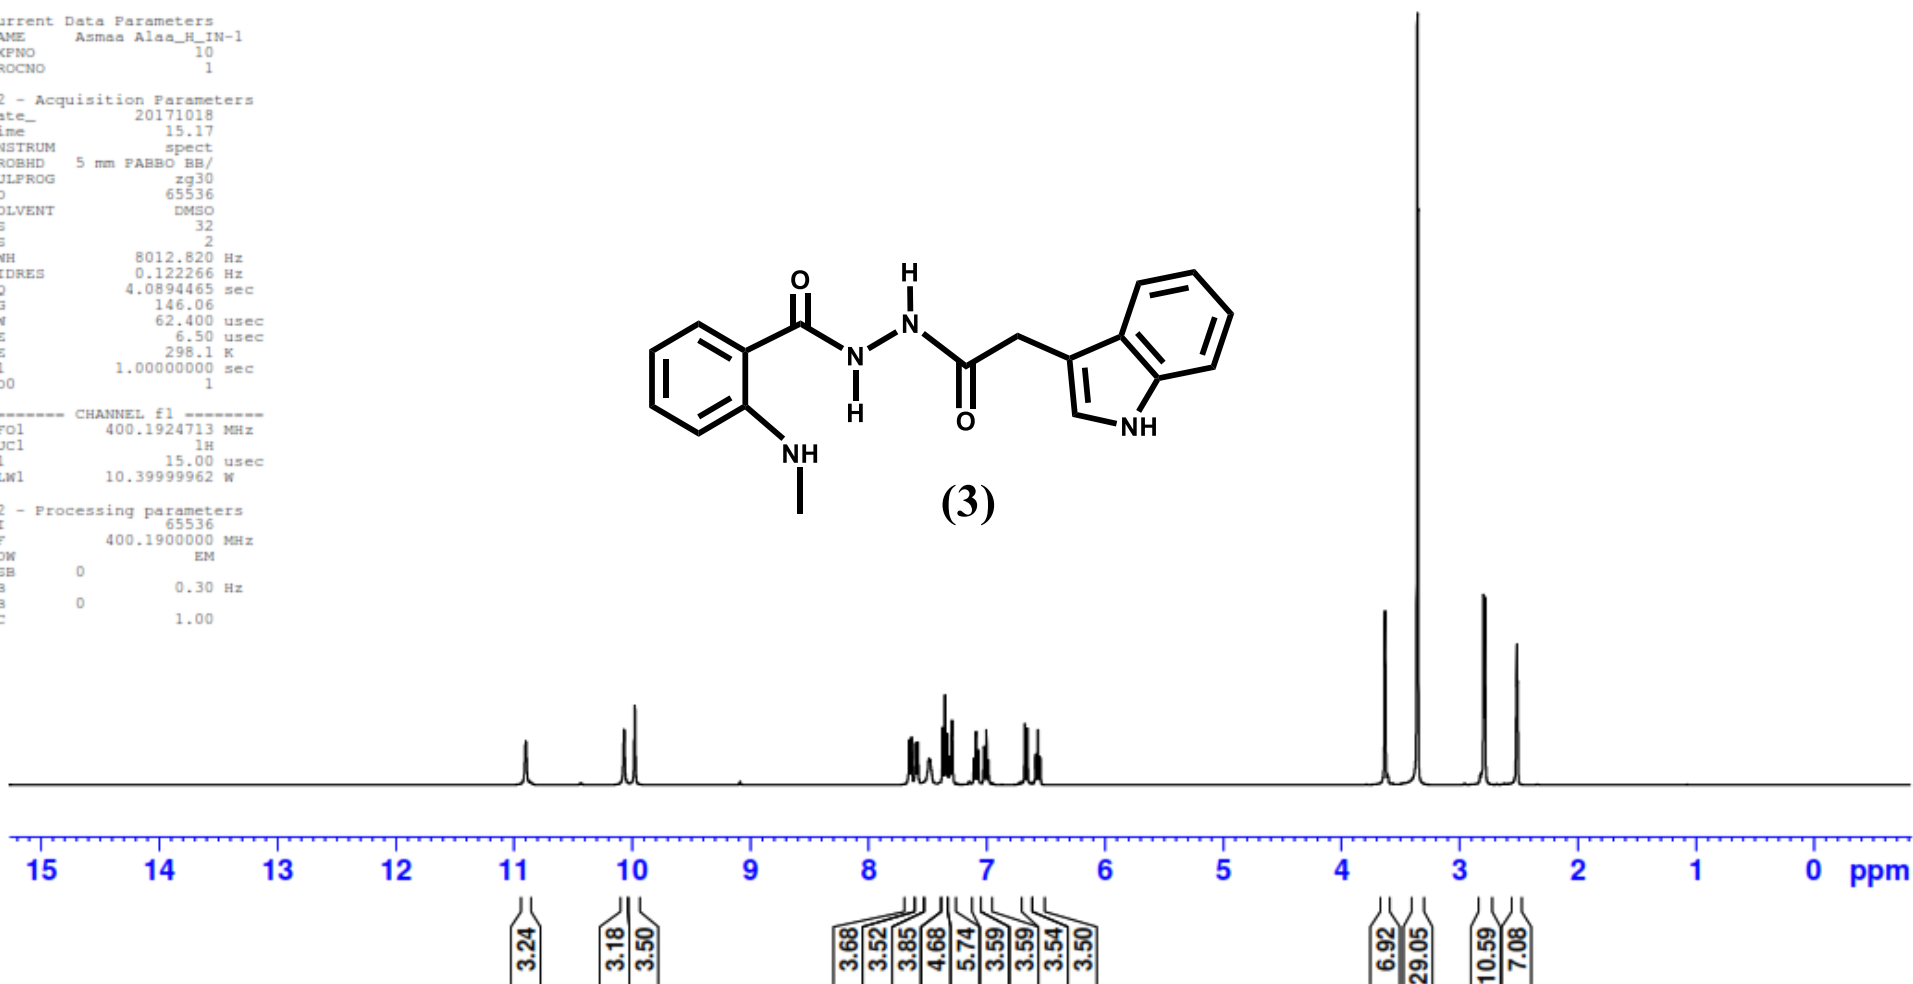

Asmaa Alaa\_H\_IN-1\_D2O

Microanalytical Unit - FOPCU - NMR laboratory  
www.pharma.cu.edu.eg dir-mau.fopcu@pharma.cu.edu.eg

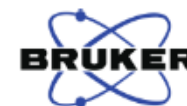

Current Data Parameters  
NAME Asmaa Alaa\_H\_IN-1\_D2O  
EXPNO 10  
PROCNO 1

F2 - Acquisition Parameters  
Date\_ 20171019  
Time 11.36  
INSTRUM spect  
PROBHD 5 mm FAPBO BB/  
PULPROG zg30  
TD 65536  
SOLVENT DMSO  
NS 32  
DS 2  
SWH 8012.820 Hz  
FIDRES 0.122266 Hz  
AQ 4.0894465 sec  
RG 129.43  
DW 62.400 usec  
DE 6.50 usec  
TE 298.0 K  
D1 1.00000000 sec  
TD0 1

----- CHANNEL f1 -----  
SF01 400.1924713 MHz  
NUC1 1H  
P1 15.00 usec  
PLW1 10.39999962 W

F2 - Processing parameters  
SI 65536  
SF 400.1900000 MHz  
WDW EM  
SSB 0  
LB 0.30 Hz  
GB 0  
PC 1.00

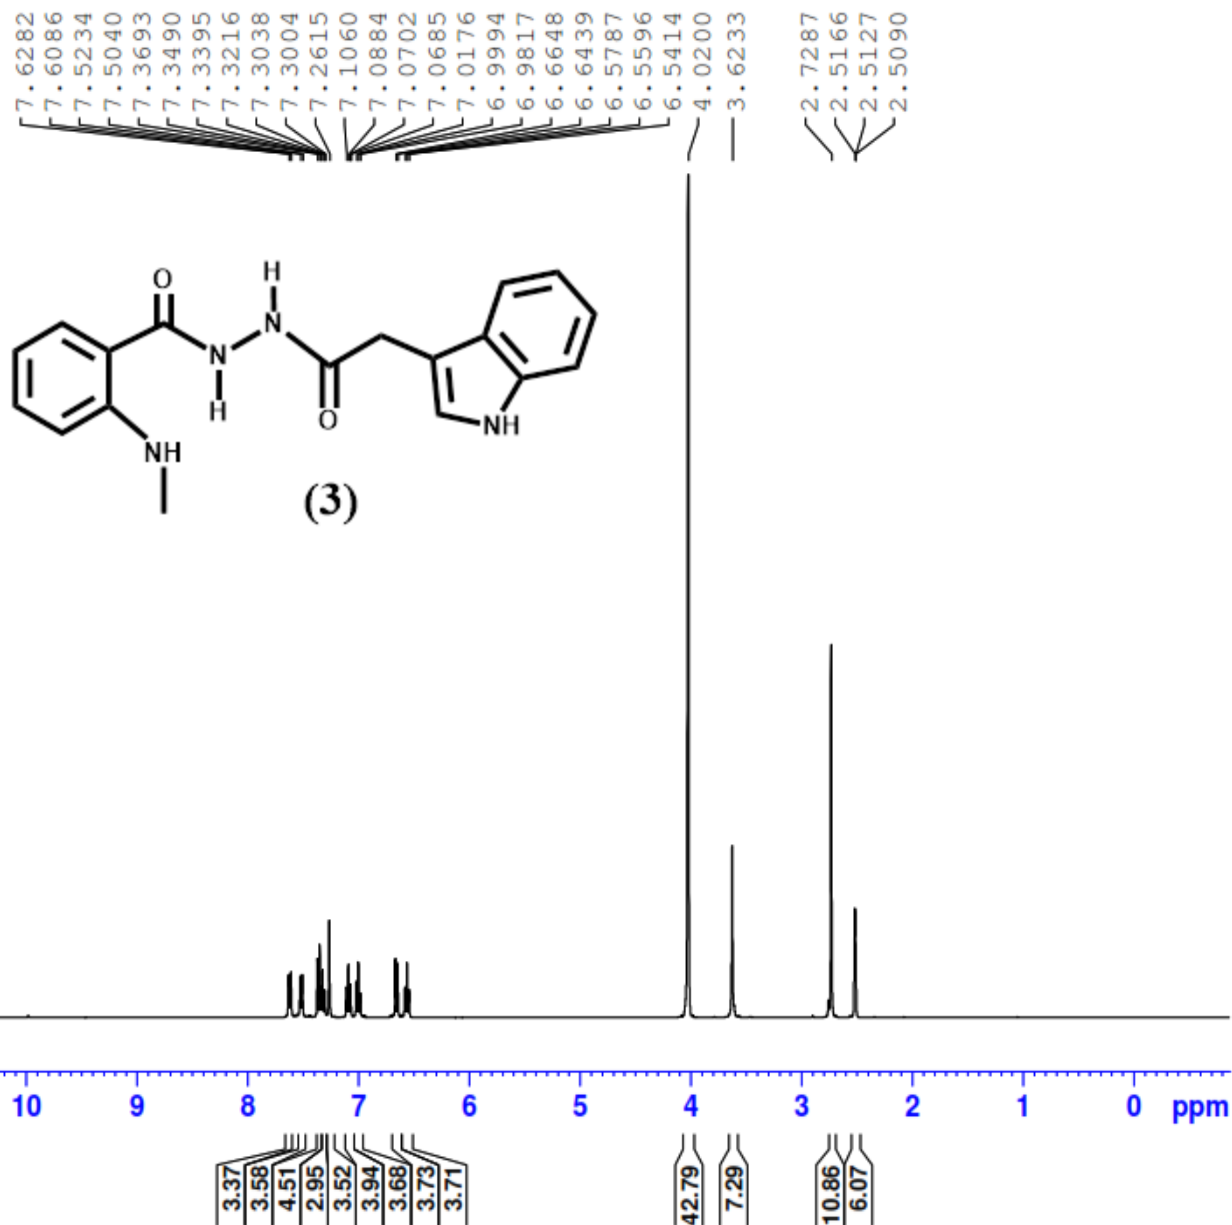

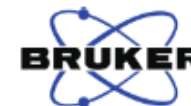

10.9025  
 10.4296  
 7.8125  
 7.8097  
 7.7935  
 7.7907  
 7.5265  
 7.5069  
 7.4653  
 7.4619  
 7.4444  
 7.4264  
 7.4229  
 7.4084  
 7.3874  
 7.3736  
 7.3533  
 7.2391  
 7.2180  
 7.1116  
 7.0932  
 7.0746  
 7.0012  
 6.9822  
 6.9642  
 6.8820  
 6.8633  
 6.8448  
 6.7170  
 6.6962  
 5.7846  
 3.5863  
 3.5740  
 3.3519  
 2.7662  
 2.5133  
 2.5094

Current Data Parameters  
 NAME Asmaa Alaa\_H\_B-S30  
 EXPNO 10  
 PROCNO 1

F2 - Acquisition Parameters  
 Date\_ 20180423  
 Time 7.26  
 INSTRUM spect  
 PROBHD 5 mm FAPBO BB/  
 PULPROG zg30  
 TD 65536  
 SOLVENT DMSO  
 NS 32  
 DS 2  
 SWH 8012.820 Hz  
 FIDRES 0.122266 Hz  
 AQ 4.0894465 sec  
 RG 106.37  
 DW 62.400 usec  
 DE 6.50 usec  
 TE 298.1 K  
 D1 1.00000000 sec  
 TD0 1

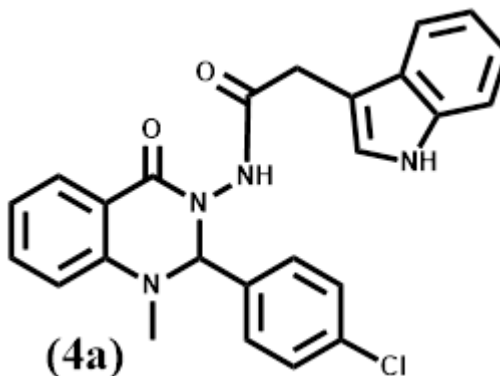

----- CHANNEL f1 -----  
 SFO1 400.1924713 MHz  
 NUC1 1H  
 F1 15.00 usec  
 PLW1 10.39999962 W

F2 - Processing parameters  
 SI 65536  
 SF 400.1900000 MHz  
 WDW EM  
 SSB 0  
 LB 0.30 Hz  
 GB 0  
 PC 1.00

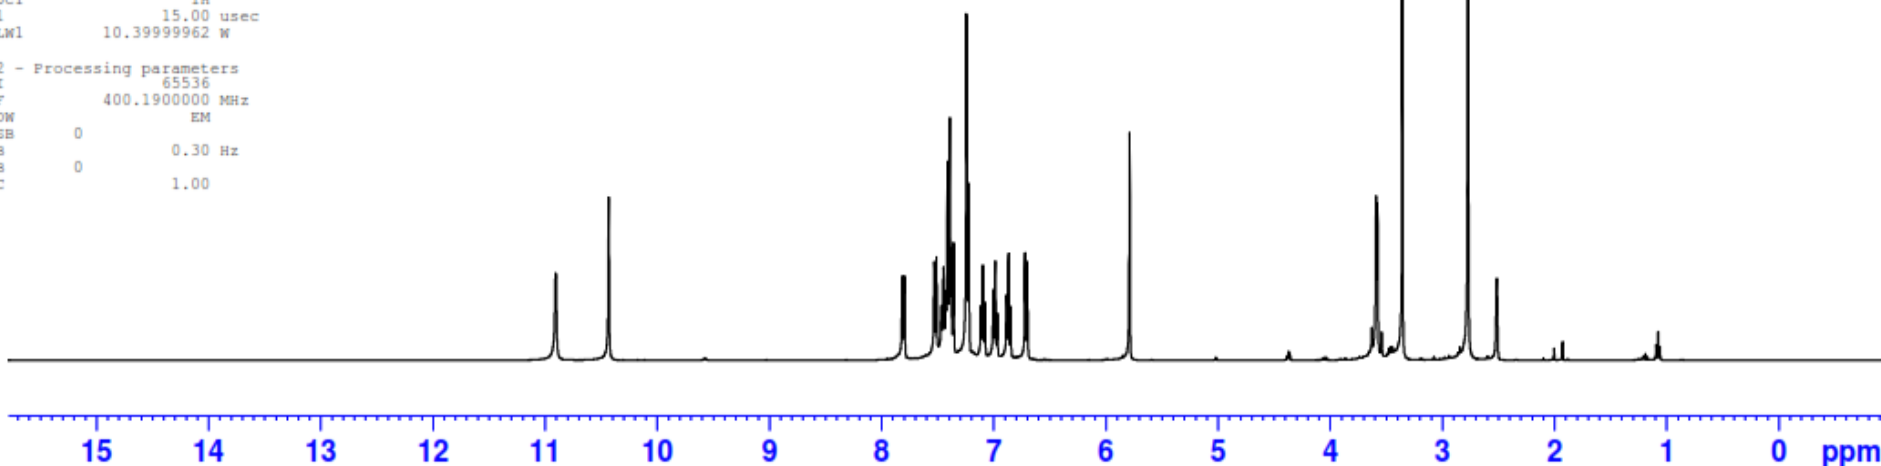

3.57  
 3.71

4.07  
 5.04  
 18.62  
 12.37  
 4.32  
 4.21  
 4.27  
 4.02  
 3.93

8.03  
 9.50  
 11.59  
 2.73

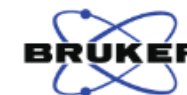

170.13  
 160.85  
 147.03  
 136.51  
 136.45  
 135.13  
 134.19  
 129.05  
 128.99  
 128.50  
 127.59  
 124.41  
 121.50  
 119.17  
 118.83  
 118.46  
 115.03  
 112.90  
 111.76  
 108.28  
 79.37  
 40.50  
 40.30  
 40.09  
 39.88  
 39.67  
 39.46  
 39.25  
 35.47  
 30.80

Current Data Parameters  
 NAME Asmaa Sakr\_C\_B-S30  
 EXPNO 10  
 PROCNO 1

F2 - Acquisition Parameters  
 Date\_ 20180510  
 Time 2.31  
 INSTRUM spect  
 PROBHD 5 mm PABBO BB/  
 PULPROG zgpg30  
 TD 65536  
 SOLVENT DMSO  
 NS 1200  
 DS 4  
 SWH 24038.461 Hz  
 FIDRES 0.366798 Hz  
 AQ 1.3631488 sec  
 RG 202.37  
 DW 20.800 usec  
 DE 6.50 usec  
 TE 298.0 K  
 D1 2.00000000 sec  
 D11 0.03000000 sec  
 TDO 1

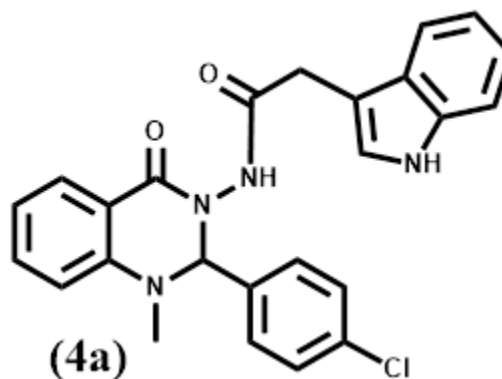

==== CHANNEL f1 =====  
 SFO1 100.6379178 MHz  
 NUC1 13C  
 P1 10.00 usec  
 PLW1 45.00000000 W  
 ===== CHANNEL f2 =====  
 SFO2 400.1916008 MHz  
 NUC2 1H  
 CPDPRG[2] waltz16

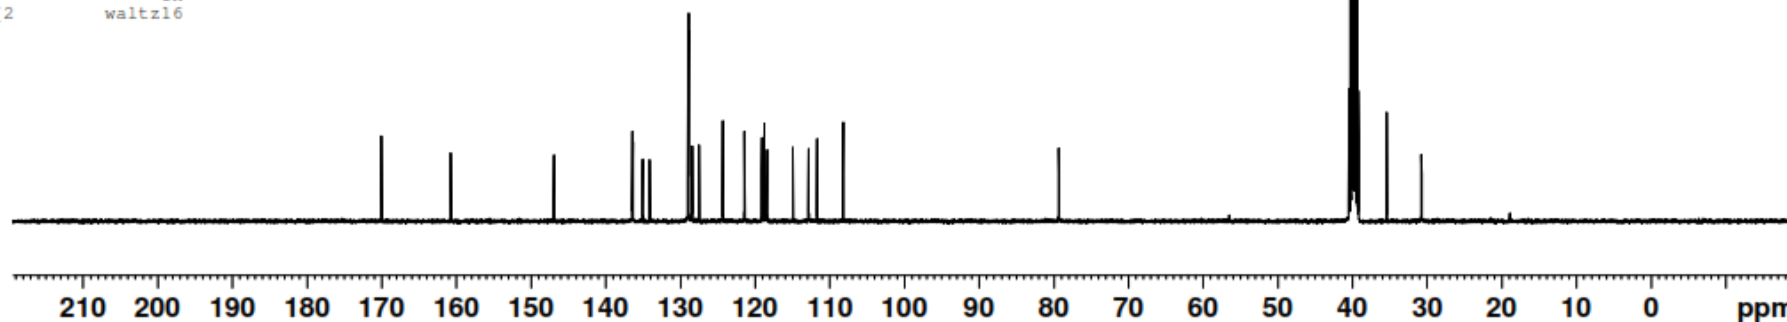

Asmaa Alaa\_H\_B-S11

Microanalytical Unit - FOPCU - NMR laboratory  
www.pharma.cu.edu.eg dir-mau.fopcu@pharma.cu.edu.eg

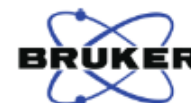

10.8950  
10.4802  
8.1690  
8.1473  
7.8285  
7.8252  
7.8094  
7.8060  
7.5019  
7.4915  
7.4844  
7.4697  
7.3632  
7.3430  
7.2238  
7.2190  
7.0995  
7.0815  
7.0633  
6.9747  
6.9558  
6.9379  
6.9118  
6.8932  
6.8749  
6.7487  
6.7280  
5.9649  
3.5715  
3.5660  
3.3479  
2.8034  
2.5139  
2.5099  
2.5060

Current Data Parameters  
NAME Asmaa Alaa\_H\_B-S11  
EXPNO 10  
PROCNO 1

F2 - Acquisition Parameters  
Date\_ 20171126  
Time 14.42  
INSTRUM spect  
PROBHD 5 mm PABBO BB/  
PULPROG zg30  
TD 65536  
SOLVENT DMSO  
NS 32  
DS 2  
SWH 8012.820 Hz  
FIDRES 0.122266 Hz  
AQ 4.0894465 sec  
RG 146.06  
DW 62.400 usec  
DE 6.50 usec  
TE 298.1 K  
D1 1.00000000 sec  
D10 1

----- CHANNEL f1 -----  
SF01 400.1924713 MHz  
NUC1 1H  
P1 15.00 usec  
PLM1 10.39999962 W

F2 - Processing parameters  
SI 65536  
SF 400.1900000 MHz  
WDW EM  
SSB 0  
LB 0.30 Hz  
GB 0  
PC 1.00

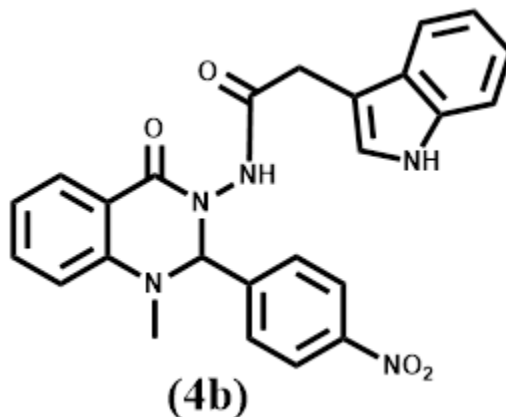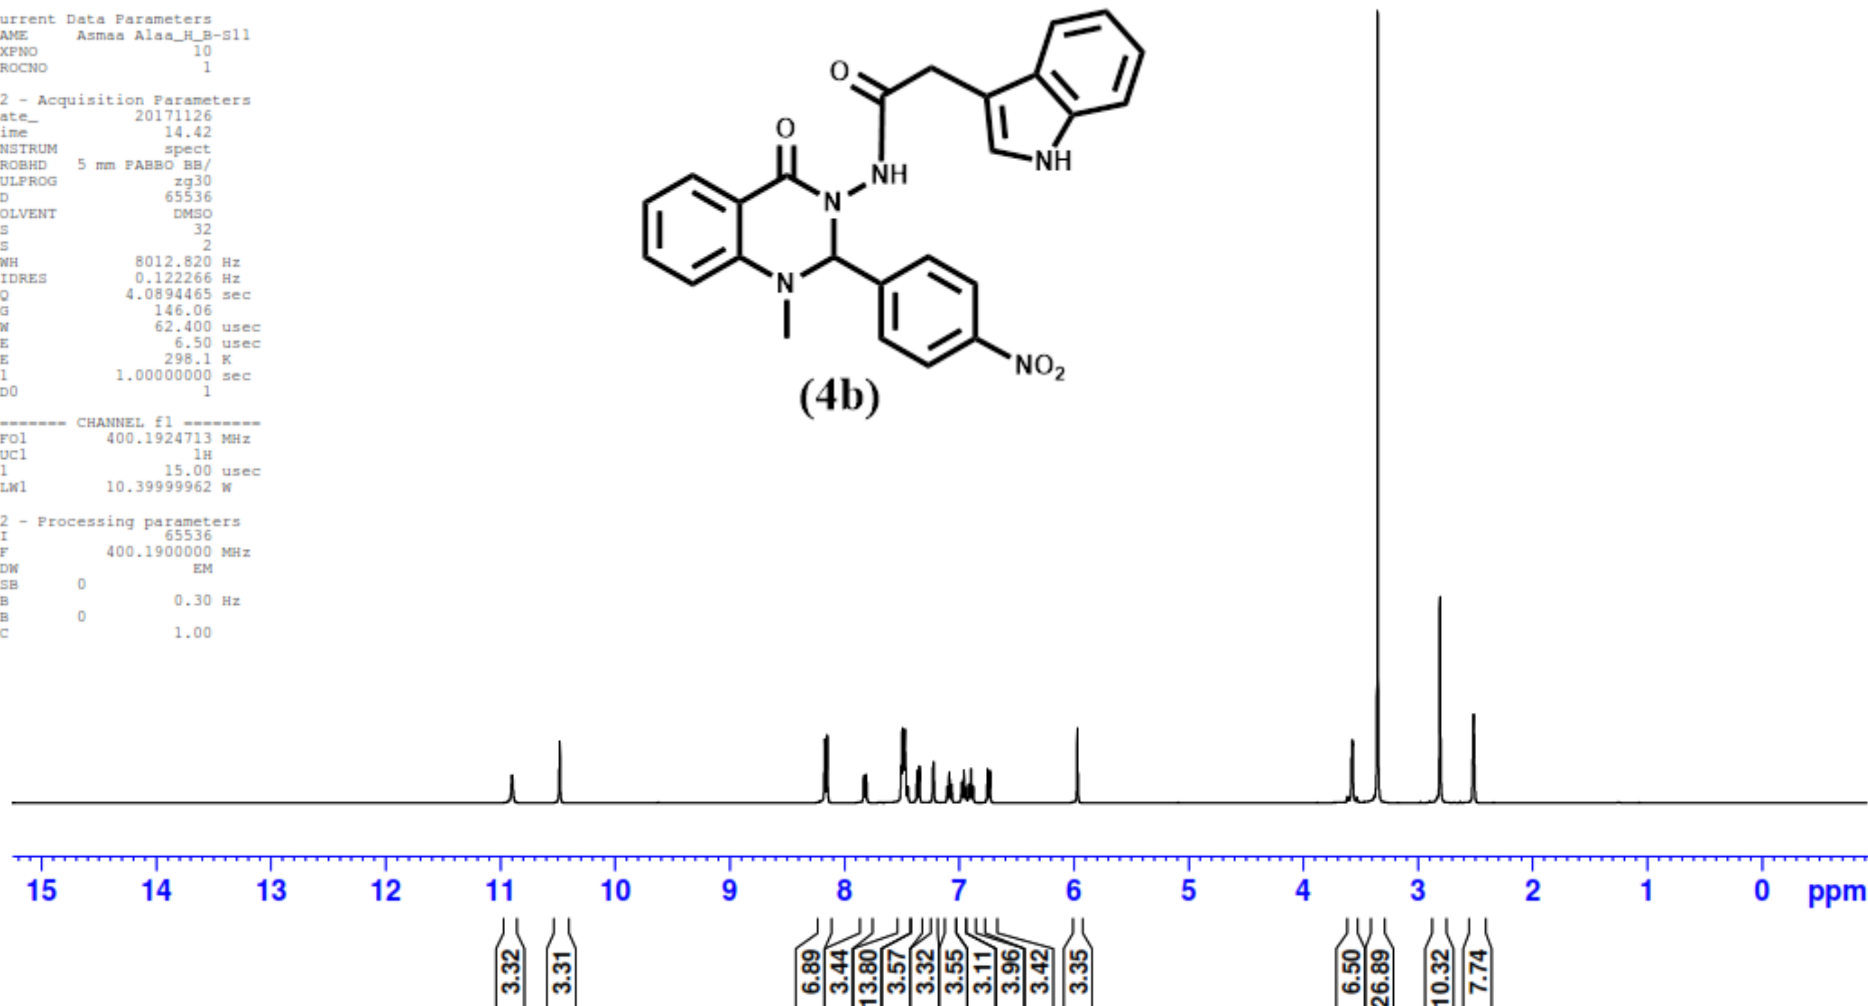

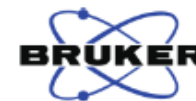

7.9958  
 7.9742  
 7.7715  
 7.7523  
 7.4518  
 7.4313  
 7.4090  
 7.4020  
 7.3821  
 7.3649  
 7.3430  
 7.3215  
 7.1566  
 7.0696  
 7.0508  
 7.0319  
 6.9266  
 6.9076  
 6.8871  
 6.8669  
 6.8482  
 6.7121  
 6.6912  
 5.8142  
 4.1105  
 3.5386  
 3.5345  
 2.6857  
 2.5127

Current Data Parameters  
 NAME Asmaa Alaa\_H\_B-S11\_D2O  
 EXPNO 10  
 PROCNO 1

F2 - Acquisition Parameters  
 Date\_ 20171210  
 Time 14.18  
 INSTRUM spect  
 PROBHD 5 mm FAPBO BB/  
 PULPROG zg30  
 TD 65536  
 SOLVENT DMSO  
 NS 32  
 DS 2  
 SWH 8012.820 Hz  
 FIDRES 0.122266 Hz  
 AQ 4.0894465 sec  
 RG 106.37  
 DM 62.400 usec  
 DE 6.50 usec  
 TE 298.0 K  
 D1 1.00000000 sec  
 TD0 1

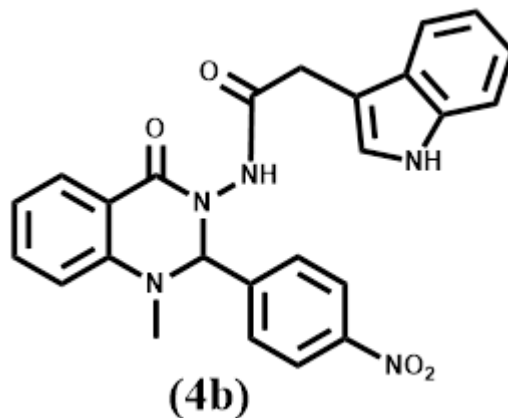

----- CHANNEL f1 -----  
 SF01 400.1924713 MHz  
 NUC1 1H  
 F1 15.00 usec  
 PLM1 10.39999962 W

F2 - Processing parameters  
 SI 65536  
 SF 400.1900000 MHz  
 MDM EM  
 SSB 0  
 LB 0.30 Hz  
 GB 0  
 PC 1.00

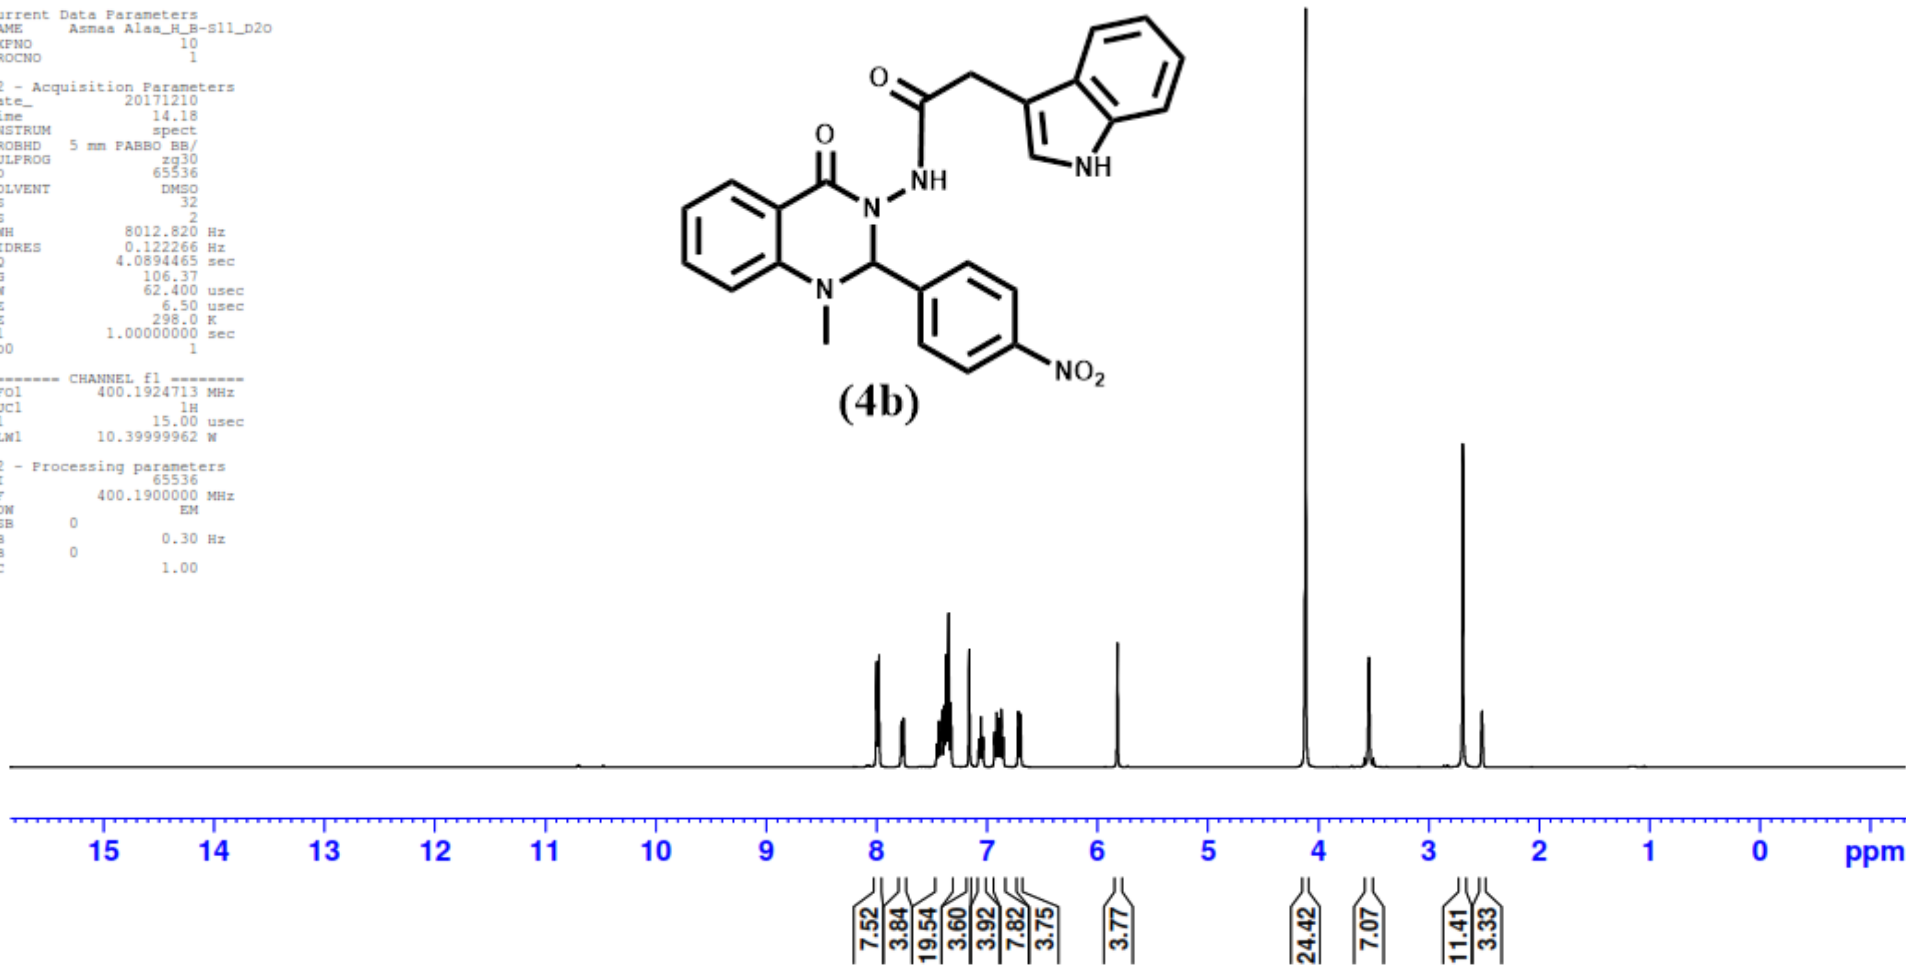

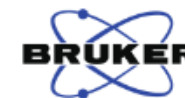

— 170.15 — 160.74 — 148.34 — 146.91 — 144.59 — 136.51 — 135.20 — 128.61 — 128.56 — 127.58 — 124.40 — 124.18 — 121.47 — 119.13 — 118.78 — 115.14 — 113.16 — 111.75 — 108.20 — 79.06 — 40.61 — 40.40 — 40.20 — 39.99 — 39.78 — 39.57 — 39.36 — 35.61 — 30.85

Current Data Parameters  
 NAME Asmaa Alaa\_C\_B-S11  
 EXPNO 10  
 PROCNO 1

F2 - Acquisition Parameters  
 Date\_ 20171207  
 Time\_ 16.47  
 INSTRUM spect  
 PROBHD 5 mm PABBO BB/  
 PULPROG zgpg30  
 TD 65536  
 SOLVENT DMSO  
 NS 1200  
 DS 4  
 SWH 24038.461 Hz  
 FIDRES 0.366798 Hz  
 AQ 1.3631488 sec  
 RG 202.37  
 DW 20.800 usec  
 DE 6.50 usec  
 TE 298.1 K  
 D1 2.00000000 sec  
 D11 0.03000000 sec  
 TDO 1

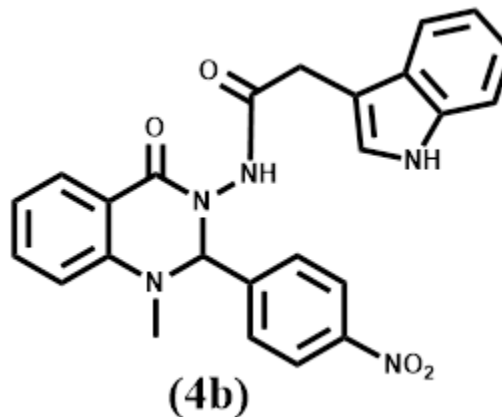

==== CHANNEL f1 =====  
 SFO1 100.6379178 MHz  
 NUC1 13C  
 P1 10.00 usec  
 PLW1 45.00000000 W  
 ===== CHANNEL f2 =====  
 SFO2 400.1916008 MHz  
 NUC2 1H  
 CPDPRG[2] waltz16

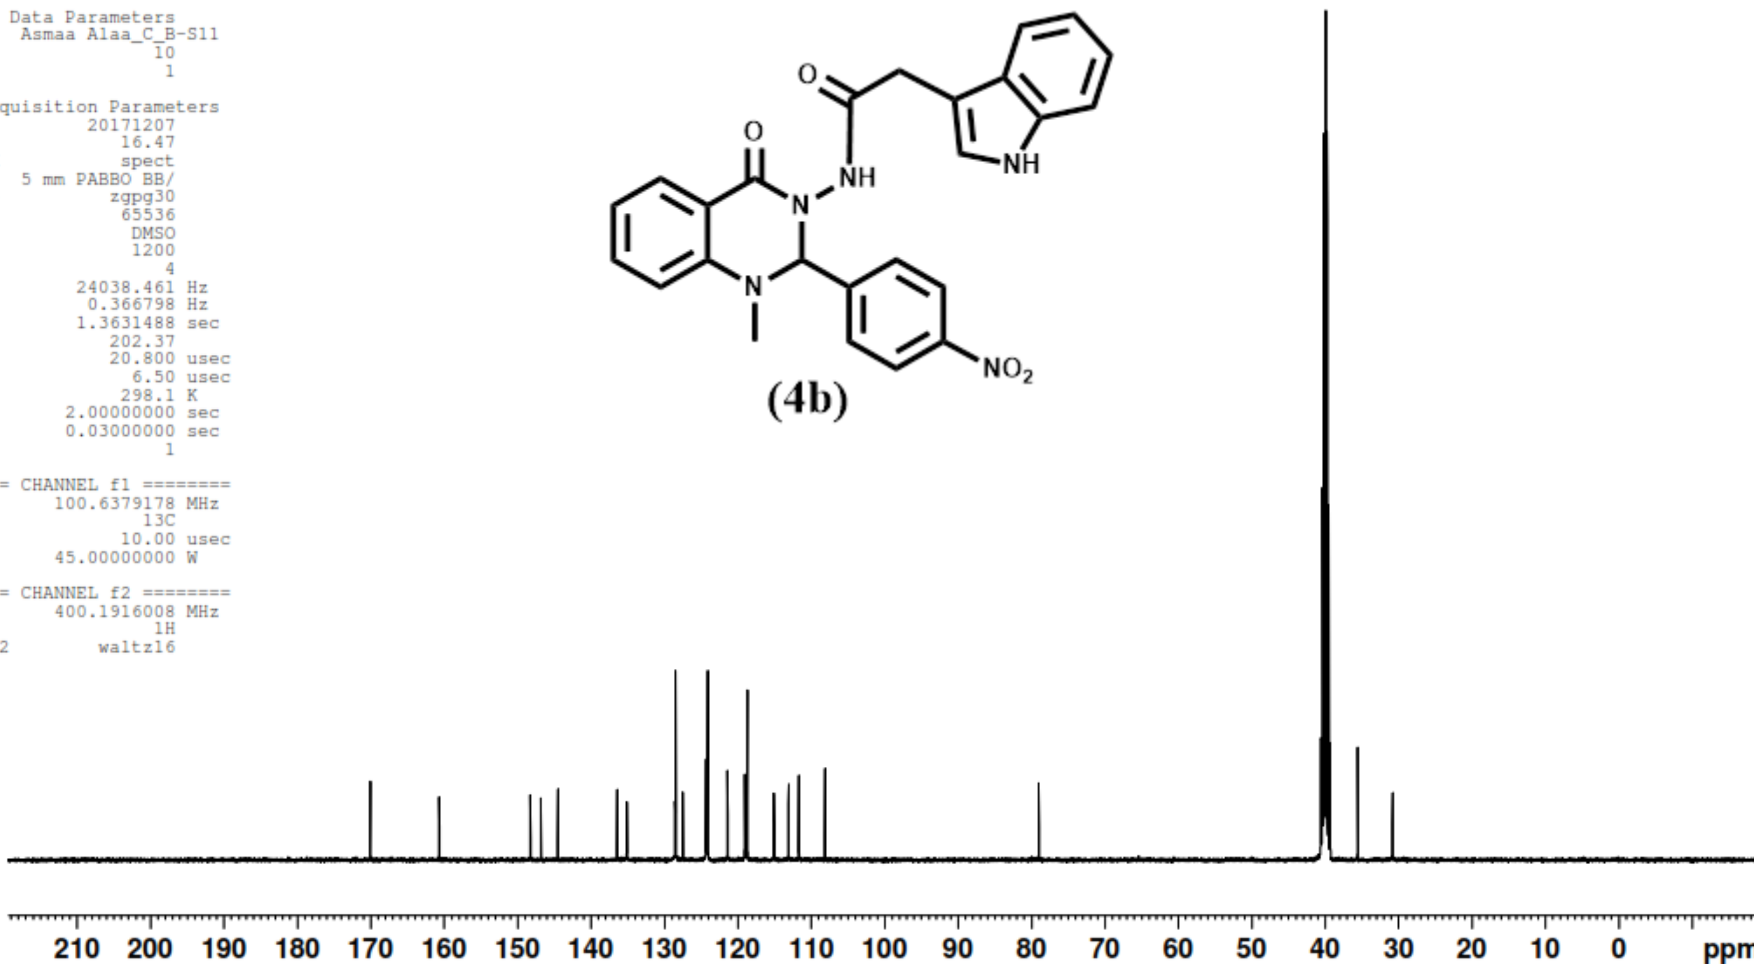



Asmaa Alaa\_H\_B-S31

Microanalytical Unit - FOPCU - NMR laboratory  
www.pharma.cu.edu.eg dir-mau.fopcu@pharma.cu.edu.eg

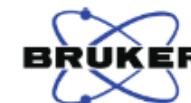

10.8999  
10.3927  
7.8108  
7.8076  
7.7917  
7.7885  
7.5456  
7.5260  
7.4509  
7.4472  
7.4297  
7.4121  
7.4084  
7.3753  
7.3545  
7.2369  
7.2320  
7.1448  
7.1232  
7.0946  
7.0751  
7.0062  
6.9878  
6.9694  
6.8879  
6.8660  
6.8440  
6.8253  
6.6947  
6.6740  
5.6871  
3.7393  
3.5928  
3.5746  
3.3552  
2.7354  
2.5095

Current Data Parameters  
NAME Asmaa Alaa\_H\_B-S31  
EXPNO 10  
PROCNO 1

F2 - Acquisition Parameters  
Date\_ 20180423  
Time 7.21  
INSTRUM spect  
PROBHD 5 mm PABBO BB/  
PULPROG zg30  
TD 65536  
SOLVENT DMSO  
NS 32  
DS 2  
SMH 8012.820 Hz  
FIDRES 0.122266 Hz  
AQ 4.0894465 sec  
RG 91.58  
DW 62.400 usec  
DE 6.50 usec  
TE 298.0 K  
D1 1.00000000 sec  
TD0 1

----- CHANNEL f1 -----  
SF01 400.1924713 MHz  
NUC1 1H  
P1 15.00 usec  
PLW1 10.39999962 W

F2 - Processing parameters  
SI 65536  
SF 400.1900000 MHz  
WDW EM  
SSB 0  
LB 0.30 Hz  
GB 0  
PC 1.00

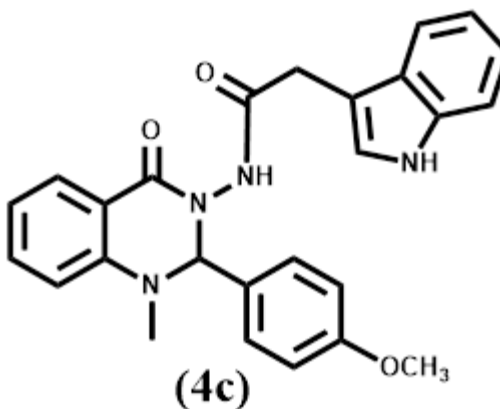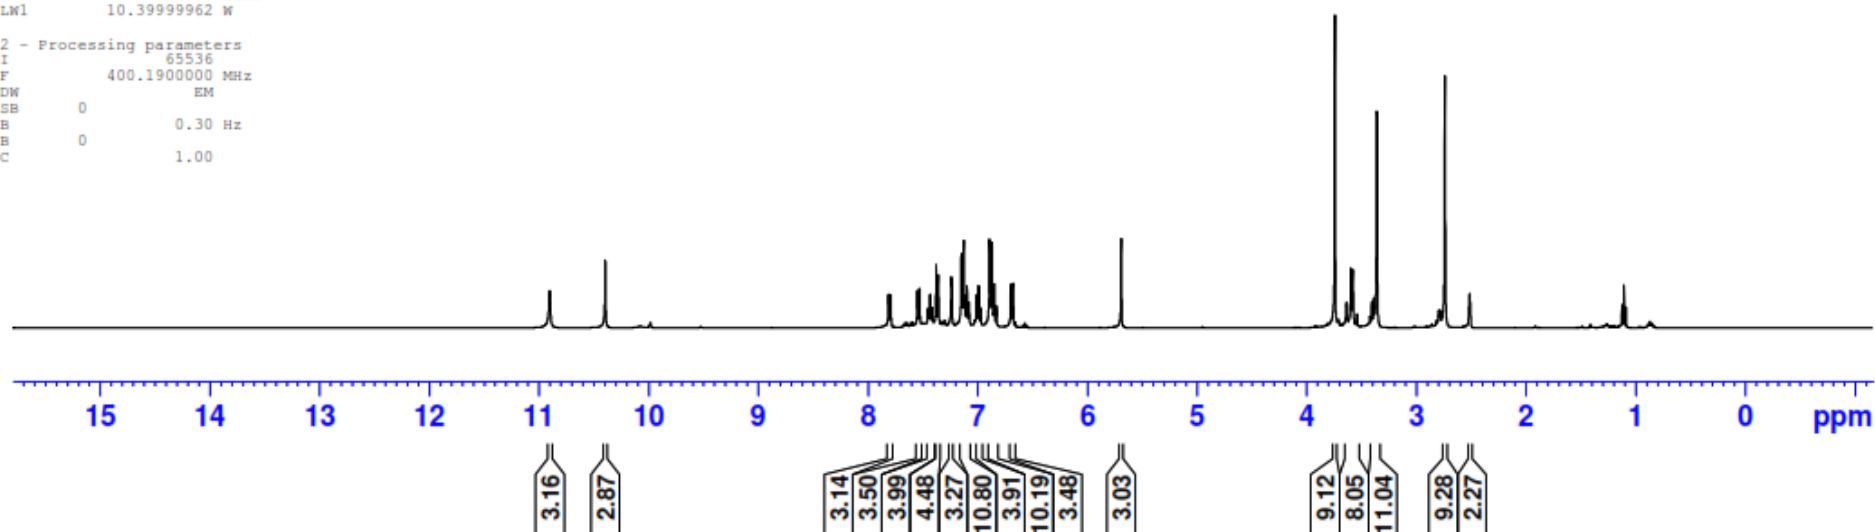

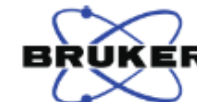

Current Data Parameters  
 NAME Asmaa Sakr\_H\_B-S31\_D20  
 EXPNO 10  
 PROCNO 1

F2 - Acquisition Parameters  
 Date\_ 20180510  
 Time 11.41  
 INSTRUM spect  
 PROBHD 5 mm PABBO BB/  
 PULPROG zg30  
 TD 65536  
 SOLVENT DMSO  
 NS 32  
 DS 2  
 SWH 8012.820 Hz  
 FIDRES 0.122266 Hz  
 AQ 4.0894465 sec  
 RG 50.83  
 DM 62.400 usec  
 DE 6.50 usec  
 TE 298.1 K  
 D1 1.00000000 sec  
 TD0 1

----- CHANNEL f1 -----  
 SFO1 400.1924713 MHz  
 NUC1 1H  
 P1 15.00 usec  
 PLW1 10.39999962 W

F2 - Processing parameters  
 S1 65536  
 SF 400.1900000 MHz  
 MDW EM  
 SSB 0  
 LB 0.30 Hz  
 GB 0  
 PC 1.00

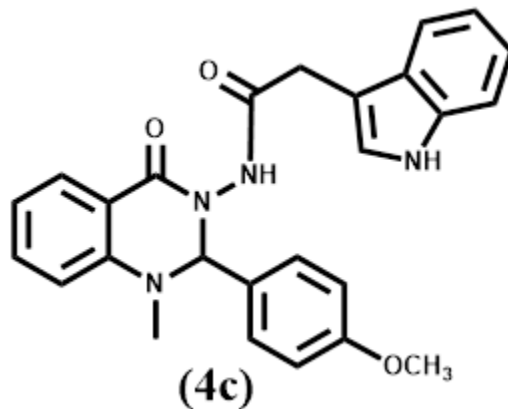

7.7620  
 7.7596  
 7.7429  
 7.4742  
 7.4545  
 7.4146  
 7.3674  
 7.3472  
 7.1771  
 7.0859  
 7.0596  
 7.0380  
 6.9659  
 6.8340  
 6.8146  
 6.8035  
 6.7820  
 6.6685  
 6.6477  
 5.5771  
 4.0674  
 3.6762  
 3.5676  
 3.5498  
 2.7177  
 2.6599  
 2.5121

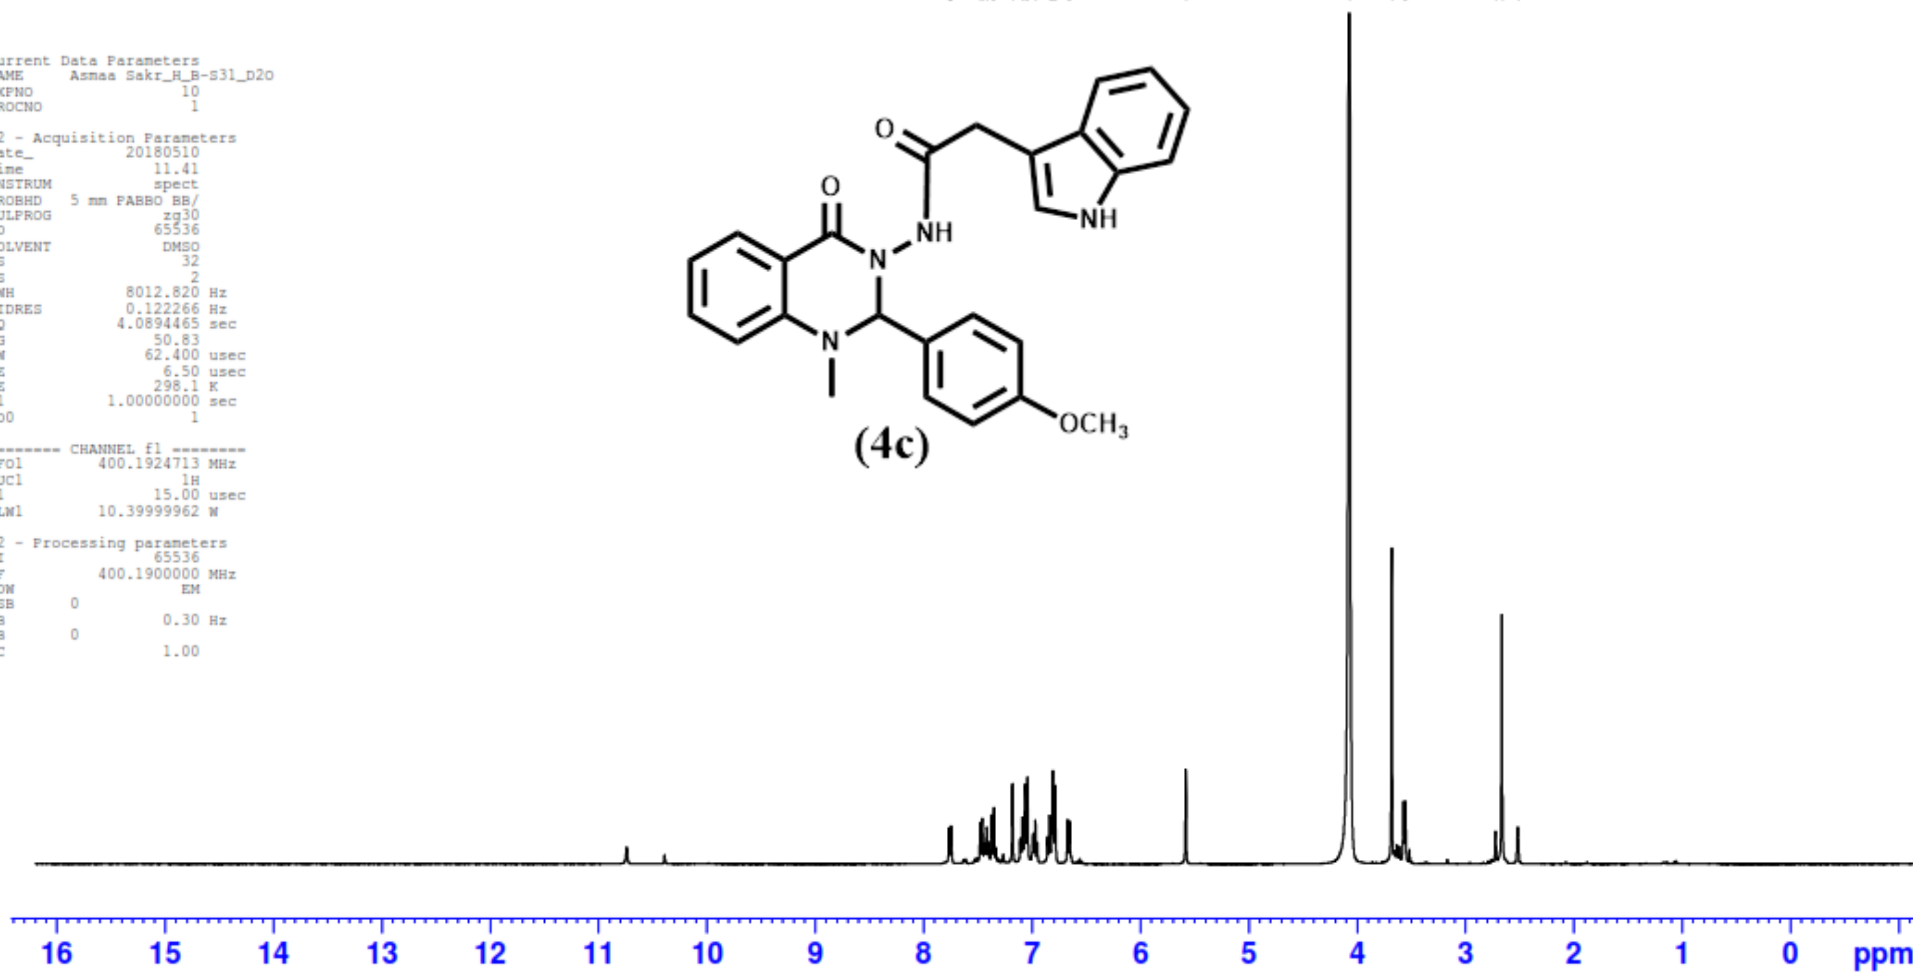

1.64  
 4.91  
 7.23  
 5.59  
 1.28  
 67.86  
 4.58  
 2.43  
 4.30

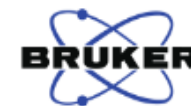

170.07  
 161.00  
 160.23  
 147.24  
 136.51  
 135.00  
 129.53  
 128.79  
 128.44  
 127.61  
 124.39  
 121.49  
 119.21  
 118.82  
 118.15  
 115.07  
 114.34  
 112.71  
 111.75  
 108.39  
 79.74  
 55.58  
 40.49  
 40.28  
 40.07  
 39.86  
 39.65  
 39.44  
 39.24  
 35.38  
 30.76

Current Data Parameters  
 NAME Asmaa Sakr\_C\_B-S31  
 EXPNO 10  
 PROCNO 1

F2 - Acquisition Parameters  
 Date\_ 20180510  
 Time 1.20  
 INSTRUM spect  
 PROBHD 5 mm PABBO BB/  
 PULPROG zgpg30  
 TD 65536  
 SOLVENT DMSO  
 NS 1200  
 DS 4  
 SWH 24038.461 Hz  
 FIDRES 0.366798 Hz  
 AQ 1.3631488 sec  
 RG 202.37  
 DW 20.800 usec  
 DE 6.50 usec  
 TE 298.1 K  
 D1 2.00000000 sec  
 D11 0.03000000 sec  
 TD0 1

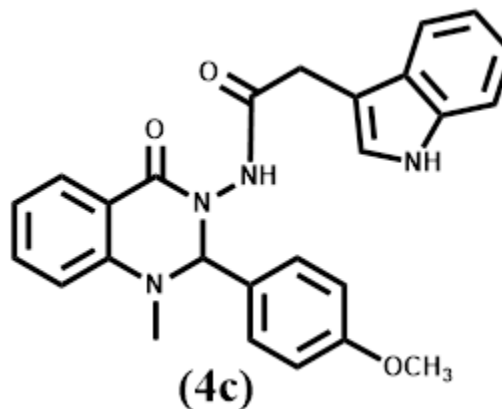

==== CHANNEL f1 =====  
 SFO1 100.6379178 MHz  
 NUC1 13C  
 P1 10.00 usec  
 PLW1 45.00000000 W

==== CHANNEL f2 =====  
 SFO2 400.1916008 MHz  
 NUC2 1H  
 CPDPRG[2] waltz16

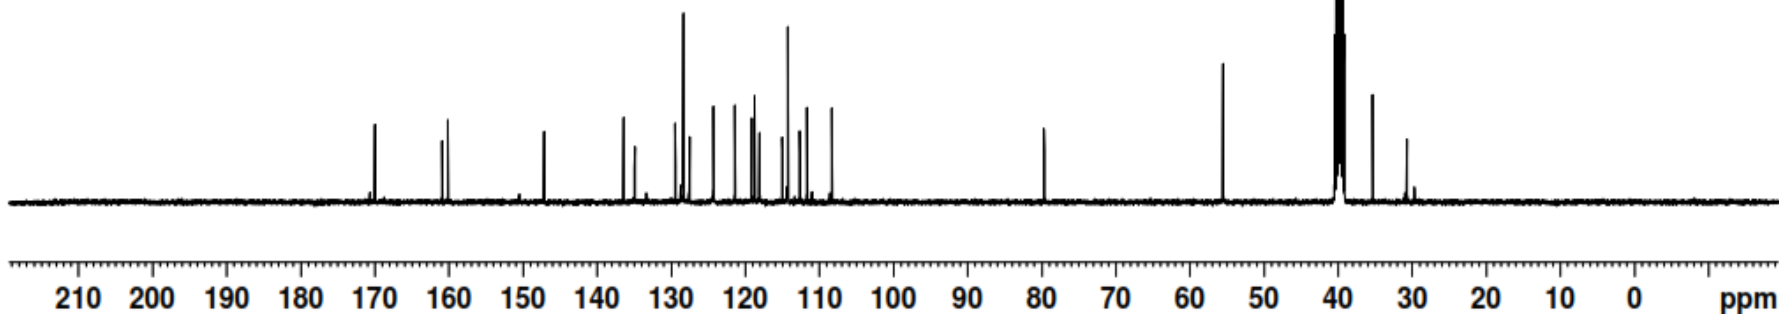

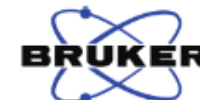

10.0481  
 9.9730  
 7.5902  
 7.5715  
 7.5105  
 7.4990  
 7.3436  
 7.3234  
 7.3050  
 7.2852  
 7.1191  
 7.0991  
 6.6696  
 6.6487  
 6.5682  
 6.5496  
 6.5311  
 3.7400  
 3.7228  
 3.7052  
 3.6879  
 3.3379  
 2.7902  
 2.7780  
 2.5137  
 2.5099  
 2.5060  
 2.4325  
 2.4147  
 1.8368  
 1.8199  
 1.8032  
 1.7863  
 1.4007  
 1.3832  
 0.8784  
 0.8619

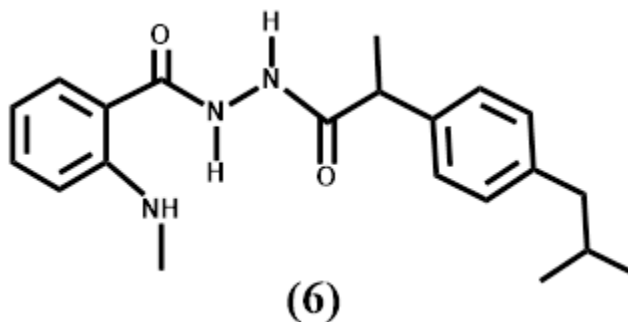

Current Data Parameters  
 NAME Asmaa Alaa\_H\_IN2  
 EXPNO 10  
 PROCNO 1

F2 - Acquisition Parameters  
 Date\_ 20171107  
 Time 14.42  
 INSTRUM spect  
 PROBHD 5 mm FAPBO BB/  
 PULPROG zg30  
 TD 65536  
 SOLVENT DMSO  
 NS 32  
 DS 2  
 SMH 8012.820 Hz  
 FIDRES 0.122266 Hz  
 AQ 4.0894465 sec  
 RG 114.95  
 DM 62.400 usec  
 DE 6.50 usec  
 TE 298.0 K  
 D1 1.00000000 sec  
 TDO 1

----- CHANNEL f1 -----  
 SF01 400.1924713 MHz  
 NUCL 1H  
 P1 15.00 usec  
 PLW1 10.39999962 W

F2 - Processing parameters  
 SI 65536  
 SF 400.1900000 MHz  
 WDW EM  
 SSB 0  
 LB 0.30 Hz  
 GB 0  
 PC 1.00

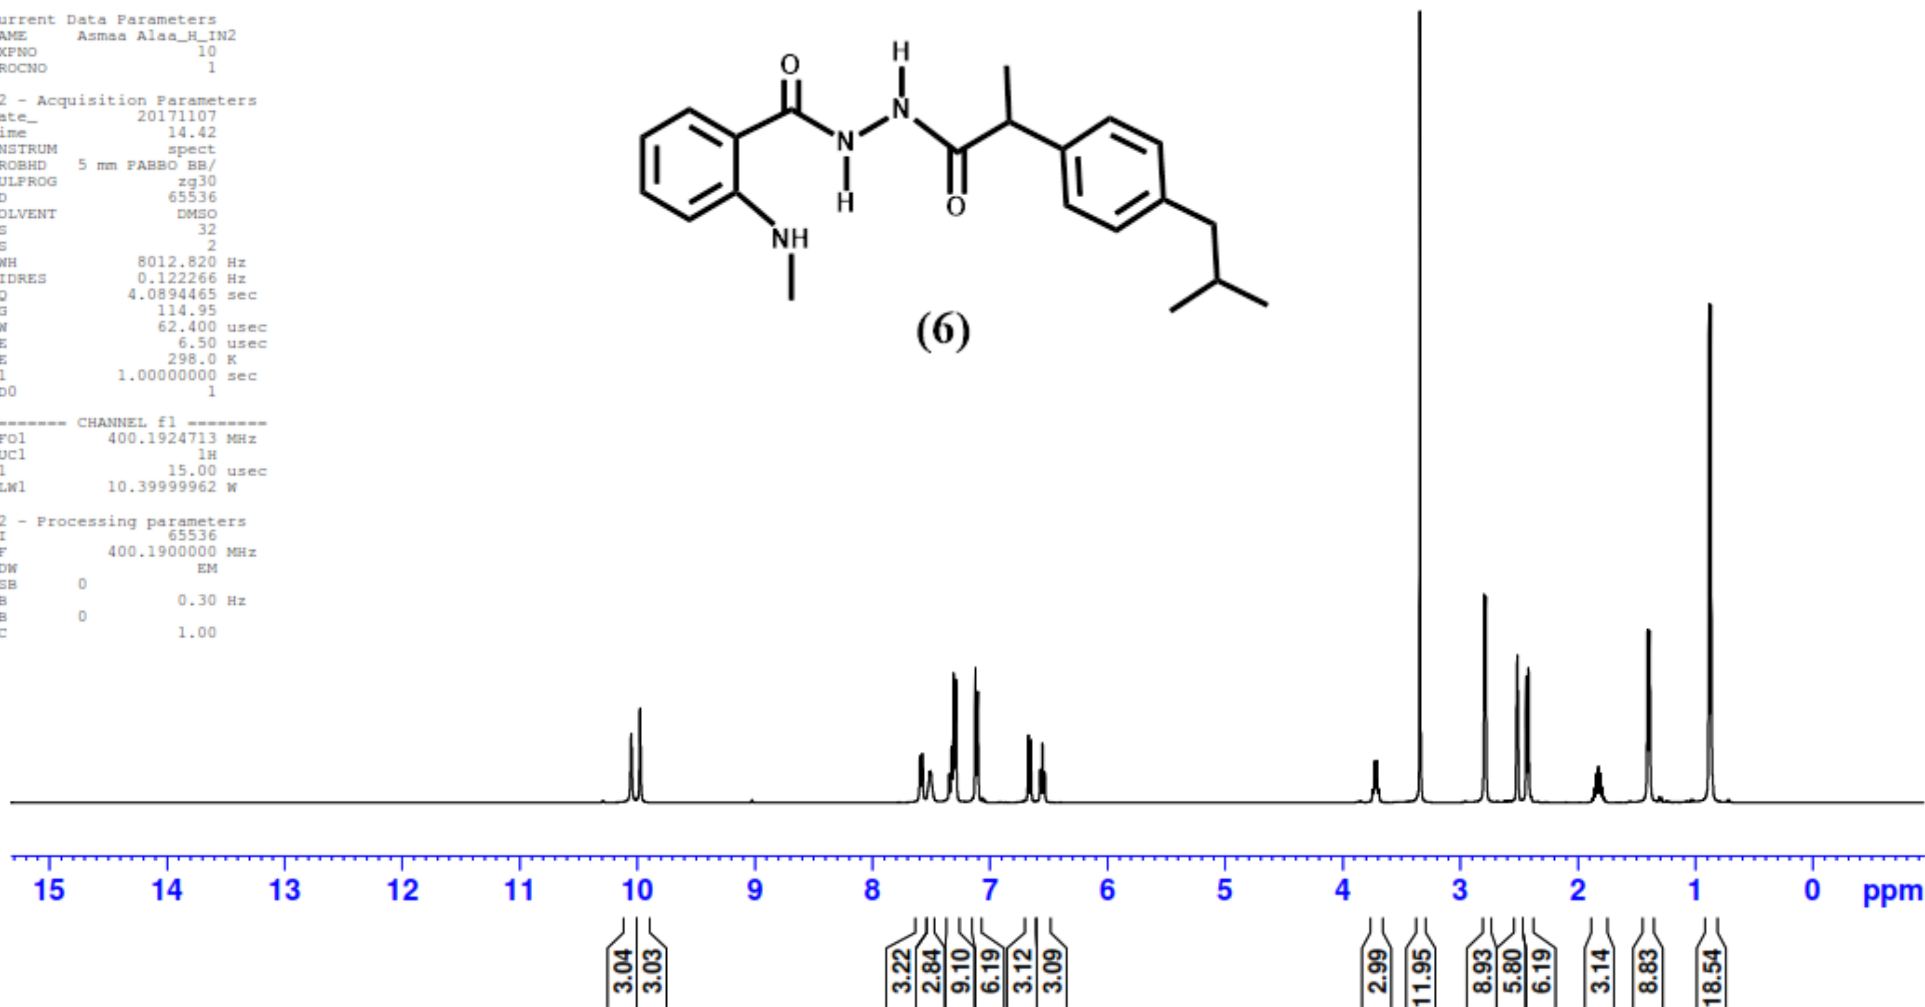

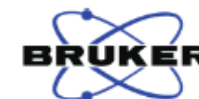

Current Data Parameters  
 NAME Asmaa Alaa\_H\_IN2\_D2O  
 EXPNO 10  
 PROCNO 1

F2 - Acquisition Parameters  
 Date\_ 20171108  
 Time 12.33  
 INSTRUM spect  
 PROBHD 5 mm FAPBO BB/  
 PULPROG zg30  
 TD 65536  
 SOLVENT DMSO  
 NS 32  
 DS 2  
 SWH 8012.820 Hz  
 FIDRES 0.122266 Hz  
 AQ 4.0894465 sec  
 RG 129.43  
 DW 62.400 usec  
 DE 6.50 usec  
 TE 298.0 K  
 D1 1.00000000 sec  
 TDO 1

----- CHANNEL f1 -----  
 SF01 400.1924713 MHz  
 NUC1 1H  
 P1 15.00 usec  
 PLW1 10.39999962 W

F2 - Processing parameters  
 SI 65536  
 SF 400.1900000 MHz  
 WDW EM  
 SSB 0  
 LB 0.30 Hz  
 GB 0  
 PC 1.00

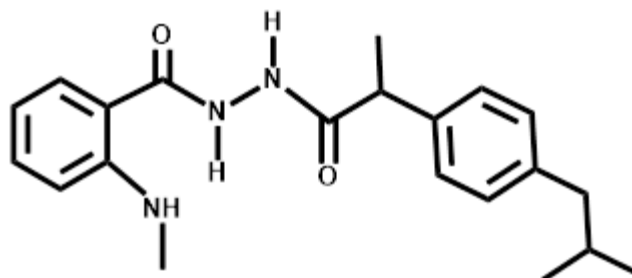

(6)

7.4933  
 7.4743  
 7.3363  
 7.3168  
 7.2980  
 7.2588  
 7.2401  
 7.0823  
 7.0632  
 6.6631  
 6.6423  
 6.5712  
 6.5527  
 6.5344  
 4.1421  
 3.6822  
 3.6652  
 2.7162  
 2.5141  
 2.3799  
 2.3627  
 1.7642  
 1.7475  
 1.7314  
 1.3694  
 1.3526  
 0.8168  
 0.8006

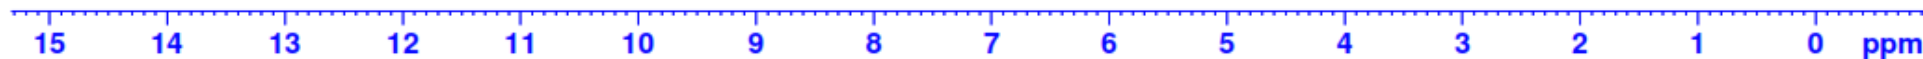

2.76  
 2.92  
 5.51  
 5.55  
 2.80  
 2.81  
 27.37  
 2.69  
 8.49  
 5.11  
 5.71  
 2.88  
 8.13  
 17.25

Asmaa Alaa\_H\_B-S17

Microanalytical Unit - FOPCU - NMR laboratory  
www.pharma.cu.edu.eg dir-mau.fopcu@pharma.cu.edu.eg

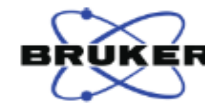

10.3905  
10.3281  
7.8013  
7.7824  
7.7666  
7.7475  
7.4674  
7.4642  
7.4472  
7.4342  
7.4170  
7.3545  
7.3376  
7.3179  
7.2994  
7.2697  
7.2512  
7.2409  
7.2326  
7.2215  
7.2071  
7.1868  
7.1204  
7.0989  
7.0780  
7.0074  
6.9889  
6.8710  
6.8526  
6.8426  
6.8243  
6.7277  
6.7070  
5.8057  
5.5746  
3.6956  
3.6780  
3.6616  
3.6455  
3.6280  
3.3596  
3.3461  
2.7821  
2.7131  
2.5095  
2.4577  
2.4395  
2.4327  
2.4145  
1.8625  
1.8454  
1.8250

Current Data Parameters  
NAME Asmaa Alaa\_H\_B-S17  
EXPNO 10  
PROCNO 1

F2 - Acquisition Parameters  
Date\_ 20180423  
Time 7.15  
INSTRUM spect  
PROBHD 5 mm FAPBO BB/  
PULPROG zg30  
TD 65536  
SOLVENT DMSO  
NS 32  
DS 2  
SWH 8012.820 Hz  
FIDRES 0.122266 Hz  
AQ 4.0894465 sec  
RG 84.65  
DW 62.400 usec  
DE 6.50 usec  
TE 298.0 K  
D1 1.00000000 sec  
TD0 1

----- CHANNEL f1 -----  
SF01 400.1924713 MHz  
NUC1 1H  
P1 15.00 usec  
PLW1 10.39999962 W

F2 - Processing parameters  
SI 65536  
SF 400.1900000 MHz  
WDW EM  
SSB 0  
LB 0.30 Hz  
GB 0  
PC 1.00

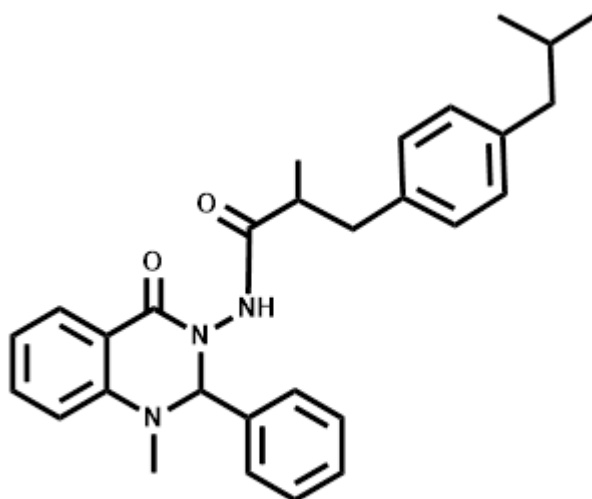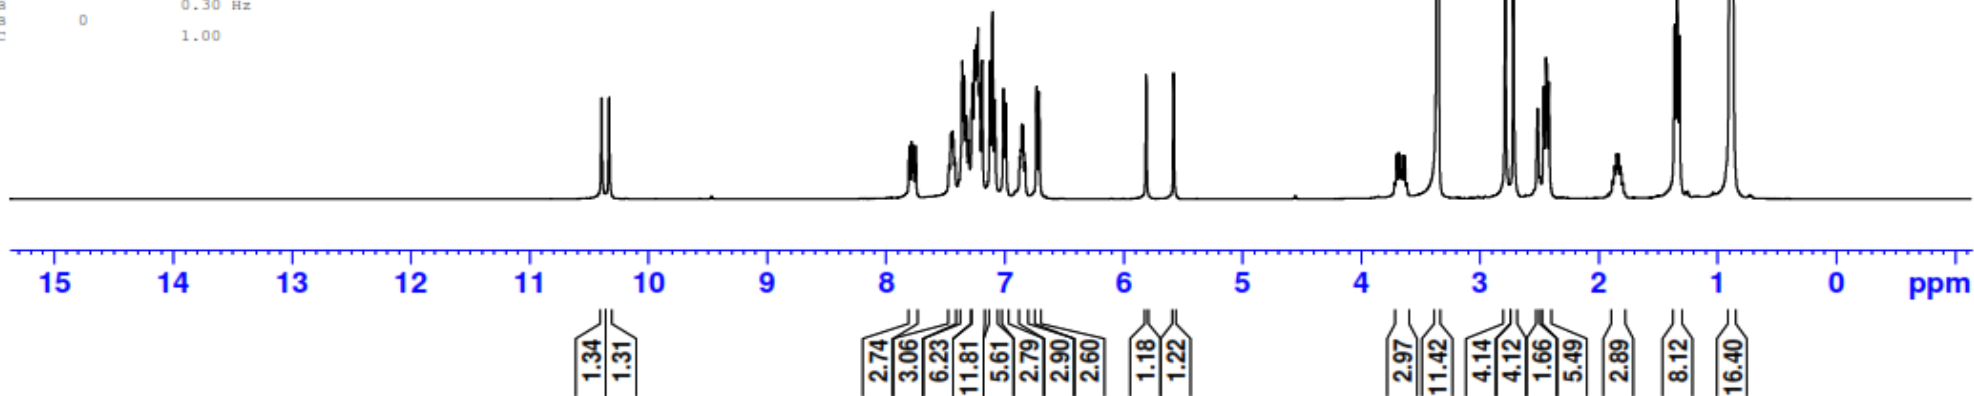

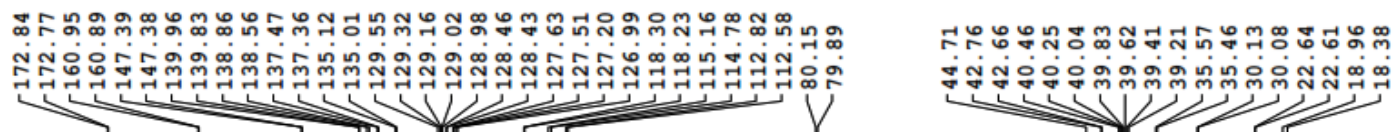

Current Data Parameters  
NAME Asmaa Sakr\_C\_B-S17  
EXPNO 10  
PROCNO 1

F2 - Acquisition Parameters  
Date\_ 20180510  
Time 0.09  
INSTRUM spect  
PROBHD 5 mm PABBO BB/  
PULPROG zgpg30  
TD 65536  
SOLVENT DMSO  
NS 1200  
DS 4  
SWH 24038.461 Hz  
FIDRES 0.366798 Hz  
AQ 1.3631488 sec  
RG 202.37  
DW 20.800 usec  
DE 6.50 usec  
TE 298.0 K  
D1 2.00000000 sec  
D11 0.03000000 sec  
TDO 1

==== CHANNEL f1 =====  
SFO1 100.6379178 MHz  
NUC1 13C  
P1 10.00 usec  
PLW1 45.00000000 W

==== CHANNEL f2 =====  
SFO2 400.1916008 MHz  
NUC2 1H  
CPDPRG[2] waltz16

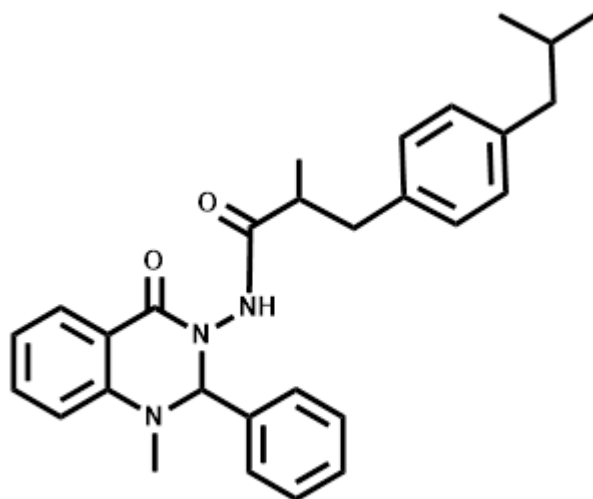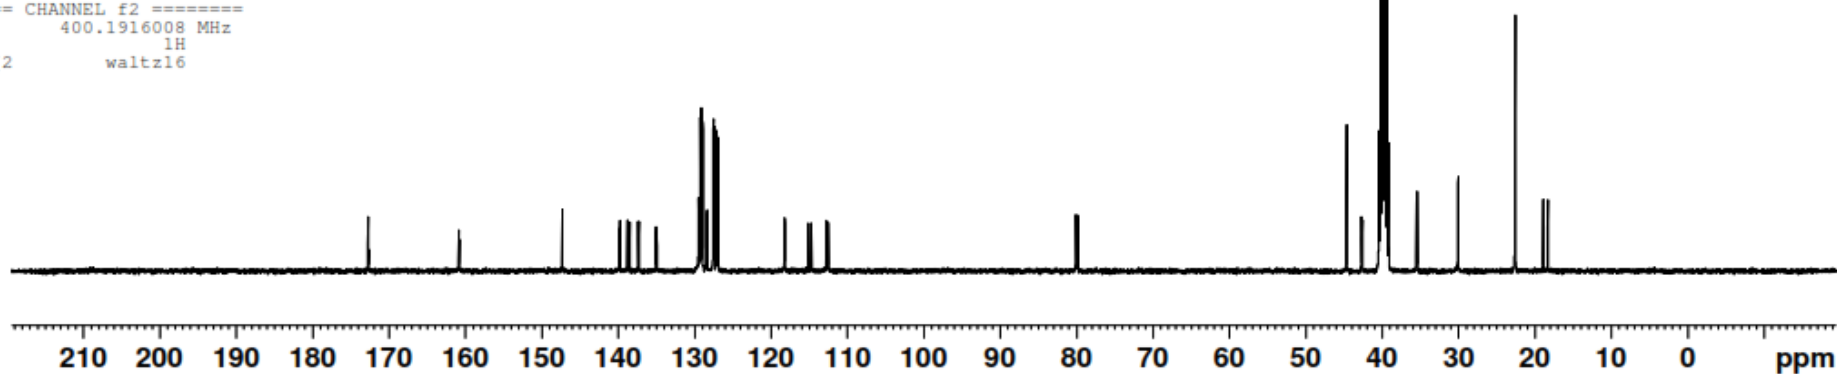

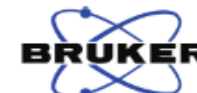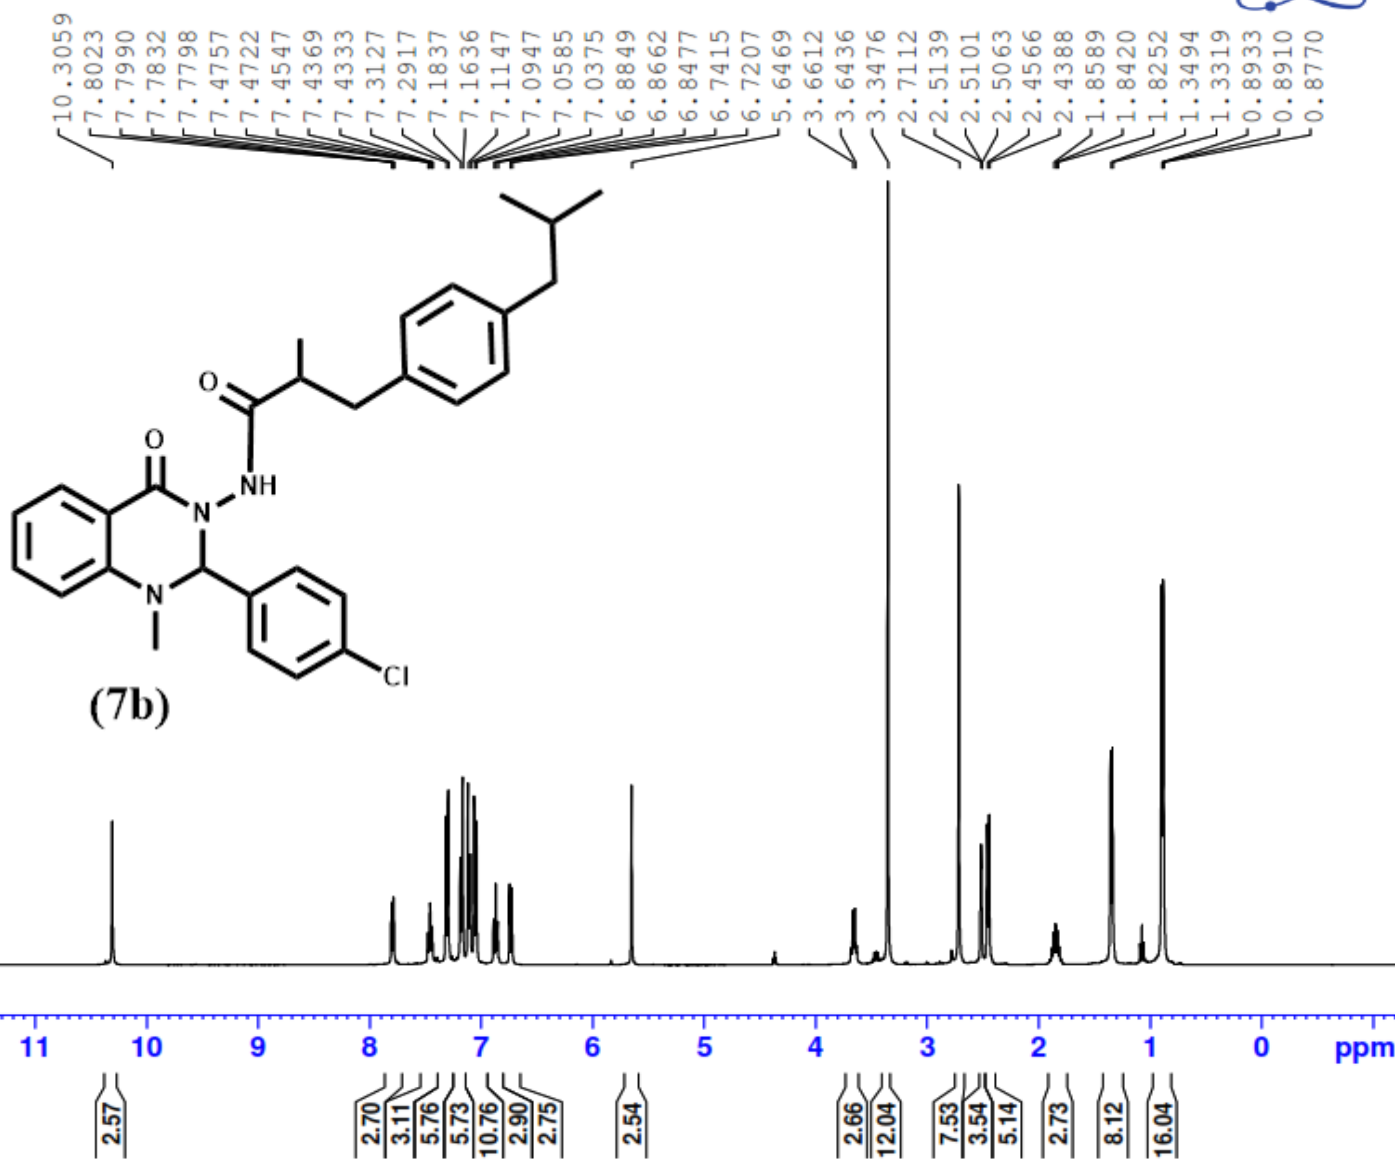

Current Data Parameters  
 NAME Asmaa Alaa\_H\_B-S13  
 EXPNO 10  
 PROCNO 1

F2 - Acquisition Parameters  
 Date\_ 20171207  
 Time 14.42  
 INSTRUM spect  
 PROBHD 5 mm FAPBO BB/  
 PULPROG zg30  
 TD 65536  
 SOLVENT DMSO  
 NS 32  
 DS 2  
 SWH 8012.820 Hz  
 FIDRES 0.122266 Hz  
 AQ 4.0894465 sec  
 RG 91.58  
 DN 62.400 usec  
 DE 6.50 usec  
 TE 298.1 K  
 D1 1.00000000 sec  
 TDO 1

----- CHANNEL f1 -----  
 SFO1 400.1924713 MHz  
 NUC1 1H  
 P1 15.00 usec  
 PLW1 10.39999962 W

F2 - Processing parameters  
 SI 65536  
 SF 400.1900000 MHz  
 WDW EM  
 SSB 0  
 LB 0.30 Hz  
 GB 0  
 PC 1.00



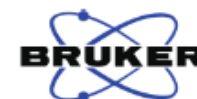

Current Data Parameters  
 NAME Asmaa Alaa\_H\_BS13\_D20  
 EXPNO 10  
 PROCNO 1

F2 - Acquisition Parameters  
 Date\_ 20180102  
 Time 15.33  
 INSTRUM spect  
 PROBHD 5 mm PABBO BB/  
 FULPROG zg30  
 TD 65536  
 SOLVENT DMSO  
 NS 32  
 DS 2  
 SWH 8012.820 Hz  
 FIDRES 0.122266 Hz  
 AQ 4.0894465 sec  
 RG 84.65  
 DW 62.400 usec  
 DE 6.50 usec  
 TE 298.0 K  
 D1 1.00000000 sec  
 TDO 1

----- CHANNEL f1 -----  
 SF01 400.1924713 MHz  
 NUC1 1H  
 P1 15.00 usec  
 PLM1 10.39999962 W

F2 - Processing parameters  
 S1 65536  
 SF 400.1900000 MHz  
 MDW EM  
 SSB 0  
 LB 0.30 Hz  
 GB 0  
 PC 1.00

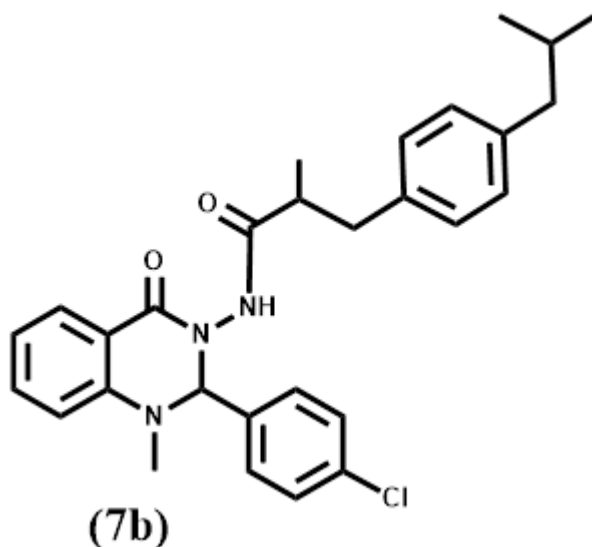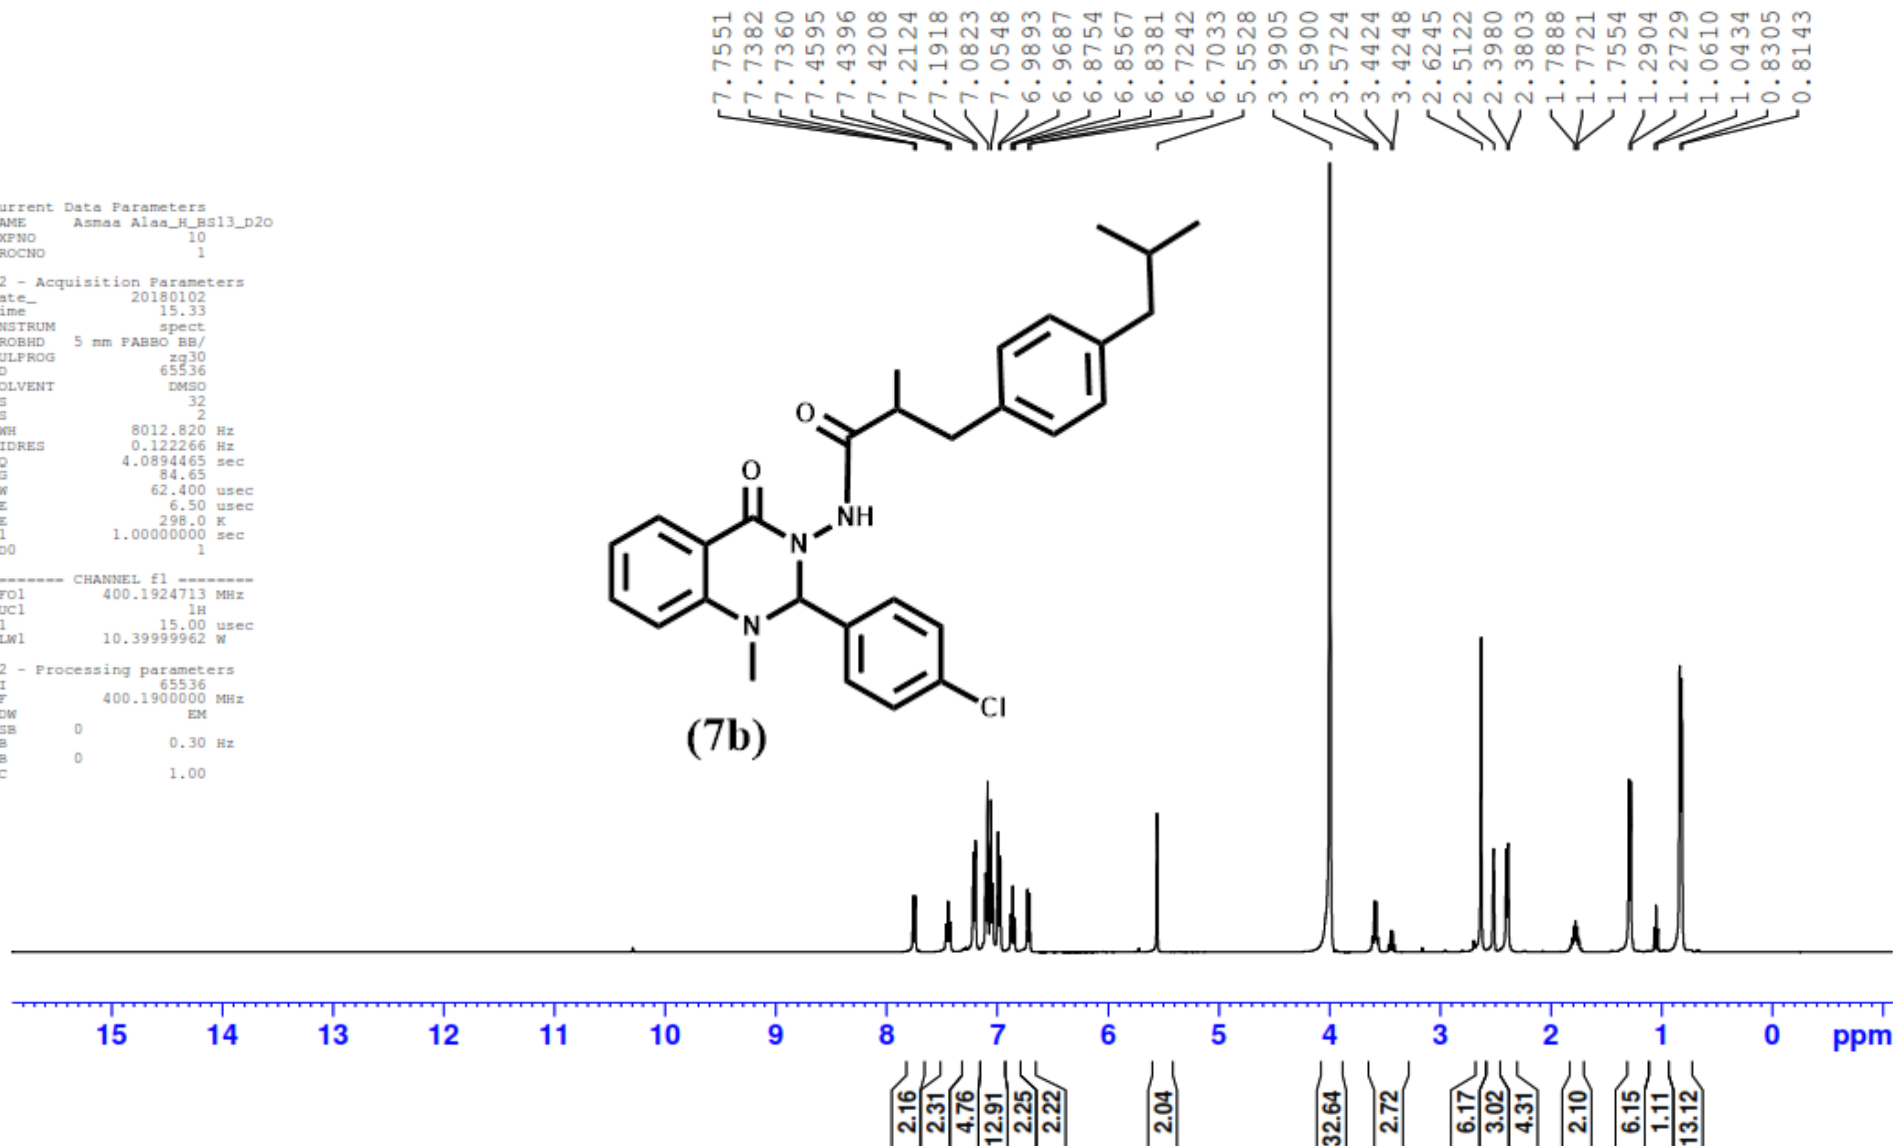

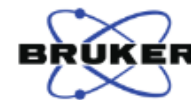

— 172.73 — 160.84 — 147.27 — 139.93 — 138.83 — 136.40 — 135.13 — 134.13 — 129.29 — 128.99 — 128.96 — 128.51 — 127.50 — 118.42 — 114.78 — 112.77 — 79.18 — 44.72 — 42.81 — 40.60 — 40.40 — 40.19 — 39.98 — 39.77 — 39.56 — 39.35 — 35.36 — 30.12 — 22.67 — 22.64 — 18.44

Current Data Parameters  
 NAME Asmaa Alaa\_C\_BS13  
 EXPNO 10  
 PROCNO 1

F2 - Acquisition Parameters  
 Date\_ 20171231  
 Time\_ 19.31  
 INSTRUM spect  
 PROBHD 5 mm PABBO BB/  
 PULPROG zgpg30  
 TD 65536  
 SOLVENT DMSO  
 NS 1200  
 DS 4  
 SWH 24038.461 Hz  
 FIDRES 0.366798 Hz  
 AQ 1.3631488 sec  
 RG 202.37  
 DW 20.800 usec  
 DE 6.50 usec  
 TE 298.1 K  
 D1 2.00000000 sec  
 D11 0.03000000 sec  
 TDO 1

==== CHANNEL f1 =====  
 SFO1 100.6379178 MHz  
 NUC1 13C  
 P1 10.00 usec  
 PLW1 45.00000000 W

==== CHANNEL f2 =====  
 SFO2 400.1916008 MHz  
 NUC2 1H  
 CPDPRG[2] waltz16

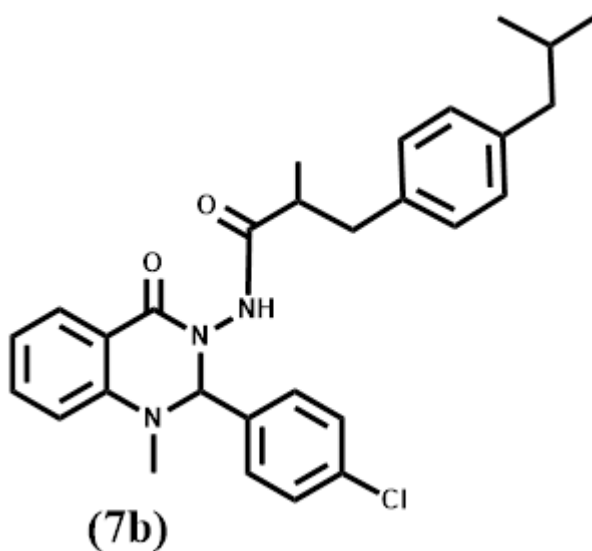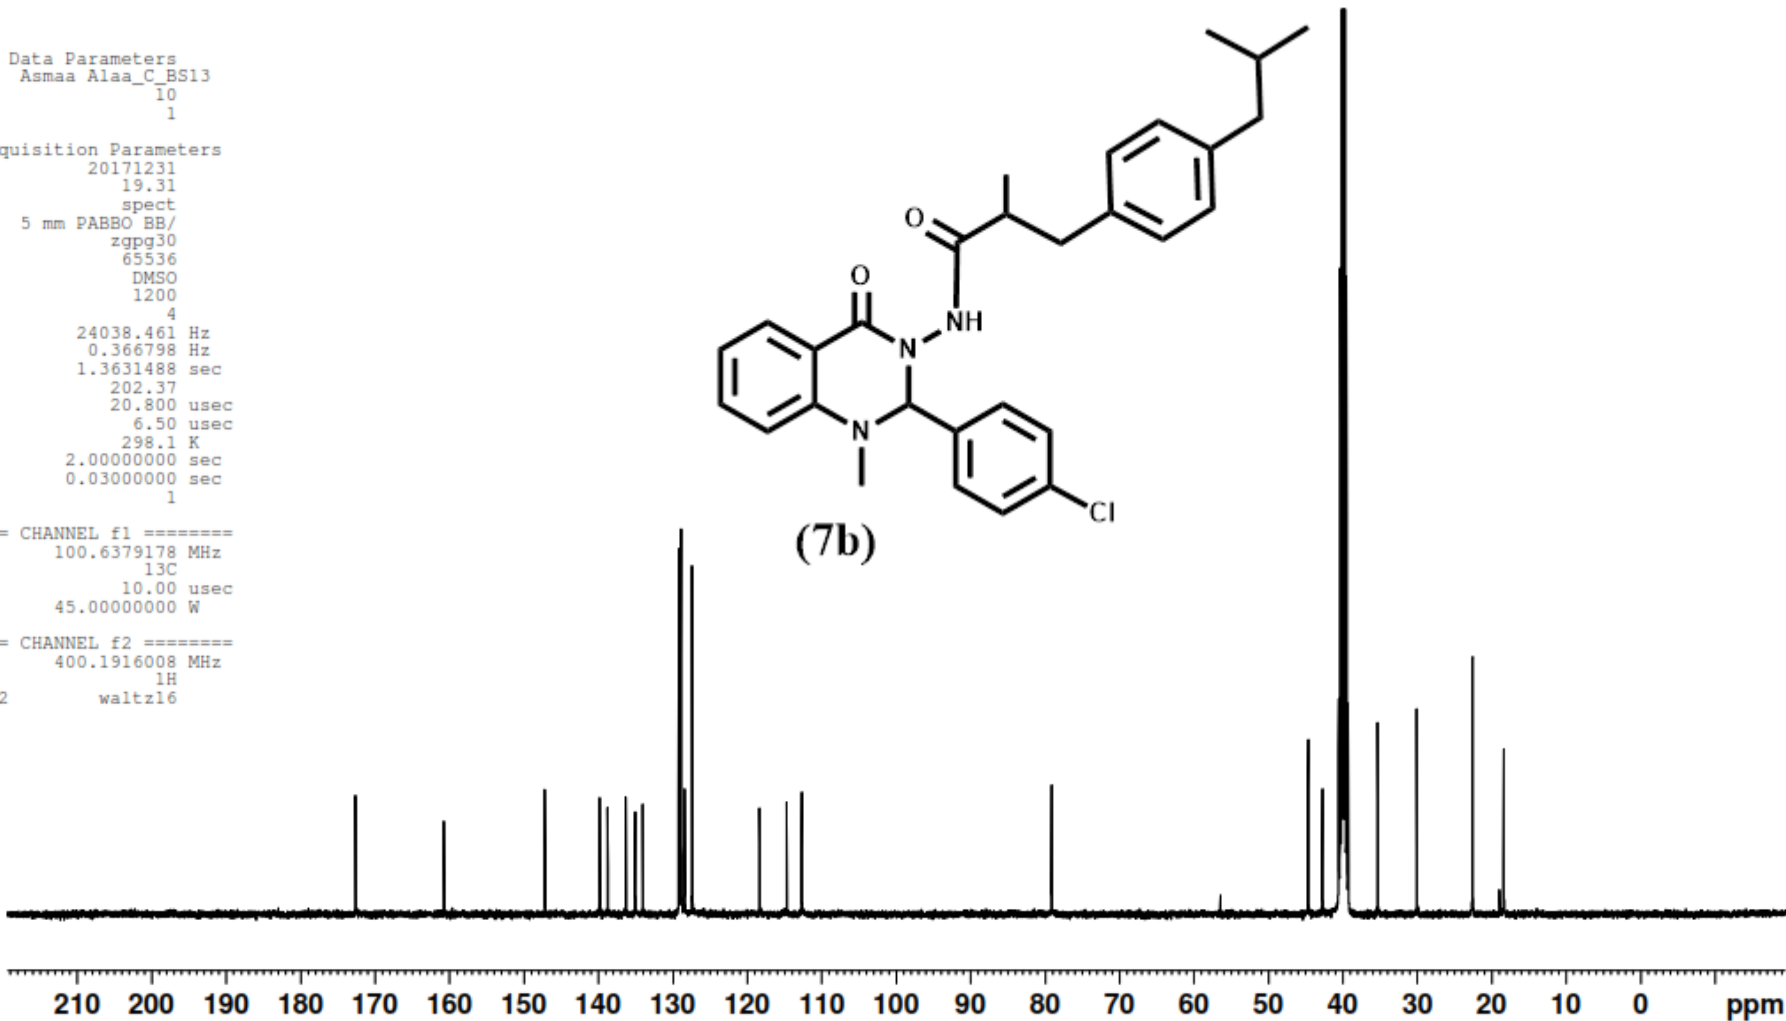

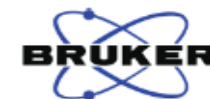

10.3562  
8.1080  
8.0863  
7.8227  
7.8193  
7.8035  
7.8000  
7.4956  
7.4919  
7.4743  
7.4567  
7.4529  
7.3549  
7.3332  
7.1657  
7.1454  
7.0894  
7.0694  
6.9167  
6.8981  
6.8797  
6.7735  
6.7527  
5.8601  
3.6521  
3.6347  
3.6171  
3.5996  
3.3454  
2.8143  
2.7511  
2.5142  
2.5102  
2.5062  
2.4444  
2.4269  
1.8461  
1.8293  
1.8125  
1.3423  
1.3248  
0.8854  
0.8808

Current Data Parameters  
NAME Asmaa Alaa\_H\_B-S14  
EXPNO 10  
PROCNO 1

F2 - Acquisition Parameters  
Date\_ 20171207  
Time 14.53  
INSTRUM spect  
PROBHD 5 mm PABBO BB/  
PULPROG zg30  
TD 65536  
SOLVENT DMSO  
NS 32  
DS 2  
SWH 8012.820 Hz  
FIDRES 0.122266 Hz  
AQ 4.0894465 sec  
RG 106.37  
DM 62.400 usec  
DE 6.50 usec  
TE 298.0 K  
D1 1.00000000 sec  
TDO 1

----- CHANNEL f1 -----  
SF01 400.1924713 MHz  
NUC1 1H  
P1 15.00 usec  
PLM1 10.39999962 W

F2 - Processing parameters  
SI 65536  
SF 400.1900000 MHz  
WDW EM  
SSB 0  
LB 0.30 Hz  
GB 0  
PC 1.00

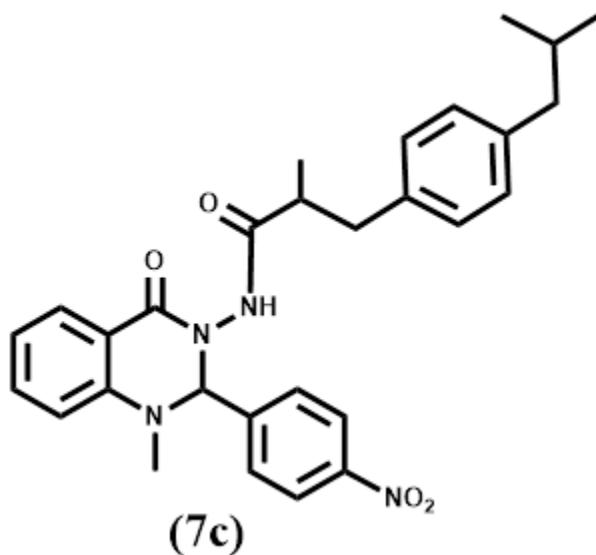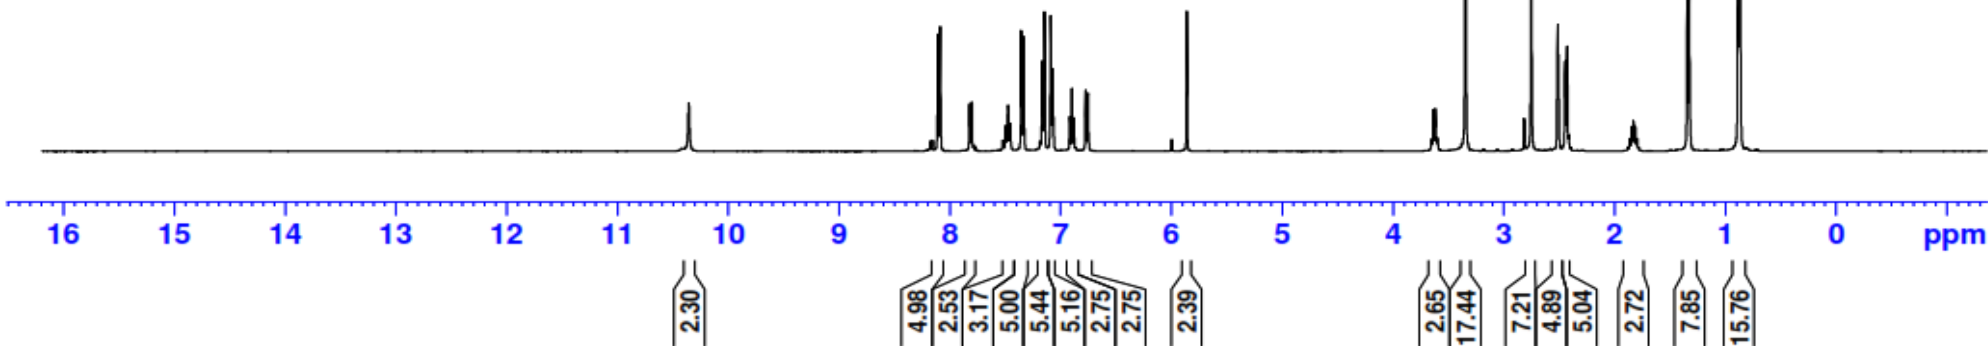

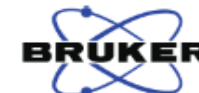

Current Data Parameters  
NAME Asmaa Alaa\_H\_BS14\_D20-  
EXPNO 10  
PROCNO 1

F2 - Acquisition Parameters

Date\_ 20180103  
Time 12.43  
INSTRUM spect  
PROBHD 5 mm PABBO BB/  
PULPROG zg30  
TD 65536  
SOLVENT DMSO  
NS 32  
DS 2  
SWH 8012.820 Hz  
FIDRES 0.122266 Hz  
AQ 4.0894465 sec  
RG 32.12  
DM 62.400 usec  
DE 6.50 usec  
TE 298.1 K  
D1 1.00000000 sec  
TDO 1

----- CHANNEL f1 -----  
SF01 400.1924713 MHz  
NUC1 1H  
P1 15.00 usec  
PLW1 10.39999962 W

F2 - Processing parameters  
SI 65536  
SF 400.1900000 MHz  
WDW EM  
SSB 0  
LB 0.30 Hz  
GB 0  
PC 1.00

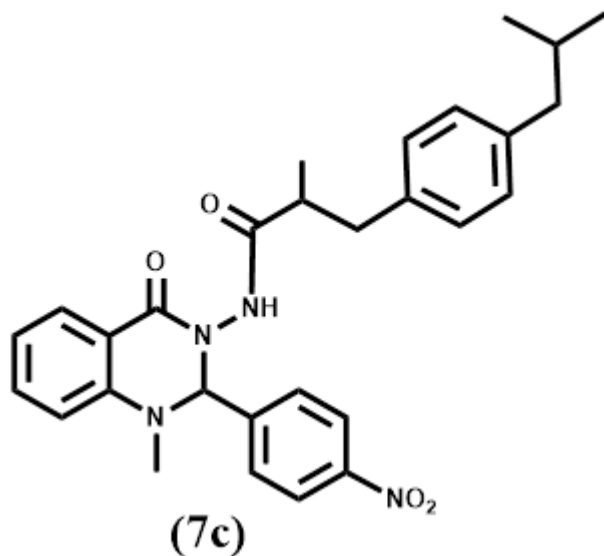

7.9756  
7.9562  
7.7690  
7.7518  
7.4683  
7.2616  
7.2434  
7.0229  
7.0026  
6.8962  
6.7750  
6.7564  
5.7394  
4.1494  
3.1567  
2.6300  
2.5141  
2.3629  
1.2668  
1.2536  
0.8062  
0.7958

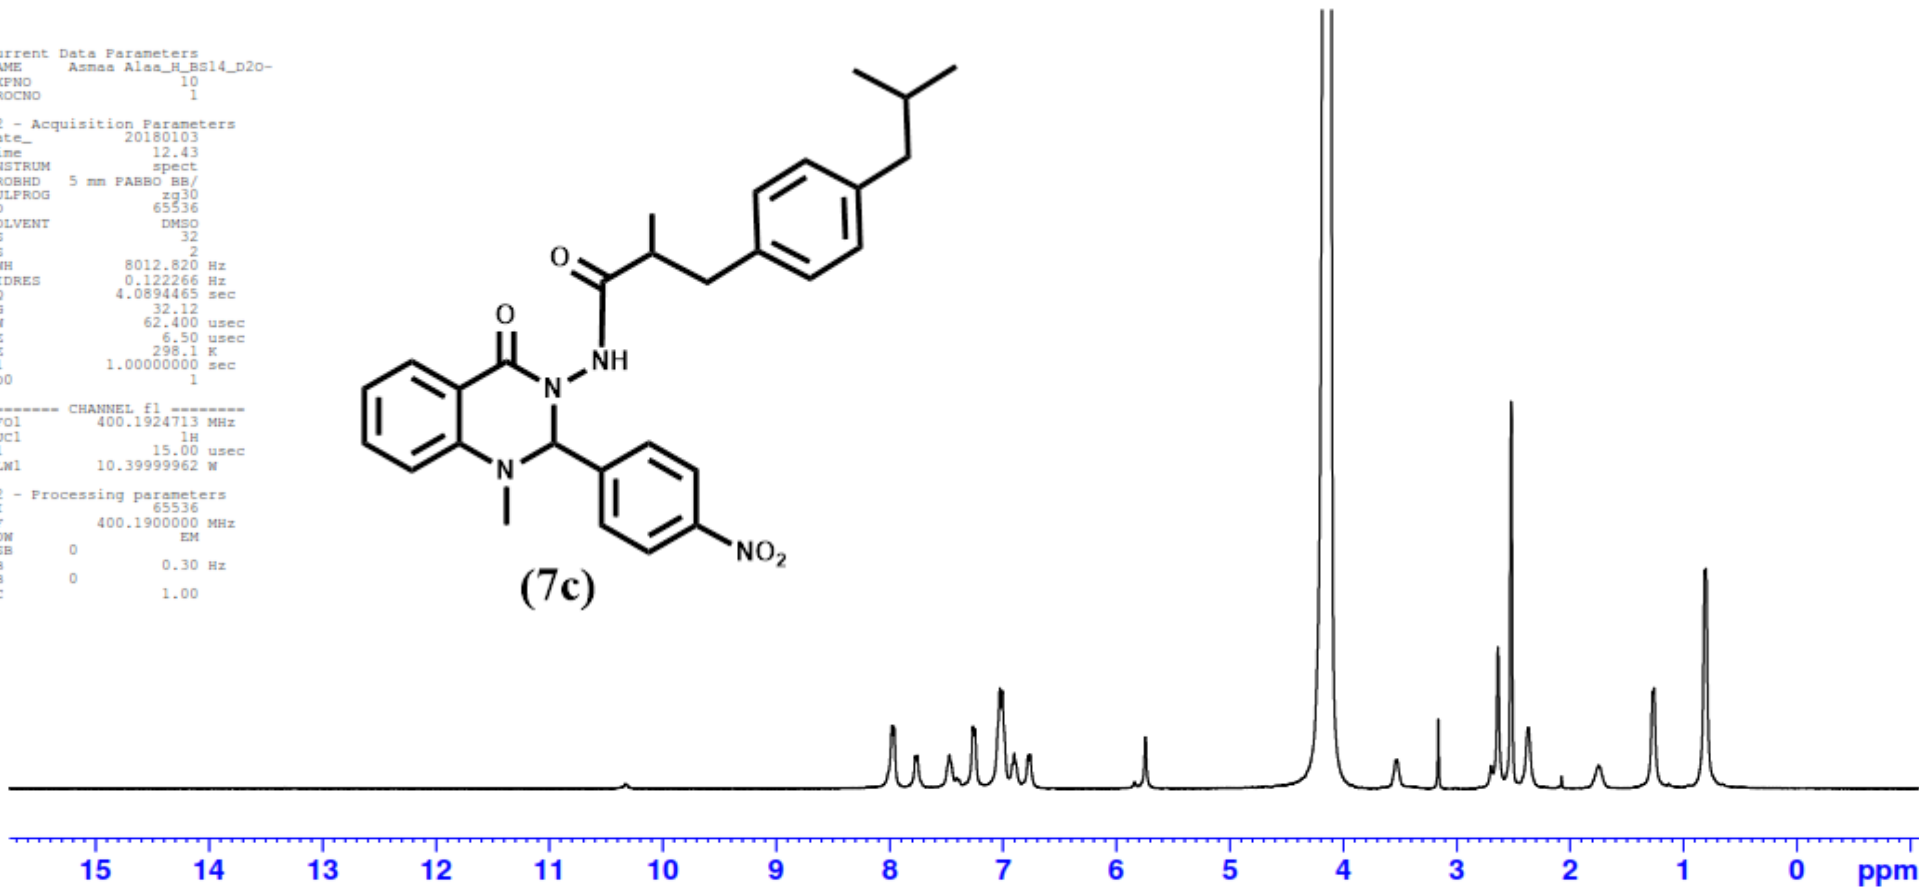

1.06  
1.16  
2.04  
89.31  
3.28  
3.15

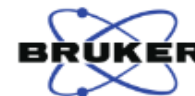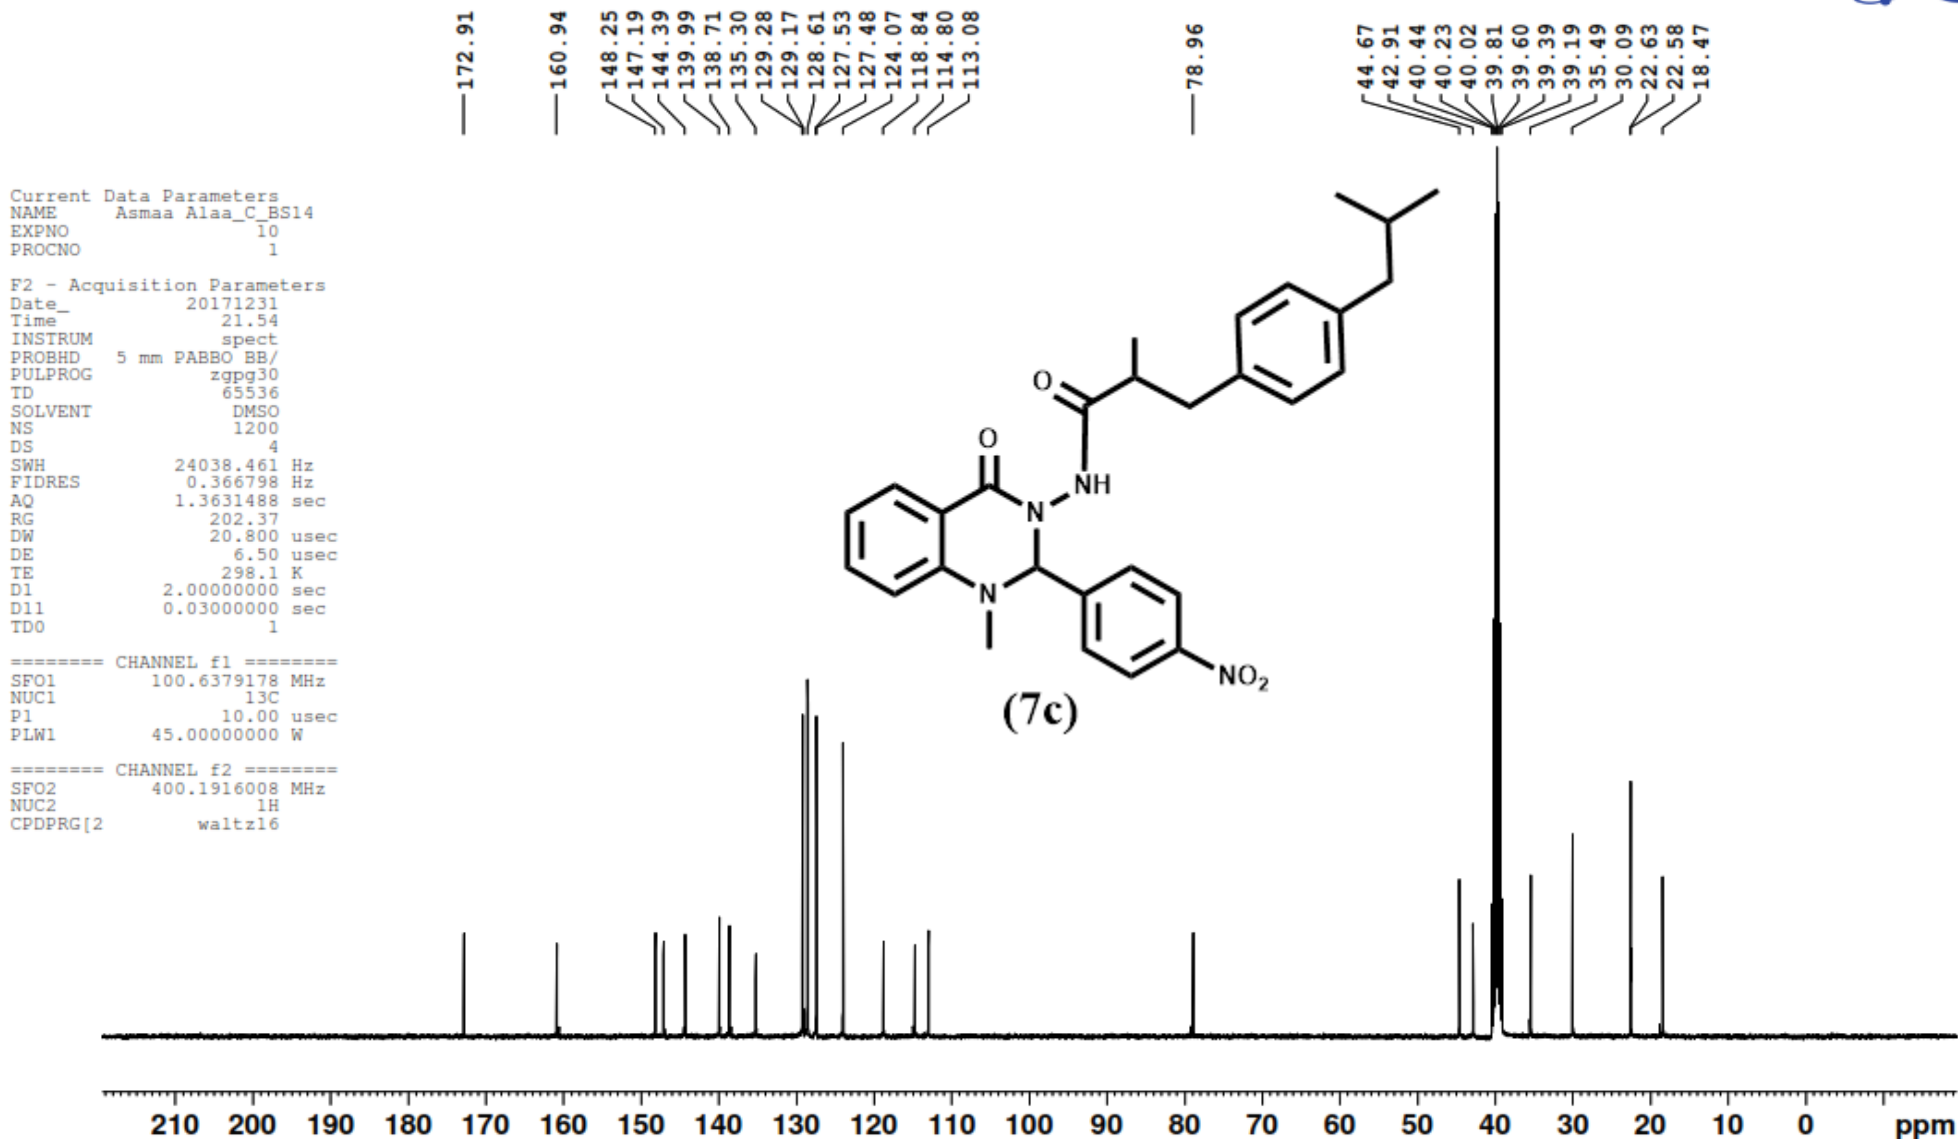

Current Data Parameters  
 NAME Asmaa Alaa\_H\_B-S15  
 EXPNO 10  
 PROCNO 1

F2 - Acquisition Parameters  
 Date\_ 20180102  
 Time 18.04  
 INSTRUM spect  
 PROBHD 5 mm FAPBO BB/  
 PULPROG zg30  
 TD 65536  
 SOLVENT DMSO  
 NS 32  
 DS 2  
 SWH 8012.820 Hz  
 FIDRES 0.122266 Hz  
 AQ 4.0894465 sec  
 RG 129.43  
 DW 62.400 usec  
 DE 6.50 usec  
 TE 298.0 K  
 D1 1.00000000 sec  
 TD0 1

----- CHANNEL f1 -----  
 SFO1 400.1924713 MHz  
 NUC1 1H  
 P1 15.00 usec  
 PL1 10.39999962 W

F2 - Processing parameters  
 SI 65536  
 SF 400.1900000 MHz  
 WDW EM  
 SSB 0  
 LB 0.30 Hz  
 GB 0  
 PC 1.00

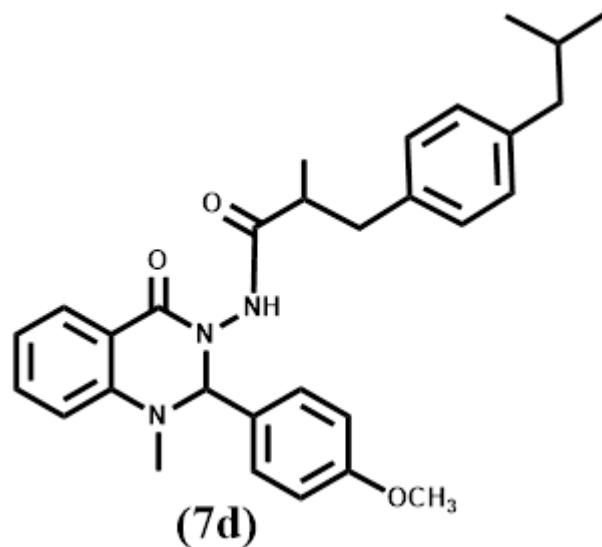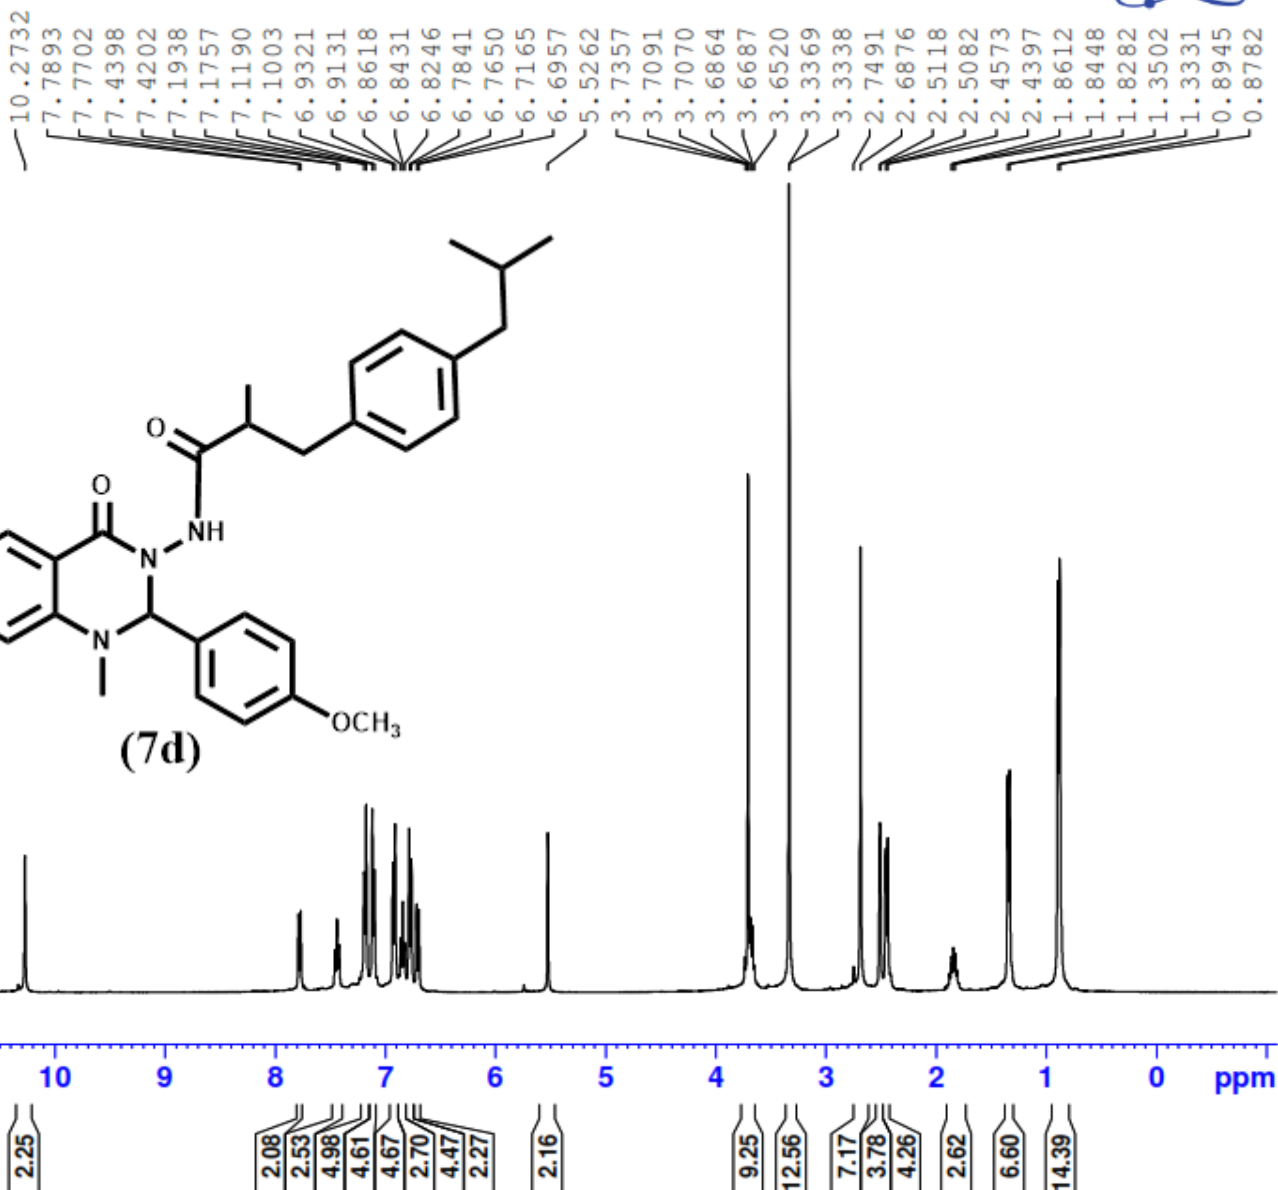

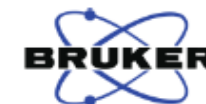

Current Data Parameters  
 NAME Asmaa Alaa\_H\_BS-15\_D2O  
 EXPNO 10  
 PROCNO 1

F2 - Acquisition Parameters  
 Date\_ 20180114  
 Time 13.07  
 INSTRUM spect  
 PROBHD 5 mm FAPBO BB/  
 PULPROG zg30  
 TD 65536  
 SOLVENT DMSO  
 NS 32  
 DS 2  
 SWH 8012.820 Hz  
 FIDRES 0.122266 Hz  
 AQ 4.0894465 sec  
 RG 129.43  
 DW 62.400 usec  
 DE 6.50 usec  
 TE 298.1 K  
 D1 1.00000000 sec  
 TD0 1

----- CHANNEL f1 -----  
 SFO1 400.1924713 MHz  
 NUC1 1H  
 P1 15.00 usec  
 PLM1 10.39999962 W

F2 - Processing parameters  
 SI 65536  
 SF 400.1900000 MHz  
 WDW EM  
 SSB 0  
 LB 0.30 Hz  
 GB 0  
 PC 1.00

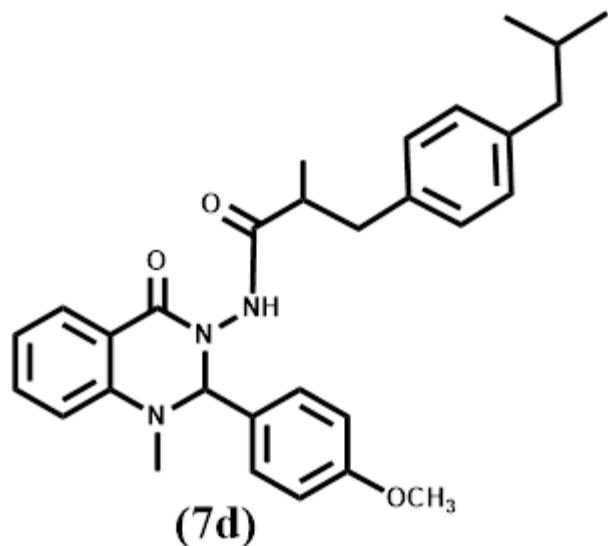

7.7435  
 7.7260  
 7.4540  
 7.4356  
 7.4174  
 7.1222  
 7.1023  
 7.0734  
 7.0532  
 6.8690  
 6.8475  
 6.8230  
 6.7188  
 6.7058  
 6.6976  
 6.6861  
 5.4357  
 4.0605  
 3.6829  
 3.6536  
 3.6141  
 3.5965  
 2.6804  
 2.6209  
 2.5127  
 2.4035  
 2.3859  
 1.7754  
 1.7585  
 1.3006  
 1.2830  
 0.8368  
 0.8310  
 0.8210  
 0.8152

1.56  
 1.69  
 6.98  
 4.89  
 4.50  
 1.32  
 42.83  
 6.43  
 0.70  
 4.12  
 3.57  
 3.49  
 1.75  
 4.62  
 10.25

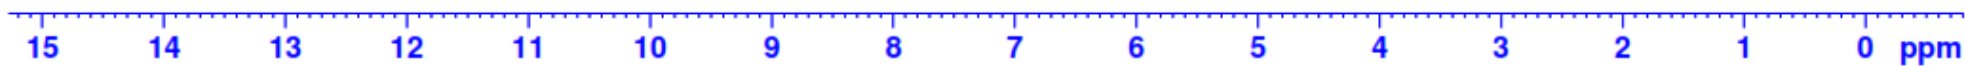

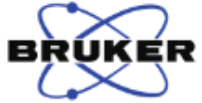

— 172.64  
 < 160.89  
 < 160.16  
 — 147.44  
 < 139.88  
 < 138.95  
 < 134.99  
 < 129.51  
 < 129.29  
 < 128.39  
 < 127.52  
 < 118.08  
 < 114.84  
 < 114.25  
 < 112.55  
 — 79.51  
 < 55.54  
 < 44.72  
 < 42.72  
 < 40.62  
 < 40.41  
 < 40.20  
 < 39.99  
 < 39.78  
 < 39.57  
 < 39.36  
 < 35.32  
 < 30.14  
 < 22.68  
 < 22.63  
 < 18.44

Current Data Parameters  
 NAME Asmaa Alaa\_C\_B-S15  
 EXPNO 10  
 PROCNO 1

F2 - Acquisition Parameters  
 Date\_ 20180111  
 Time\_ 21.54  
 INSTRUM spect  
 PROBHD 5 mm PABBO BB/  
 PULPROG zgpg30  
 TD 65536  
 SOLVENT DMSO  
 NS 1200  
 DS 4  
 SWH 24038.461 Hz  
 FIDRES 0.366798 Hz  
 AQ 1.3631488 sec  
 RG 202.37  
 DW 20.800 usec  
 DE 6.50 usec  
 TE 298.0 K  
 D1 2.00000000 sec  
 D11 0.03000000 sec  
 TDO 1

===== CHANNEL f1 =====  
 SFO1 100.6379178 MHz  
 NUC1 13C  
 P1 10.00 usec  
 PLW1 45.00000000 W

===== CHANNEL f2 =====  
 SFO2 400.1916008 MHz  
 NUC2 1H  
 CPDPRG[2] waltz16

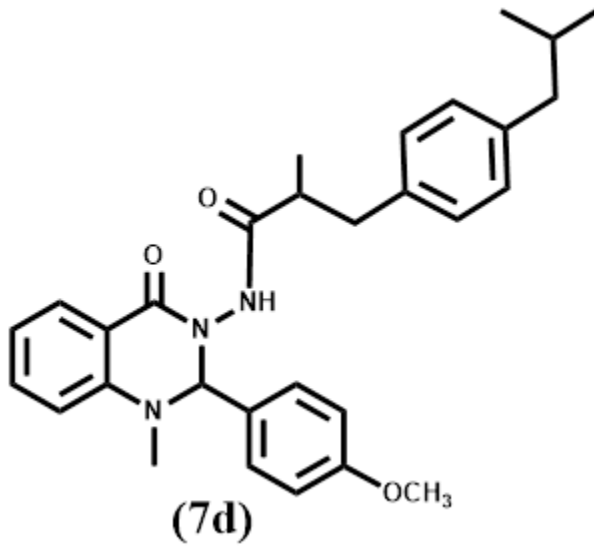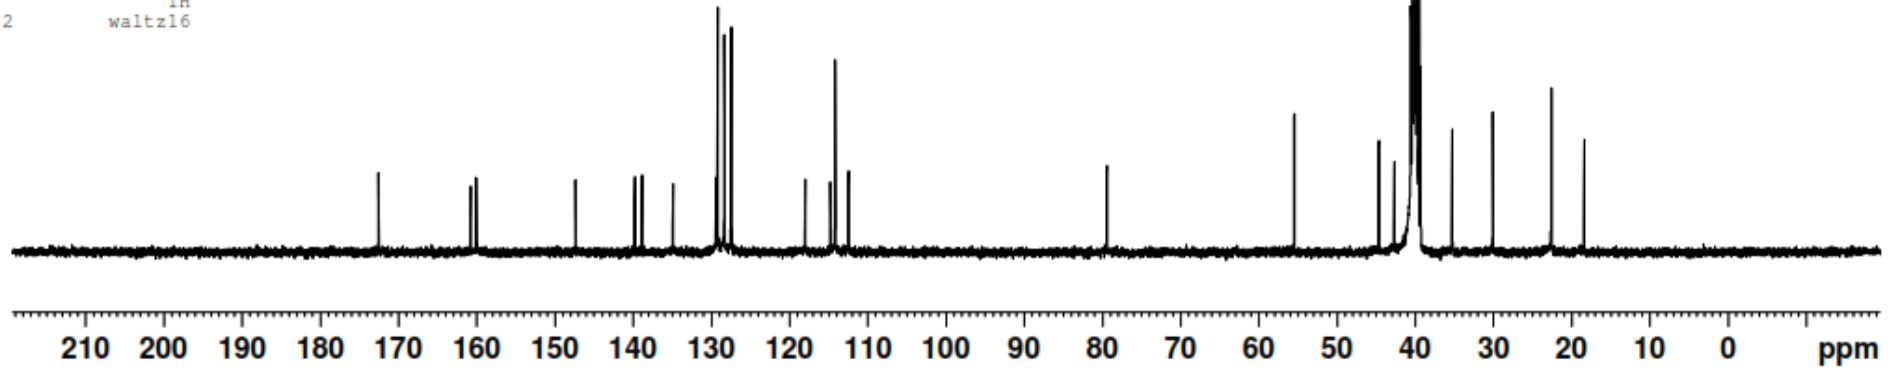



Asmaa Alaa\_H\_B-S16

Microanalytical Unit - FOPCU - NMR laboratory  
www.pharma.cu.edu.eg dir-mau.fopcu@pharma.cu.edu.eg

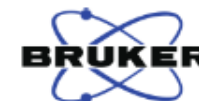

10.2960  
7.8000  
7.7966  
7.7809  
7.7774  
7.4753  
7.4716  
7.4541  
7.4364  
7.4326  
7.1834  
7.1633  
7.1129  
7.0928  
7.0757  
7.0576  
6.8811  
6.8625  
6.8440  
6.7405  
6.7198  
5.6330  
3.6614  
3.6438  
3.3343  
2.7036  
2.5136  
2.5095  
2.5054  
2.4532  
2.4354  
1.8568  
1.8400  
1.8232  
1.3459  
1.3283  
0.8896  
0.8736

Current Data Parameters  
NAME Asmaa Alaa\_H\_B-S16  
EXPNO 10  
PROCNO 1

F2 - Acquisition Parameters  
Date\_ 20180423  
Time 7.09  
INSTRUM spect  
PROBHD 5 mm FAPBO BB/  
PULPROG zg30  
TD 65536  
SOLVENT DMSO  
NS 32  
DS 2  
SWH 8012.820 Hz  
FIDRES 0.122266 Hz  
AQ 4.0894465 sec  
RG 146.06  
DW 62.400 usec  
DE 6.50 usec  
TE 298.1 K  
D1 1.00000000 sec  
TDO 1

----- CHANNEL f1 -----  
SFO1 400.1924713 MHz  
NUC1 1H  
P1 15.00 usec  
PLW1 10.39999962 W

F2 - Processing parameters  
SI 65536  
SF 400.1900000 MHz  
WDW EM  
SSB 0  
LB 0.30 Hz  
GB 0  
PC 1.00

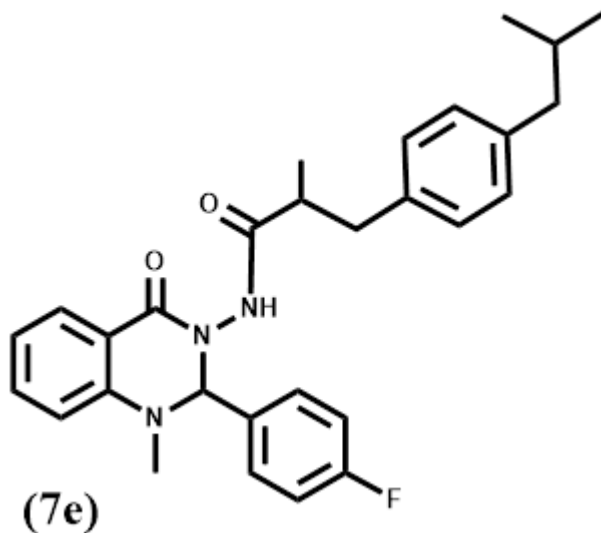

16 15 14 13 12 11 10 9 8 7 6 5 4 3 2 1 0 ppm

2.48

2.61

2.79

5.86

15.18

2.89

2.68

2.44

2.75

17.07

7.61

4.34

4.93

2.69

7.87

15.79

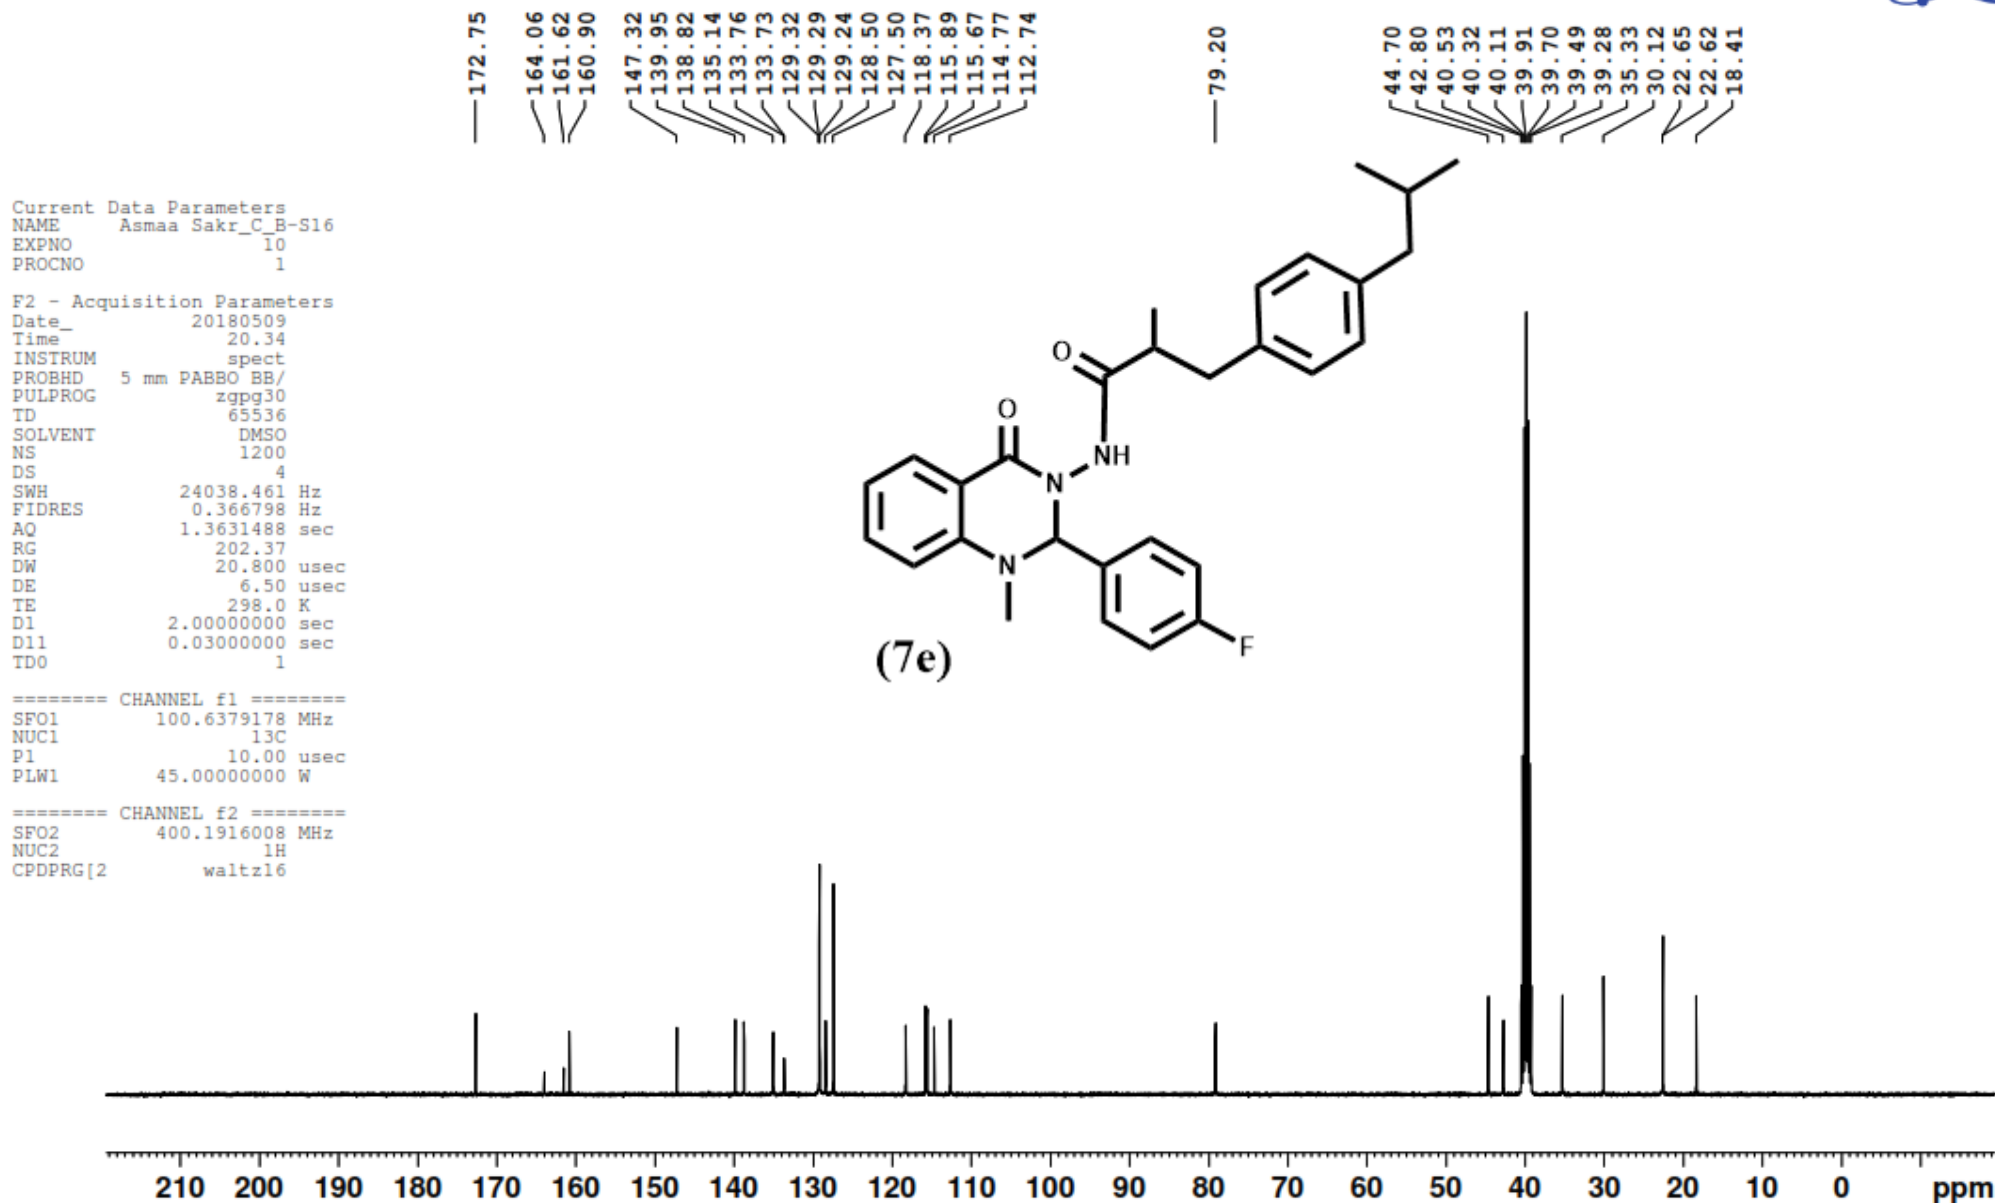

Asmaa Alaa\_H\_Sp2

Microanalytical Unit - FOPCU - NMR laboratory  
www.pharma.cu.edu.eg dir-mau.fopcu@pharma.cu.edu.eg

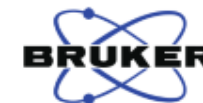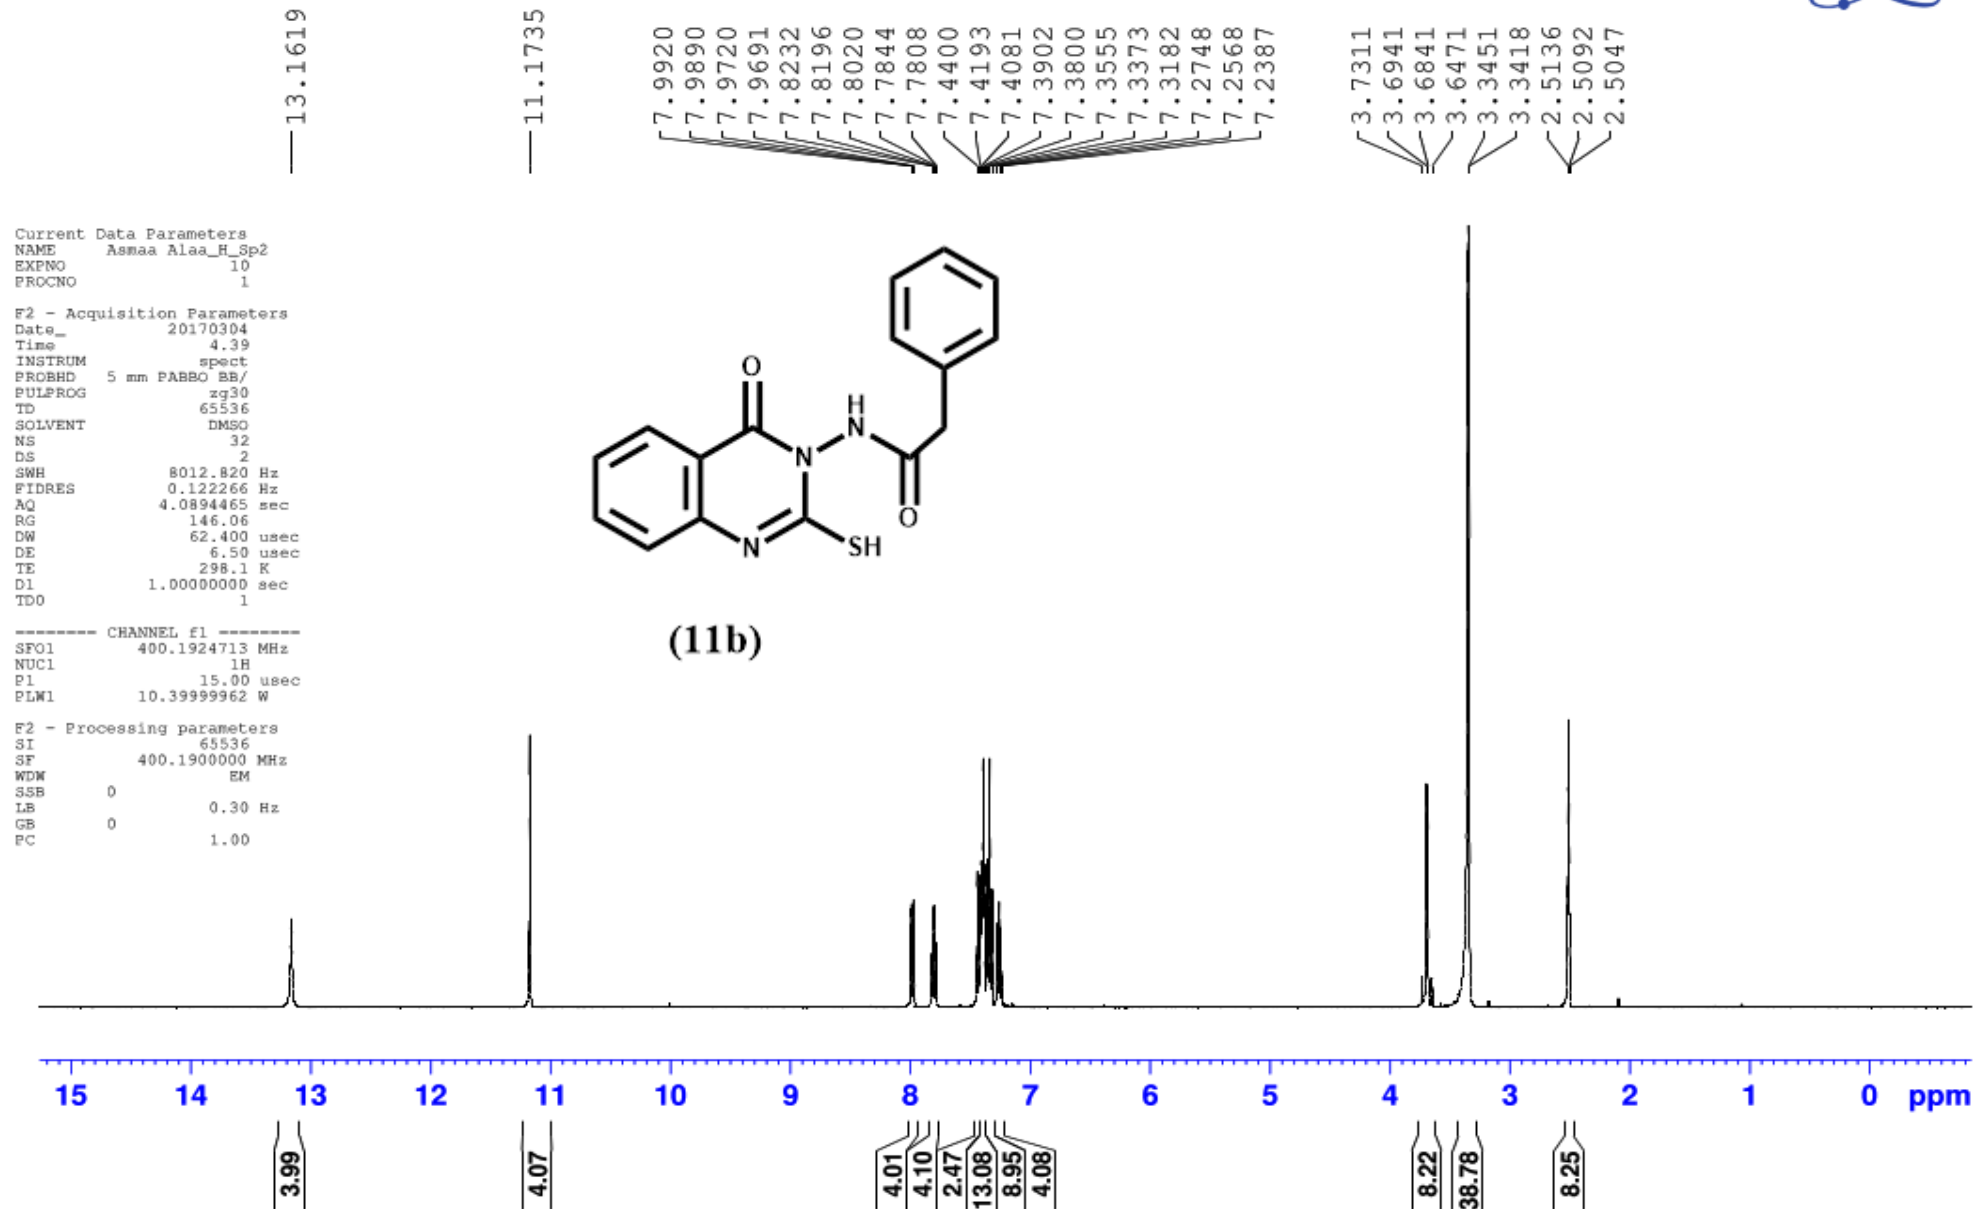

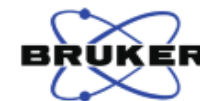

```

Current Data Parameters
NAME      Asmaa Alaa_H_Sp2_D20
EXPNO    10
PROCNO    1

F2 - Acquisition Parameters
Date_     20170305
Time      20.07
INSTRUM   spect
PROBHD    5 mm PABBO BB/
PULPROG   zg30
TD        65536
SOLVENT   DMSO
NS        32
DS        2
SWH       8012.820 Hz
FIDRES    0.122266 Hz
AQ        4.0894465 sec
RG        146.06
DW        62.400 usec
DE        6.50 usec
TE        298.0 K
D1        1.00000000 sec
TDO       1

----- CHANNEL f1 -----
SF01      400.1924713 MHz
NUC1      1H
P1        15.00 usec
PLW1      10.39999962 W

F2 - Processing parameters
SI        65536
SF        400.1900000 MHz
WDW       EM
SSB       0
LB        0.30 Hz
GB        0
PC        1.00
    
```

7.9706  
 7.9671  
 7.9499  
 7.9469  
 7.7916  
 7.7882  
 7.7709  
 7.7527  
 7.7493  
 7.3828  
 7.3712  
 7.3601  
 7.3329  
 7.3151  
 7.2961  
 7.2641  
 7.2462  
 7.2283

3.9201  
 3.6581  
 3.6522  
 2.5152  
 2.5109  
 2.5066

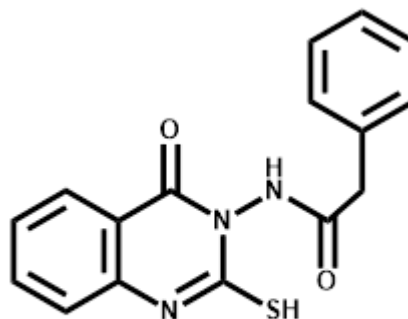

(11b)

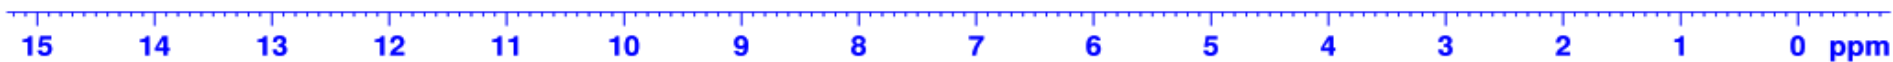

2.54  
 2.66  
 10.40  
 5.69  
 2.50

65.61  
 5.22  
 5.37

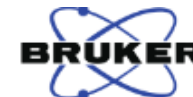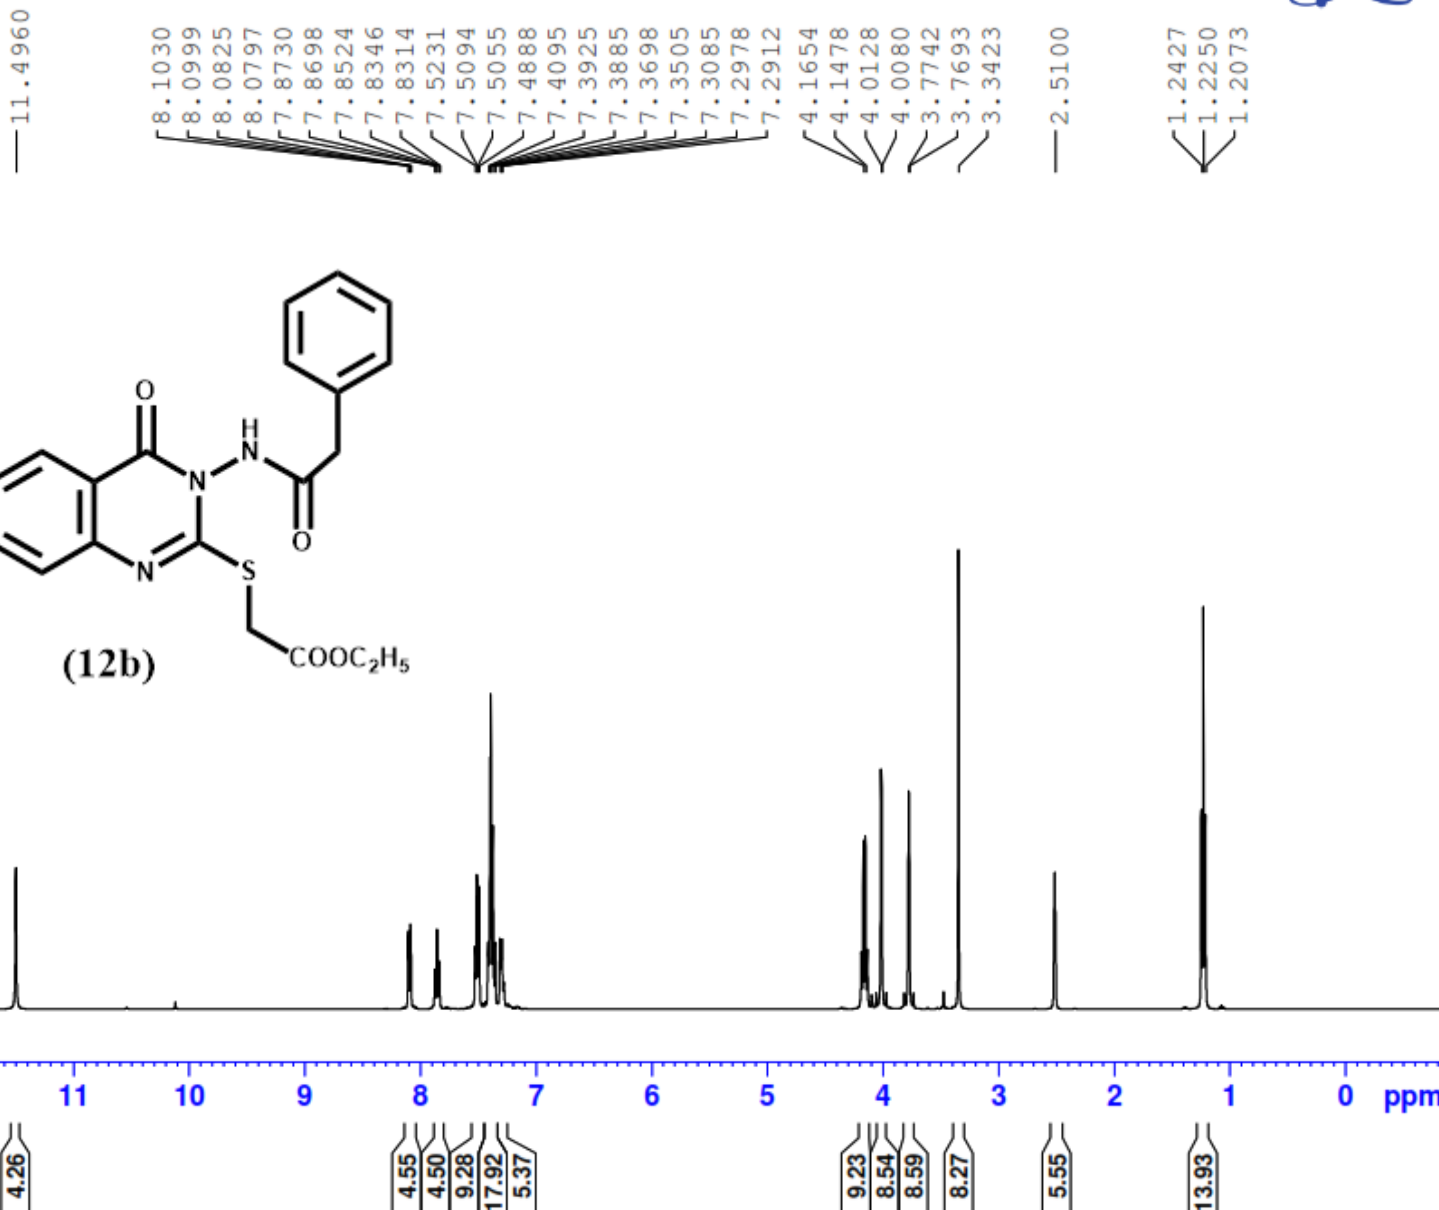

Current Data Parameters  
 NAME Asmaa Alaa\_H\_PH2  
 EXPNO 10  
 PROCNO 1

F2 - Acquisition Parameters  
 Date\_ 20170605  
 Time 12.40  
 INSTRUM spect  
 PROBHD 5 mm PABBO BB/  
 PULPROG zg30  
 TD 65536  
 SOLVENT DMSO  
 NS 32  
 DS 2  
 SWH 8012.820 Hz  
 FIDRES 0.122266 Hz  
 AQ 4.0894465 sec  
 RG 114.95  
 DW 62.400 usec  
 DE 6.50 usec  
 TE 298.0 K  
 D1 1.00000000 sec  
 TD0 1

----- CHANNEL f1 -----  
 SP01 400.1924713 MHz  
 NUC1 1H  
 P1 15.00 usec  
 PLW1 10.39999962 W

F2 - Processing parameters  
 SI 65536  
 SF 400.1900000 MHz  
 MDW EM  
 SSB 0  
 LB 0.30 Hz  
 GB 0  
 PC 1.00

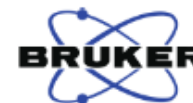

8.0724  
8.0525  
7.8327  
7.8161  
7.8126  
7.5102  
7.4895  
7.4675  
7.3836  
7.3673  
7.3502  
7.3305  
7.2942  
7.2855  
7.2767  
4.1533  
4.1357  
4.1180  
4.1004  
3.9486  
3.9439  
3.7873  
3.7419  
3.7352  
2.5153  
2.5115  
2.5077  
1.2080  
1.1903  
1.1726

Current Data Parameters  
 NAME Asmaa Alaa\_H\_PH2\_D2O  
 EXPNO 10  
 PROCNO 1

F2 - Acquisition Parameters  
 Date\_ 20170605  
 Time 14.25  
 INSTRUM spect  
 PROBHD 5 mm PABBO BB/  
 PULPROG zg30  
 TD 65536  
 SOLVENT DMSO  
 NS 32  
 DS 2  
 SWH 8012.820 Hz  
 FIDRES 0.122266 Hz  
 AQ 4.0894465 sec  
 RG 114.95  
 DW 62.400 usec  
 DE 6.50 usec  
 TE 298.0 K  
 D1 1.00000000 sec  
 TDO 1

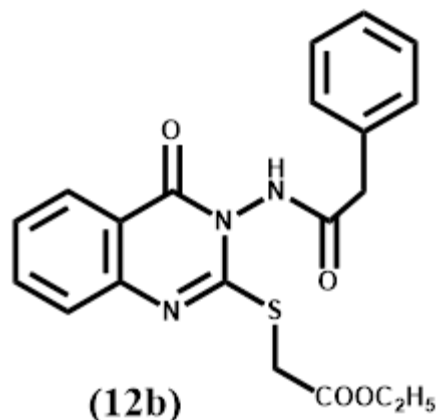

----- CHANNEL f1 -----  
 SF01 400.1924713 MHz  
 NUC1 1H  
 P1 15.00 usec  
 PLW1 10.399999962 W

F2 - Processing parameters  
 SI 65536  
 SF 400.1900000 MHz  
 WDW EM  
 SSB 0  
 LB 0.30 Hz  
 GB 0  
 PC 1.00

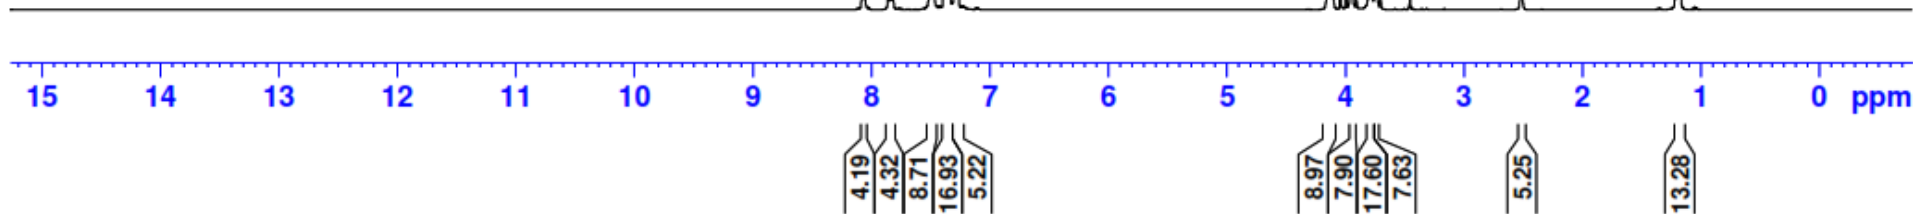

Asmaa Alaa\_H\_PO3#

Microanalytical Unit - FOPCU - NMR laboratory  
www.pharma.cu.edu.eg dir-mau.fopcu@pharma.cu.edu.eg

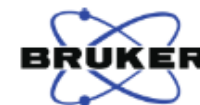

11.4310  
11.4219  
11.4117  
11.1511  
9.3835  
8.1296  
8.1272  
8.1099  
8.1075  
8.0104  
7.9922  
7.8965  
7.8789  
7.8755  
7.7185  
7.7001  
7.6757  
7.6552  
7.6449  
7.6255  
7.6071  
7.5524  
7.5330  
4.3401  
3.9887  
3.9459  
3.9098  
3.8540  
3.8179  
3.3369  
2.5137  
2.5097  
2.5057

Current Data Parameters  
NAME Asmaa Alaa\_H\_PO3#  
EXPNO 10  
PROCNO 1

F2 - Acquisition Parameters  
Date\_ 20180102  
Time 17.53  
INSTRUM spect  
PROBHD 5 mm PABBO BB/  
PULPROG zg30  
TD 65536  
SOLVENT DMSO  
NS 32  
DS 2  
SWH 8012.820 Hz  
FIDRES 0.122266 Hz  
AQ 4.0894465 sec  
RG 169.46  
DN 62.400 usec  
DE 6.50 usec  
TE 298.0 K  
D1 1.00000000 sec  
TD0 1

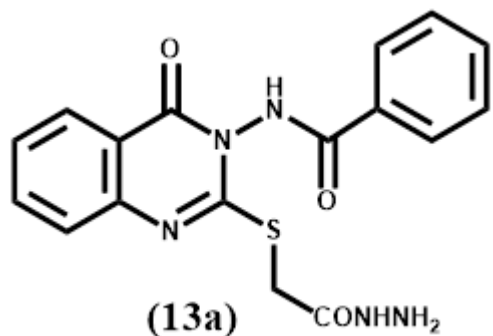

----- CHANNEL f1 -----  
SF01 400.1924713 MHz  
NUC1 1H  
P1 15.00 usec  
PLW1 10.39999962 W

F2 - Processing parameters  
SI 65536  
SF 400.1900000 MHz  
WDW EM  
SSB 0  
LB 0.30 Hz  
GB 0  
PC 1.00

16 15 14 13 12 11 10 9 8 7 6 5 4 3 2 1 0 ppm

3.51  
4.57  
5.79  
10.16  
5.20  
20.74  
5.18  
9.16  
10.69  
17.53  
7.49

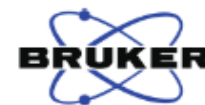

Current Data Parameters  
 NAME Asmaa Alaa\_H\_PO3#\_D20  
 EXPNO 10  
 PROCNO 1

F2 - Acquisition Parameters  
 Date\_ 20180103  
 Time 13.55  
 INSTRUM spect  
 PROBHD 5 mm PABBO BB/  
 PULPROG zg30  
 TD 65536  
 SOLVENT DMSO  
 NS 32  
 DS 2  
 SWH 8012.820 Hz  
 FIDRES 0.122266 Hz  
 AQ 4.0894465 sec  
 RG 169.46  
 DW 62.400 usec  
 DE 6.50 usec  
 TE 298.1 K  
 D1 1.00000000 sec  
 TD0 1

----- CHANNEL f1 -----  
 SFO1 400.1924713 MHz  
 NUC1 1H  
 P1 15.00 usec  
 PLW1 10.39999962 W

F2 - Processing parameters  
 SI 65536  
 SF 400.1900000 MHz  
 MDW EM  
 SSB 0  
 LB 0.30 Hz  
 GB 0  
 PC 1.00

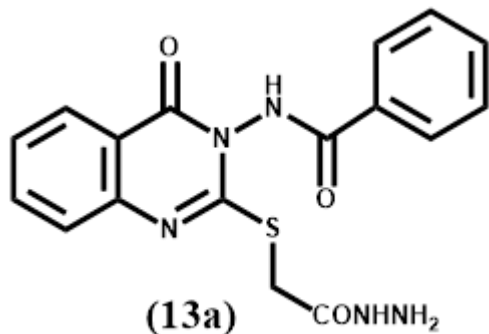

8.1022  
 8.0995  
 8.0824  
 8.0798  
 7.9683  
 7.9503  
 7.9471  
 7.8938  
 7.8903  
 7.8729  
 7.8553  
 7.8518  
 7.7225  
 7.7041  
 7.6855  
 7.6705  
 7.6502  
 7.6248  
 7.6053  
 7.5868  
 7.5416  
 7.5220  
 7.5040  
 3.9345  
 3.9047  
 3.8854  
 3.8685  
 3.8218  
 3.7851  
 2.5156  
 2.5115  
 2.5074

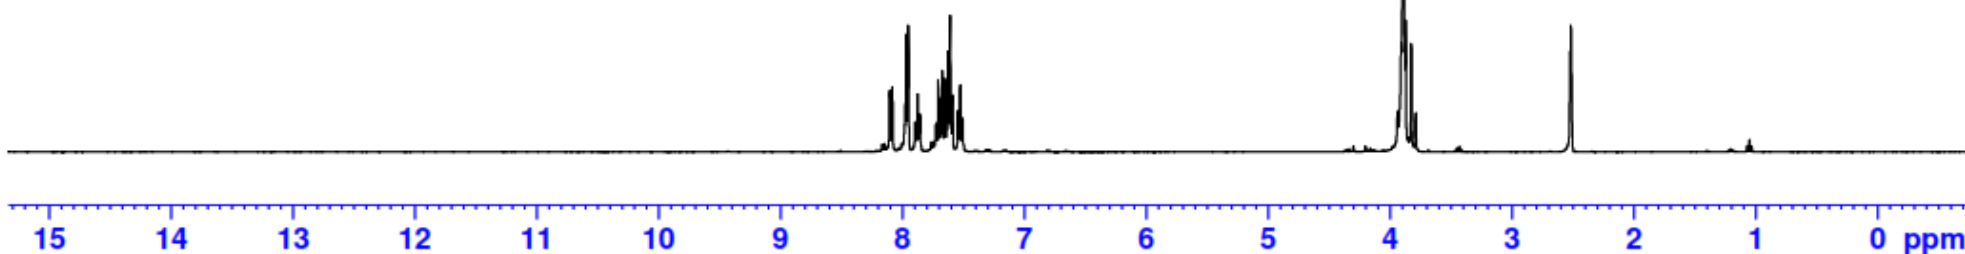

4.22  
 8.67  
 4.59  
 9.19  
 8.90  
 4.45  
 48.93  
 3.70  
 1.25  
 6.10



Asmaa Alaa\_C\_Po3

Microanalytical Unit - FOPCU - NMR laboratory  
www.pharma.cu.edu.eg dir-mau.fopcu@pharma.cu.edu.eg

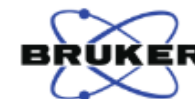

166.74  
166.32  
159.12  
158.92  
147.15  
135.87  
133.50  
131.47  
129.37  
128.32  
127.14  
126.90  
126.86  
119.74

40.61  
40.40  
40.19  
39.98  
39.77  
39.56  
39.35  
33.95

Current Data Parameters  
NAME Asmaa Alaa\_C\_Po3  
EXPNO 10  
PROCNO 1

F2 - Acquisition Parameters

Date\_ 20180111  
Time 18.20  
INSTRUM spect  
PROBHD 5 mm PABBO BB/  
PULPROG zgpg30  
TD 65536  
SOLVENT DMSO  
NS 1200  
DS 4  
SWH 24038.461 Hz  
FIDRES 0.366798 Hz  
AQ 1.3631488 sec  
RG 202.37  
DW 20.800 usec  
DE 6.50 usec  
TE 298.0 K  
D1 2.00000000 sec  
D11 0.03000000 sec  
TDO 1

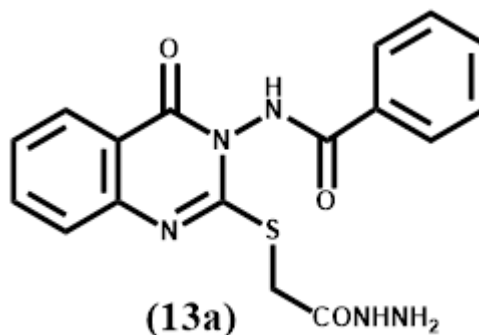

==== CHANNEL f1 =====  
SFO1 100.6379178 MHz  
NUC1 13C  
P1 10.00 usec  
PLW1 45.00000000 W

==== CHANNEL f2 =====  
SFO2 400.1916008 MHz  
NUC2 1H  
CPDPRG[2] waltz16

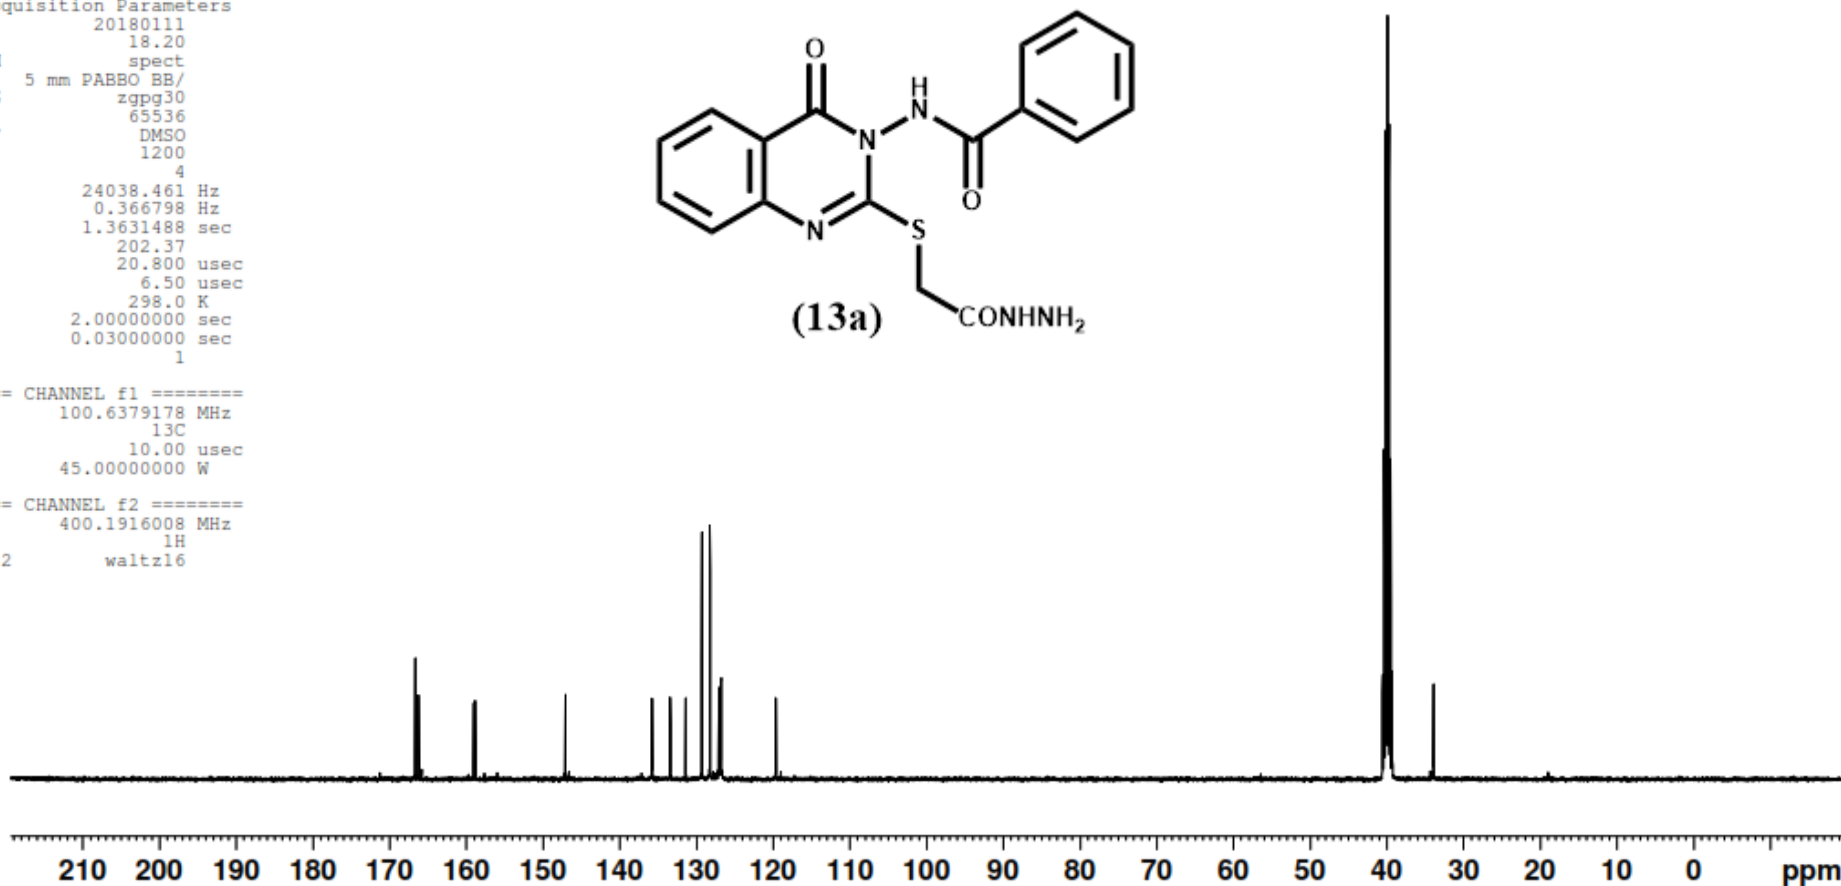

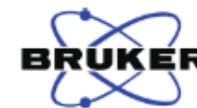

— 11.2293  
 9.3610  
 8.0937  
 8.0762  
 8.0740  
 7.8788  
 7.8613  
 7.8437  
 7.8404  
 7.6309  
 7.6107  
 7.5197  
 7.5015  
 7.4834  
 7.3455  
 7.3041  
 7.2873  
 4.3303  
 4.3165  
 3.9191  
 3.8827  
 3.8088  
 3.7657  
 3.3427  
 — 2.5098

Current Data Parameters  
 NAME Asmaa Alaa\_H\_PH1  
 EXPNO 21  
 PROCNO 1

F2 - Acquisition Parameters  
 Date\_ 20170605  
 Time 12.30  
 INSTRUM spect  
 PROBHD 5 mm FAPBO BB/  
 PULPROG zg30  
 TD 65536  
 SOLVENT DMSO  
 NS 32  
 DS 2  
 SMH 8012.820 Hz  
 FIDRES 0.122266 Hz  
 AQ 4.0894465 sec  
 RG 129.43  
 DW 62.400 usec  
 DE 6.50 usec  
 TE 298.0 K  
 D1 1.00000000 sec  
 TDO 1

----- CHANNEL f1 -----  
 SF01 400.1924713 MHz  
 NUC1 1H  
 P1 15.00 usec  
 PLW1 10.39999962 W

F2 - Processing parameters  
 SI 65536  
 SF 400.1900000 MHz  
 WDW EM  
 SSB 0  
 LB 0.30 Hz  
 GB 0  
 PC 1.00

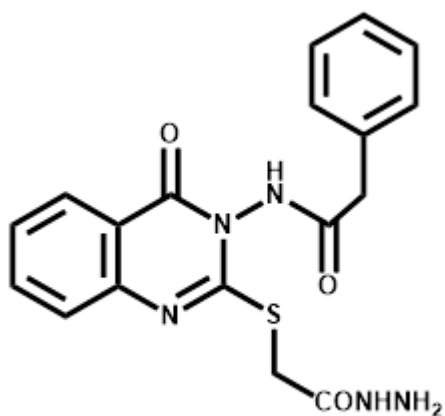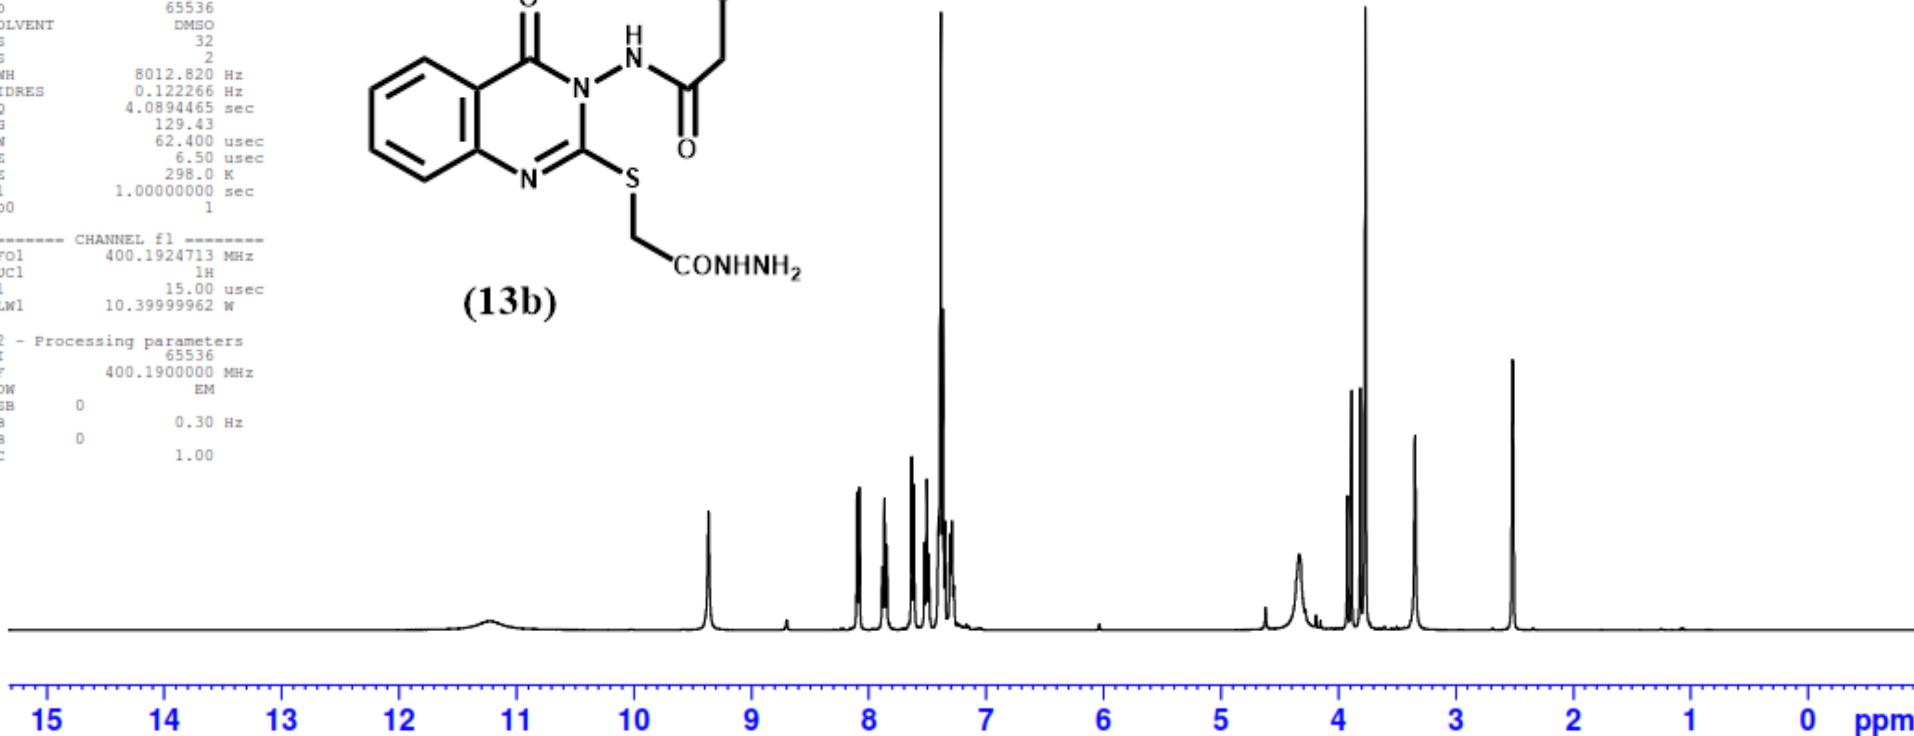

4.13  
 4.68  
 5.18  
 5.28  
 5.32  
 5.48  
 21.18  
 5.51  
 8.46  
 5.36  
 15.44  
 6.56  
 7.43

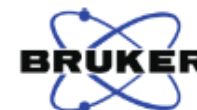

Current Data Parameters  
 NAME Asmaa Alaa\_R\_PH1\_D2O  
 EXPNO 21  
 PROCNO 1

F2 - Acquisition Parameters  
 Date\_ 20170618  
 Time 15.53  
 INSTRUM spect  
 PROBHD 5 mm PABBO BB/  
 PULPROG zg30  
 TD 65536  
 SOLVENT DMSO  
 NS 32  
 DS 2  
 SWH 8012.820 Hz  
 FIDRES 0.122266 Hz  
 AQ 4.0894465 sec  
 RG 64.21  
 DN 62.400 usec  
 DE 6.50 usec  
 TE 298.1 K  
 D1 1.00000000 sec  
 TD0 1

----- CHANNEL f1 -----  
 SFO1 400.1924713 MHz  
 NUC1 1H  
 P1 15.00 usec  
 PLW1 10.39999962 W

F2 - Processing parameters  
 SI 65536  
 SF 400.1900000 MHz  
 WDW EM  
 SSB 0  
 LB 0.30 Hz  
 GB 0  
 PC 1.00

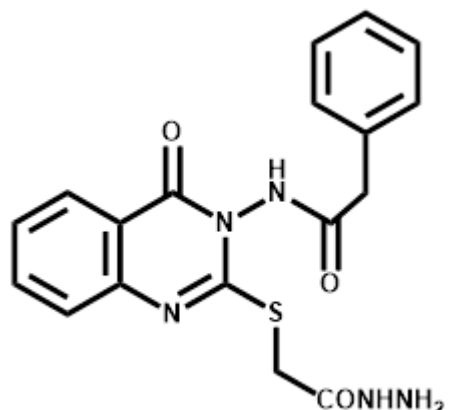

(13b)

8.0574  
 8.0398  
 8.0376  
 7.8511  
 7.8479  
 7.8303  
 7.8127  
 7.8095  
 7.6178  
 7.5974  
 7.5035  
 7.4848  
 7.4665  
 7.3706  
 7.3573  
 7.3514  
 7.3422  
 7.3222  
 7.2936  
 7.2876  
 7.2803  
 7.2722  
 7.2636  
 7.2572  
 3.9389  
 3.8732  
 3.8362  
 3.7639  
 3.7265  
 — 2.5122

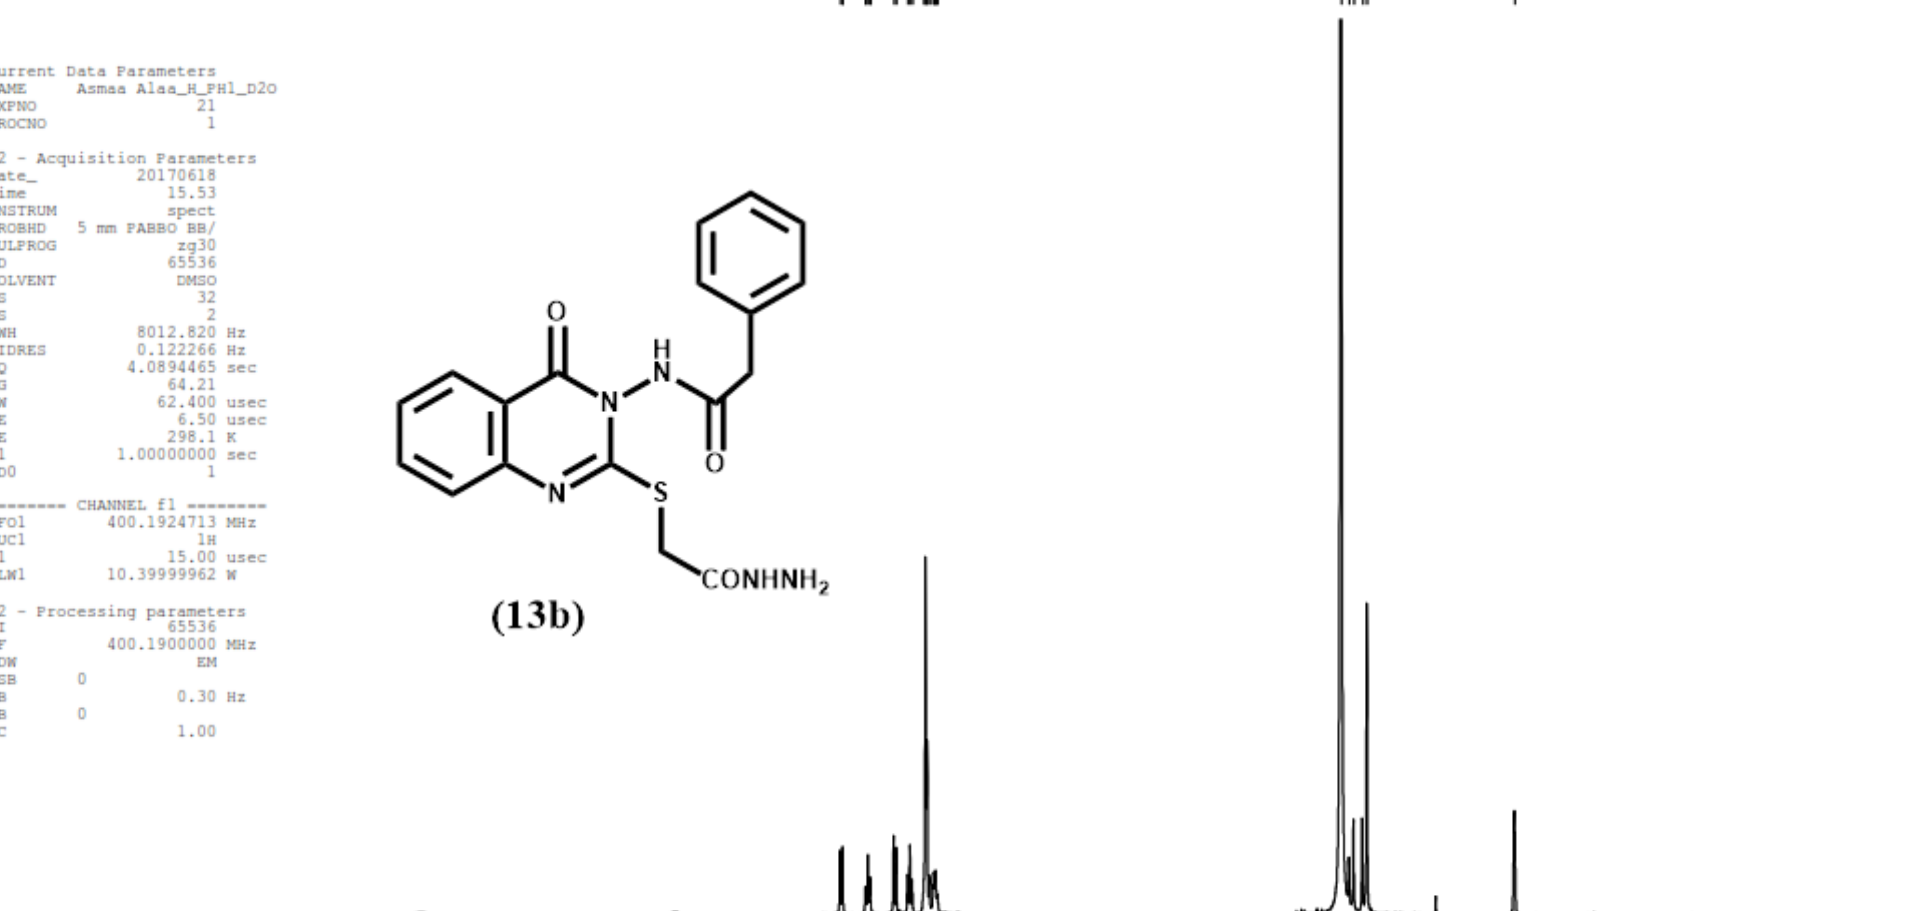

14 13 12 11 10 9 8 7 6 5 4 3 2 1 0 ppm

2.02  
 2.08  
 2.05  
 2.10  
 7.98  
 2.12

73.38  
 5.94

2.34

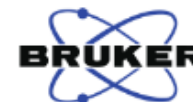

170.55  
 166.77  
 158.85  
 158.72  
 147.05  
 135.79  
 134.90  
 129.76  
 128.84  
 127.29  
 127.10  
 126.83  
 126.78  
 119.67  
 40.55  
 40.34  
 40.13  
 39.92  
 39.71  
 39.50  
 39.29  
 33.89

Current Data Parameters  
 NAME Asmaa Alaa\_C\_PH1  
 EXPNO 21  
 PROCNO 1

F2 - Acquisition Parameters  
 Date\_ 20170616  
 Time 8.01  
 INSTRUM spect  
 PROBHD 5 mm PABBO BB/  
 PULPROG zgpg30  
 TD 65536  
 SOLVENT DMSO  
 NS 1200  
 DS 4  
 SWH 24038.461 Hz  
 FIDRES 0.366798 Hz  
 AQ 1.3631488 sec  
 RG 202.37  
 DW 20.800 usec  
 DE 6.50 usec  
 TE 298.1 K  
 D1 2.00000000 sec  
 D11 0.03000000 sec  
 TD0 1

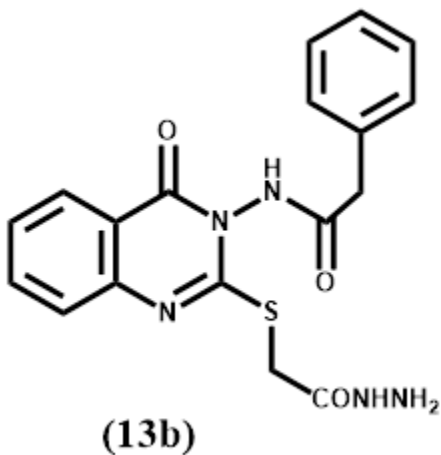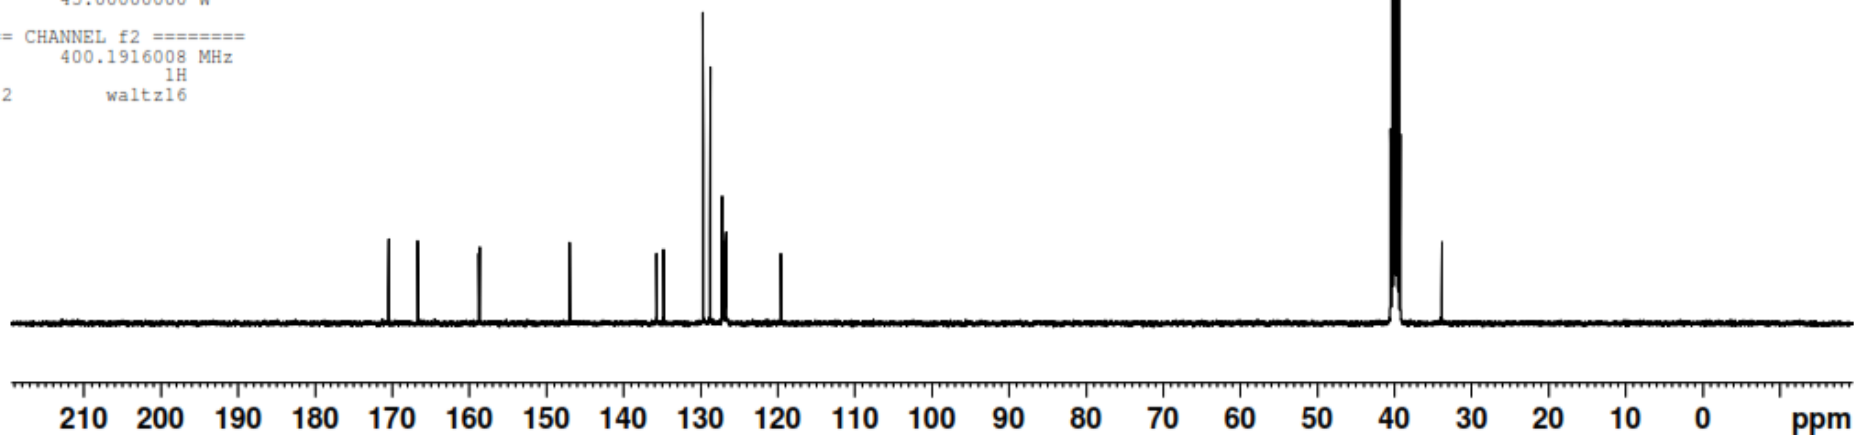

===== CHANNEL f1 =====  
 SFO1 100.6379178 MHz  
 NUC1 13C  
 P1 10.00 usec  
 PLW1 45.00000000 W  
 ===== CHANNEL f2 =====  
 SFO2 400.1916008 MHz  
 NUC2 1H  
 CPDPRG[2] waltz16

asmaa alaa Ph1-M-carbon

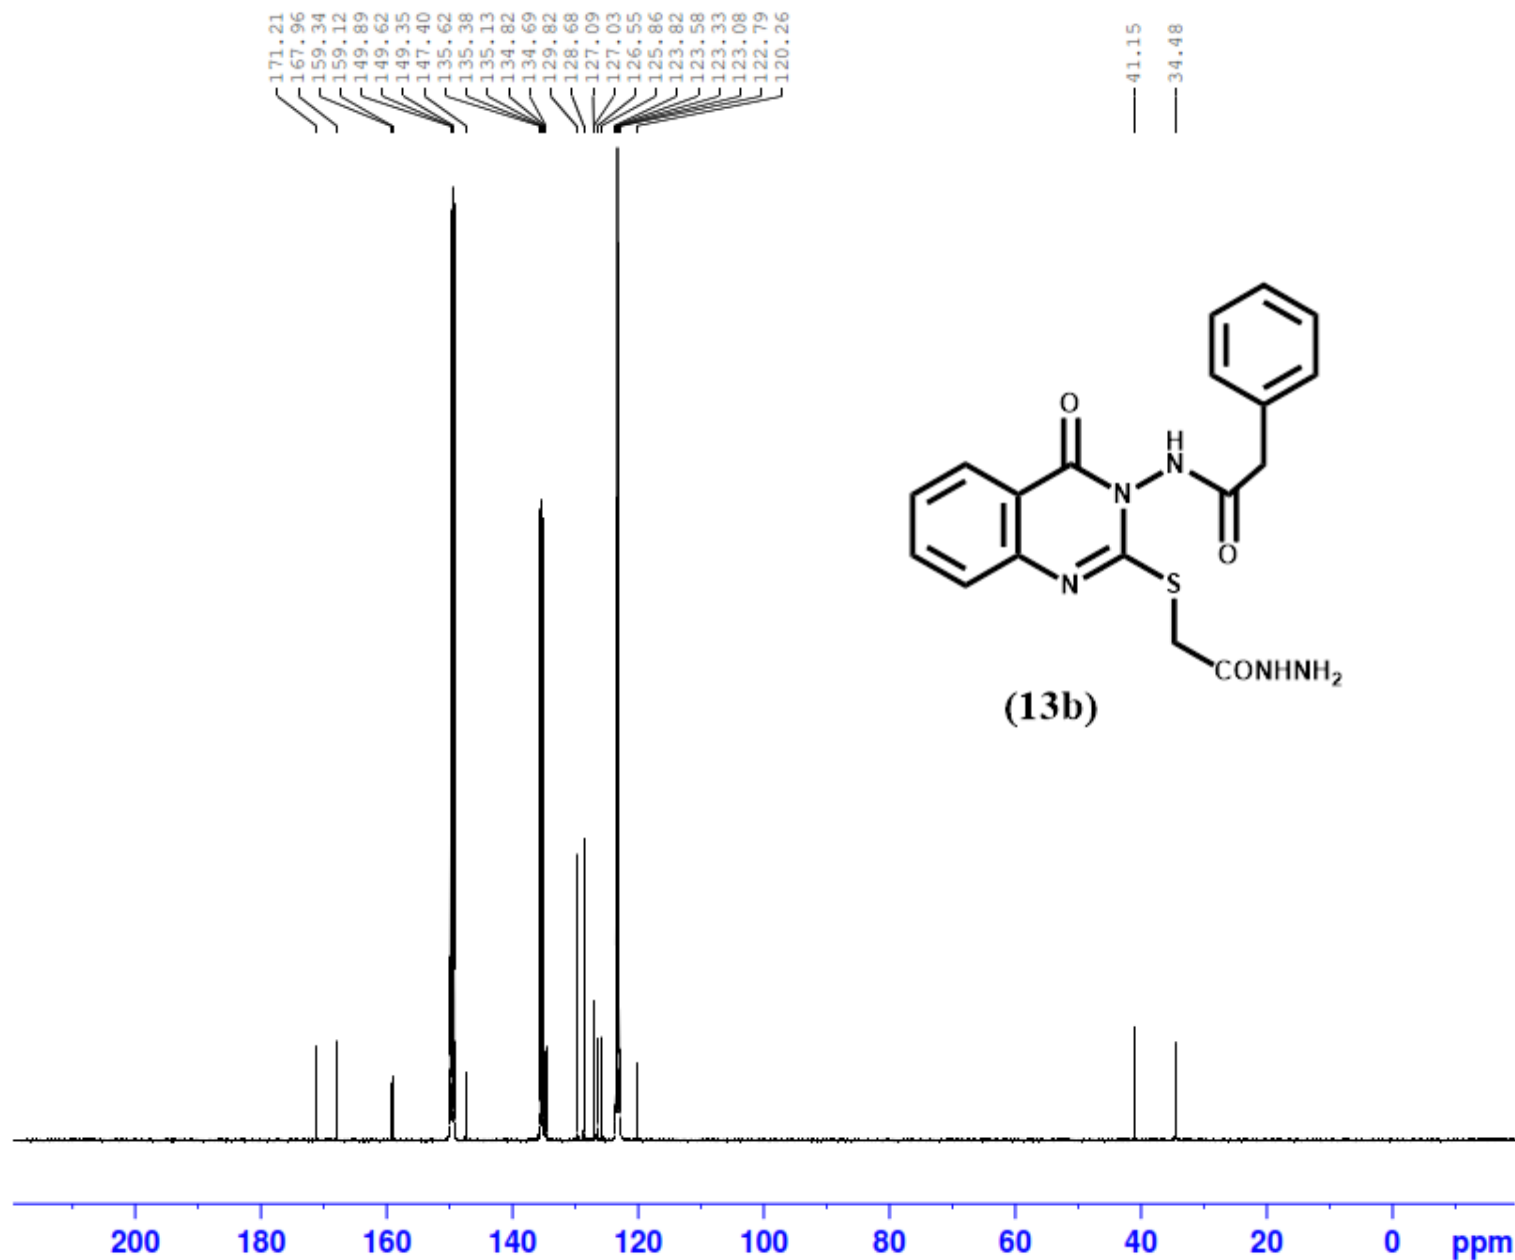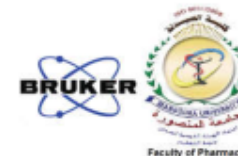

Current Data Parameters  
NAME asmaa alaa Ph1-M  
EXPNO 10  
PROCNO 1

F2 - Acquisition Parameters  
Date\_ 20180507  
Time 21.32 h  
INSTRUM spect  
PROBHD Z108618\_0945 (   
PULPROG zgpg30  
TD 65536  
SOLVENT Pyr  
NS 2100  
DS 4  
SWH 24038.461 Hz  
FIDRES 0.733596 Hz  
AQ 1.3631488 sec  
RG 197.77  
DW 20.800 usec  
DE 6.50 usec  
TE 293.9 K  
D1 2.00000000 sec  
D11 0.03000000 sec  
TD0 1  
SFO1 100.6404331 MHz  
NUC1 13C  
P1 10.00 usec  
PLW1 47.00000000 W  
SFO2 400.2016008 MHz  
NUC2 1H  
CPDPRG[2] waltz16  
PCPD2 90.00 usec  
PLW2 13.00000000 W  
PLW12 0.29249999 W  
PLW13 0.14713000 W

F2 - Processing parameters  
SI 32768  
SF 100.6303700 MHz  
WDW EM  
SSB 0  
LB 1.00 Hz  
GB 0  
PC 1.40

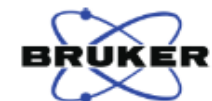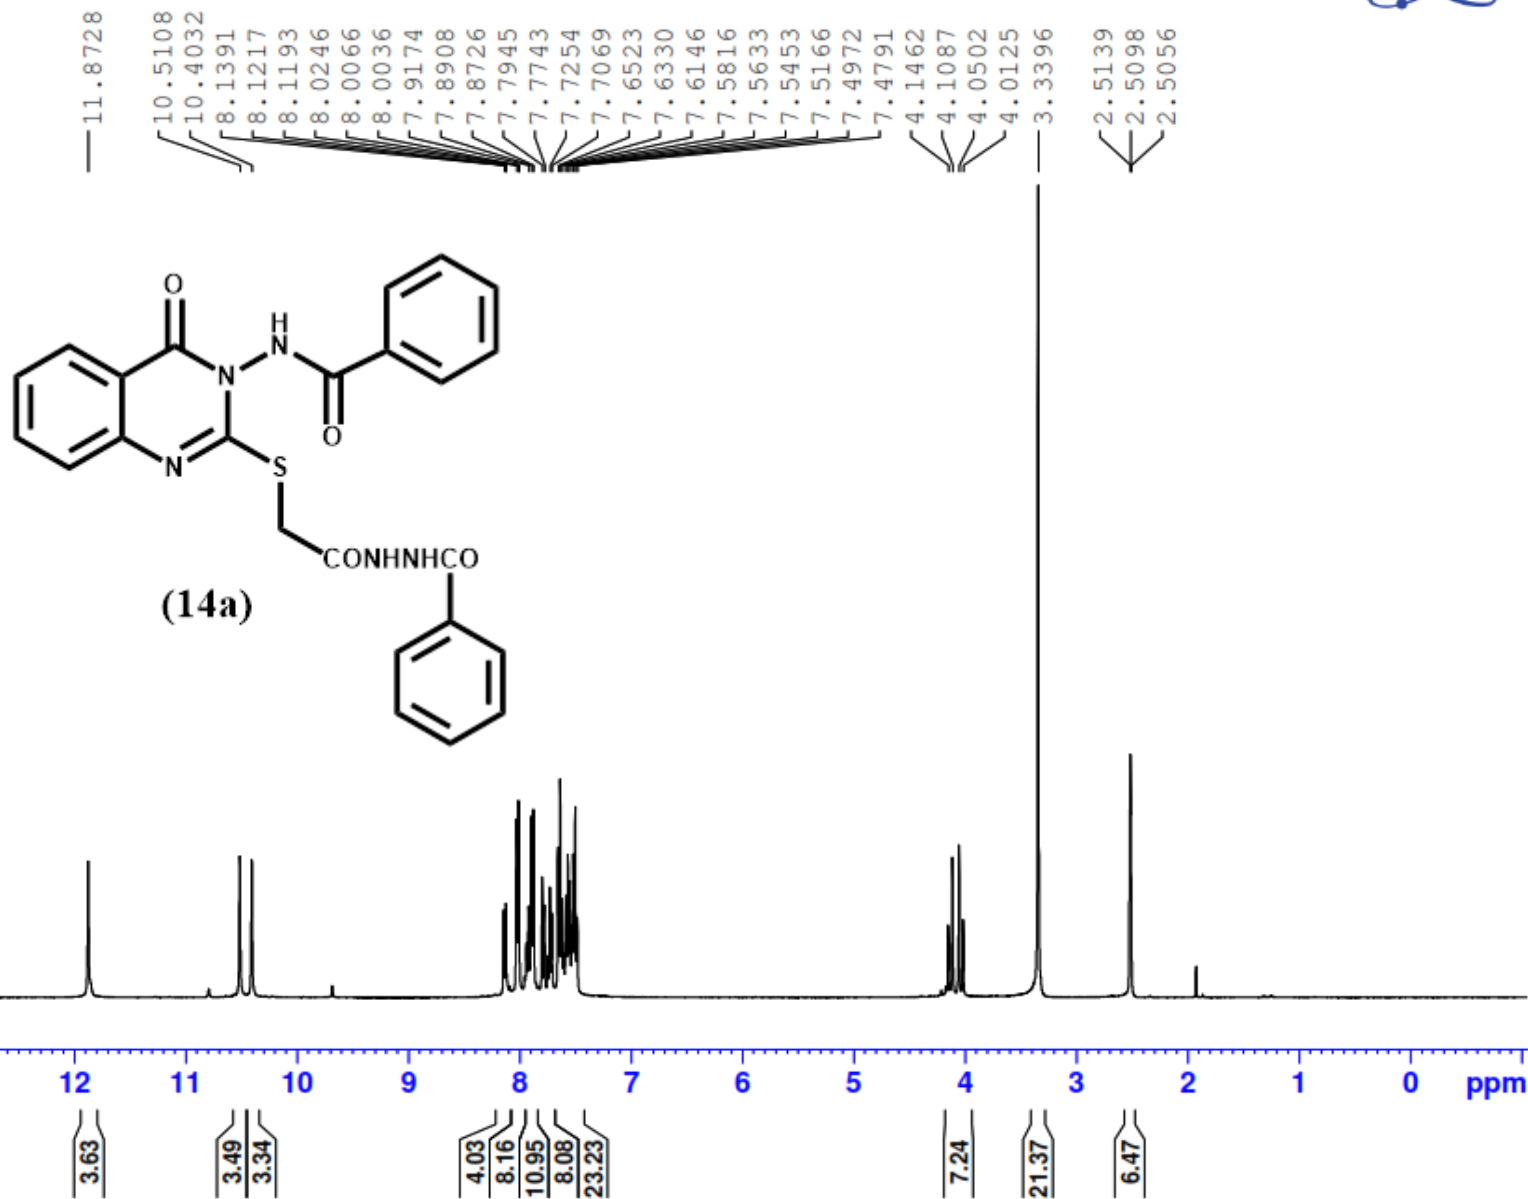

Current Data Parameters  
 NAME Asmaa Alaa\_H\_PO4  
 EXPNO 10  
 PROCNO 1

F2 - Acquisition Parameters  
 Date\_ 20180102  
 Time 17.58  
 INSTRUM spect  
 PROBHD 5 mm FAPBO BB/  
 PULPROG zg30  
 TD 65536  
 SOLVENT DMSO  
 NS 32  
 DS 2  
 SWH 8012.820 Hz  
 FIDRES 0.122266 Hz  
 AQ 4.0894465 sec  
 RG 169.46  
 DW 62.400 usec  
 DE 6.50 usec  
 TE 298.0 K  
 D1 1.00000000 sec  
 TDO 1

----- CHANNEL f1 -----  
 SF01 400.1924713 MHz  
 NUC1 1H  
 P1 15.00 usec  
 PLW1 10.39999962 W

F2 - Processing parameters  
 SI 65536  
 SF 400.1900000 MHz  
 MDM EM  
 SSB 0  
 LB 0.30 Hz  
 GB 0  
 PC 1.00

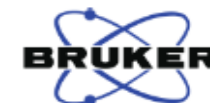

Current Data Parameters  
 NAME Asmaa Alaa\_H\_PO4\_D2O  
 EXPNO 10  
 PROCNO 1

F2 - Acquisition Parameters  
 Date\_ 20180114  
 Time 13.12  
 INSTRUM spect  
 PROBHD 5 mm PABBO BB/  
 PULPROG zg30  
 TD 65536  
 SOLVENT DMSO  
 NS 32  
 DS 2  
 SWH 8012.820 Hz  
 FIDRES 0.122266 Hz  
 AQ 4.0894465 sec  
 RG 114.95  
 DW 62.400 usec  
 DE 6.50 usec  
 TE 298.0 K  
 D1 1.00000000 sec  
 TD0 1

----- CHANNEL f1 -----  
 SFOL 400.1924713 MHz  
 NUC1 1H  
 P1 15.00 usec  
 PLW1 10.39999962 W

F2 - Processing parameters  
 SI 65536  
 SF 400.1900000 MHz  
 WDW EM  
 SSB 0  
 LB 0.30 Hz  
 GB 0  
 PC 1.00

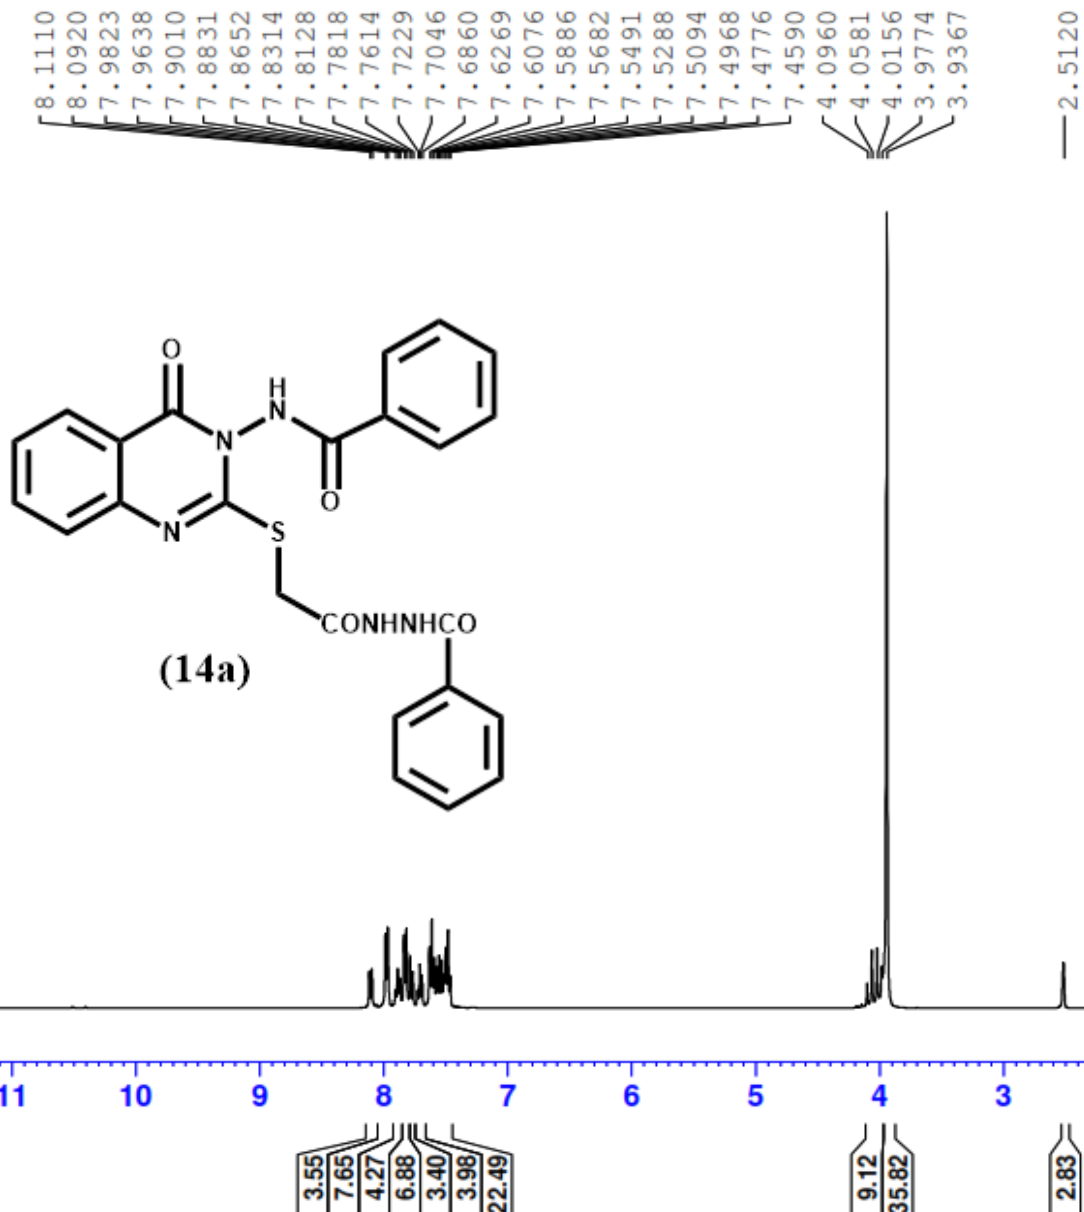

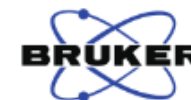

166.83  
 166.33  
 165.82  
 158.94  
 158.87  
 147.19  
 135.85  
 133.53  
 132.82  
 132.32  
 131.43  
 129.39  
 128.92  
 128.32  
 127.94  
 127.16  
 127.10  
 126.90  
 119.75

40.61  
 40.40  
 40.19  
 39.98  
 39.78  
 39.57  
 39.36  
 33.83

Current Data Parameters  
 NAME Asmaa Alaa\_C\_Po4  
 EXPNO 10  
 PROCNO 1

F2 - Acquisition Parameters  
 Date\_ 20180111  
 Time 20.42  
 INSTRUM spect  
 PROBHD 5 mm PABBO BB/  
 PULPROG zgpg30  
 TD 65536  
 SOLVENT DMSO  
 NS 1200  
 DS 4  
 SWH 24038.461 Hz  
 FIDRES 0.366798 Hz  
 AQ 1.3631488 sec  
 RG 202.37  
 DW 20.800 usec  
 DE 6.50 usec  
 TE 298.0 K  
 D1 2.00000000 sec  
 D11 0.03000000 sec  
 TD0 1

==== CHANNEL f1 =====  
 SFO1 100.6379178 MHz  
 NUC1 13C  
 P1 10.00 usec  
 PLW1 45.00000000 W

==== CHANNEL f2 =====  
 SFO2 400.1916008 MHz  
 NUC2 1H  
 CPDPRG[2] waltz16

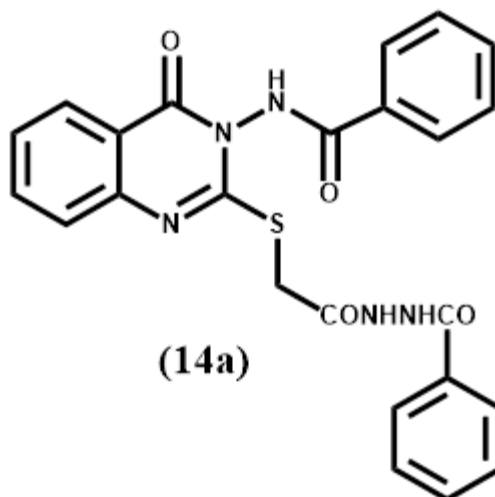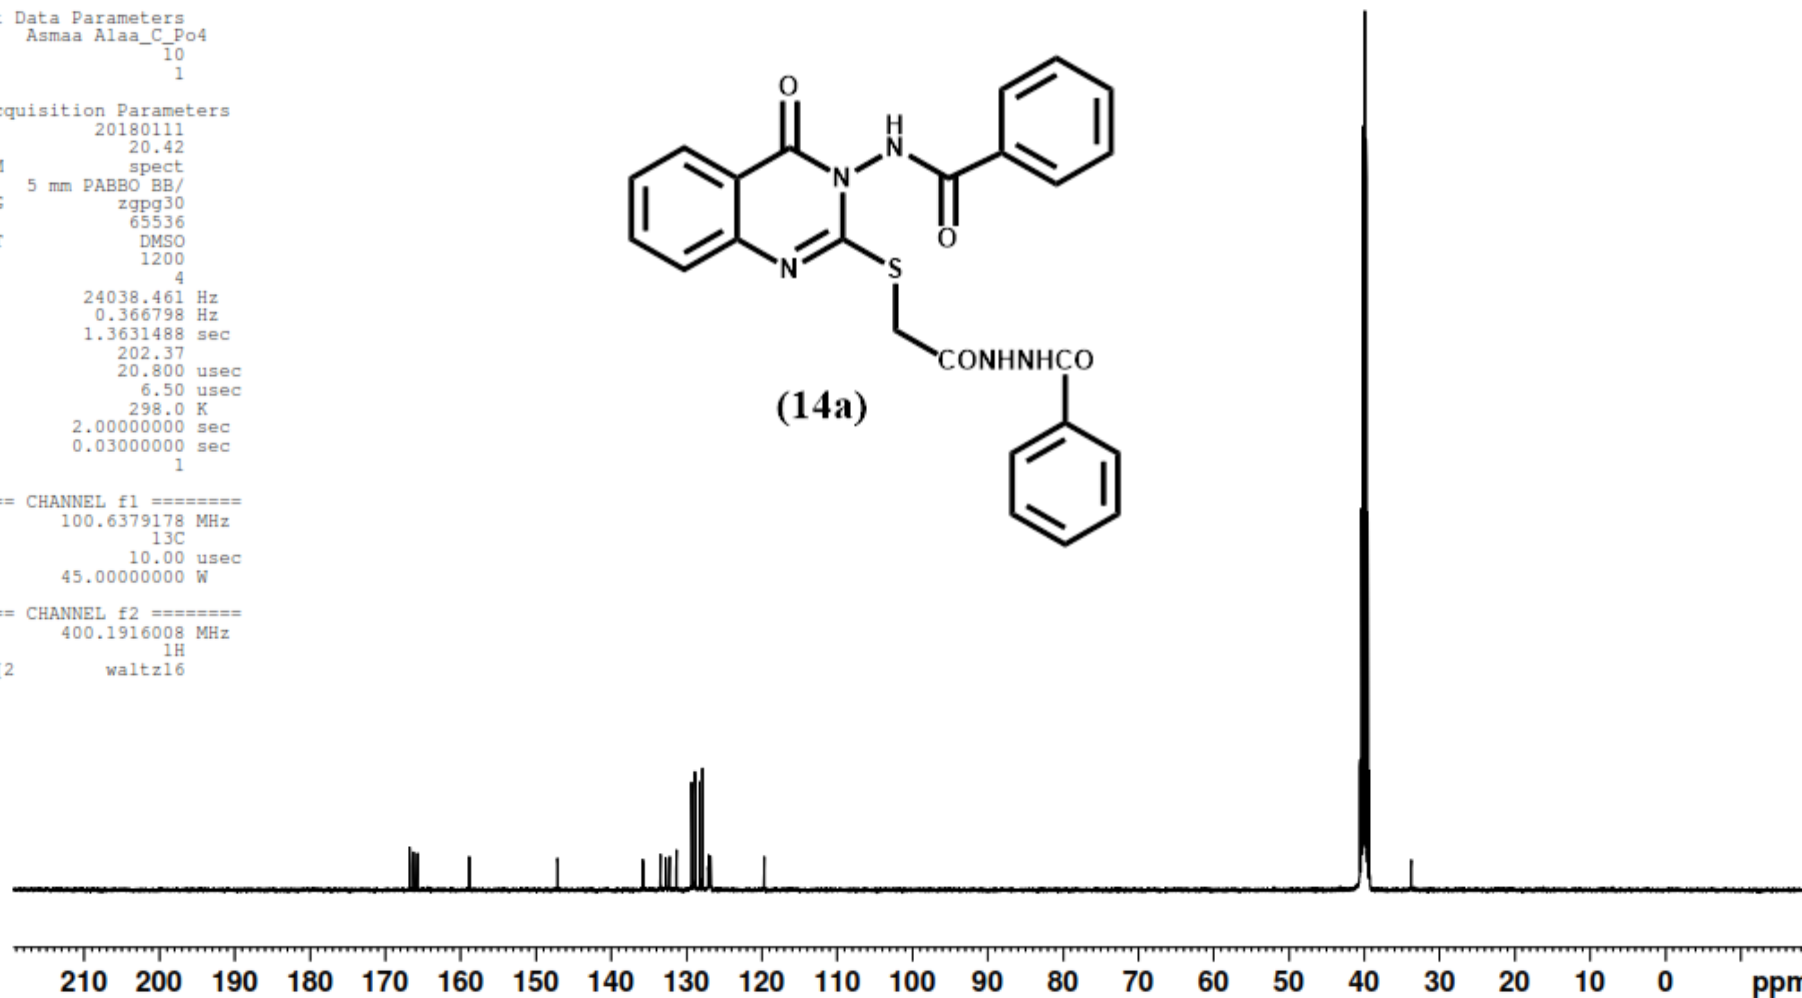



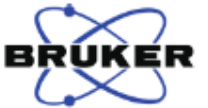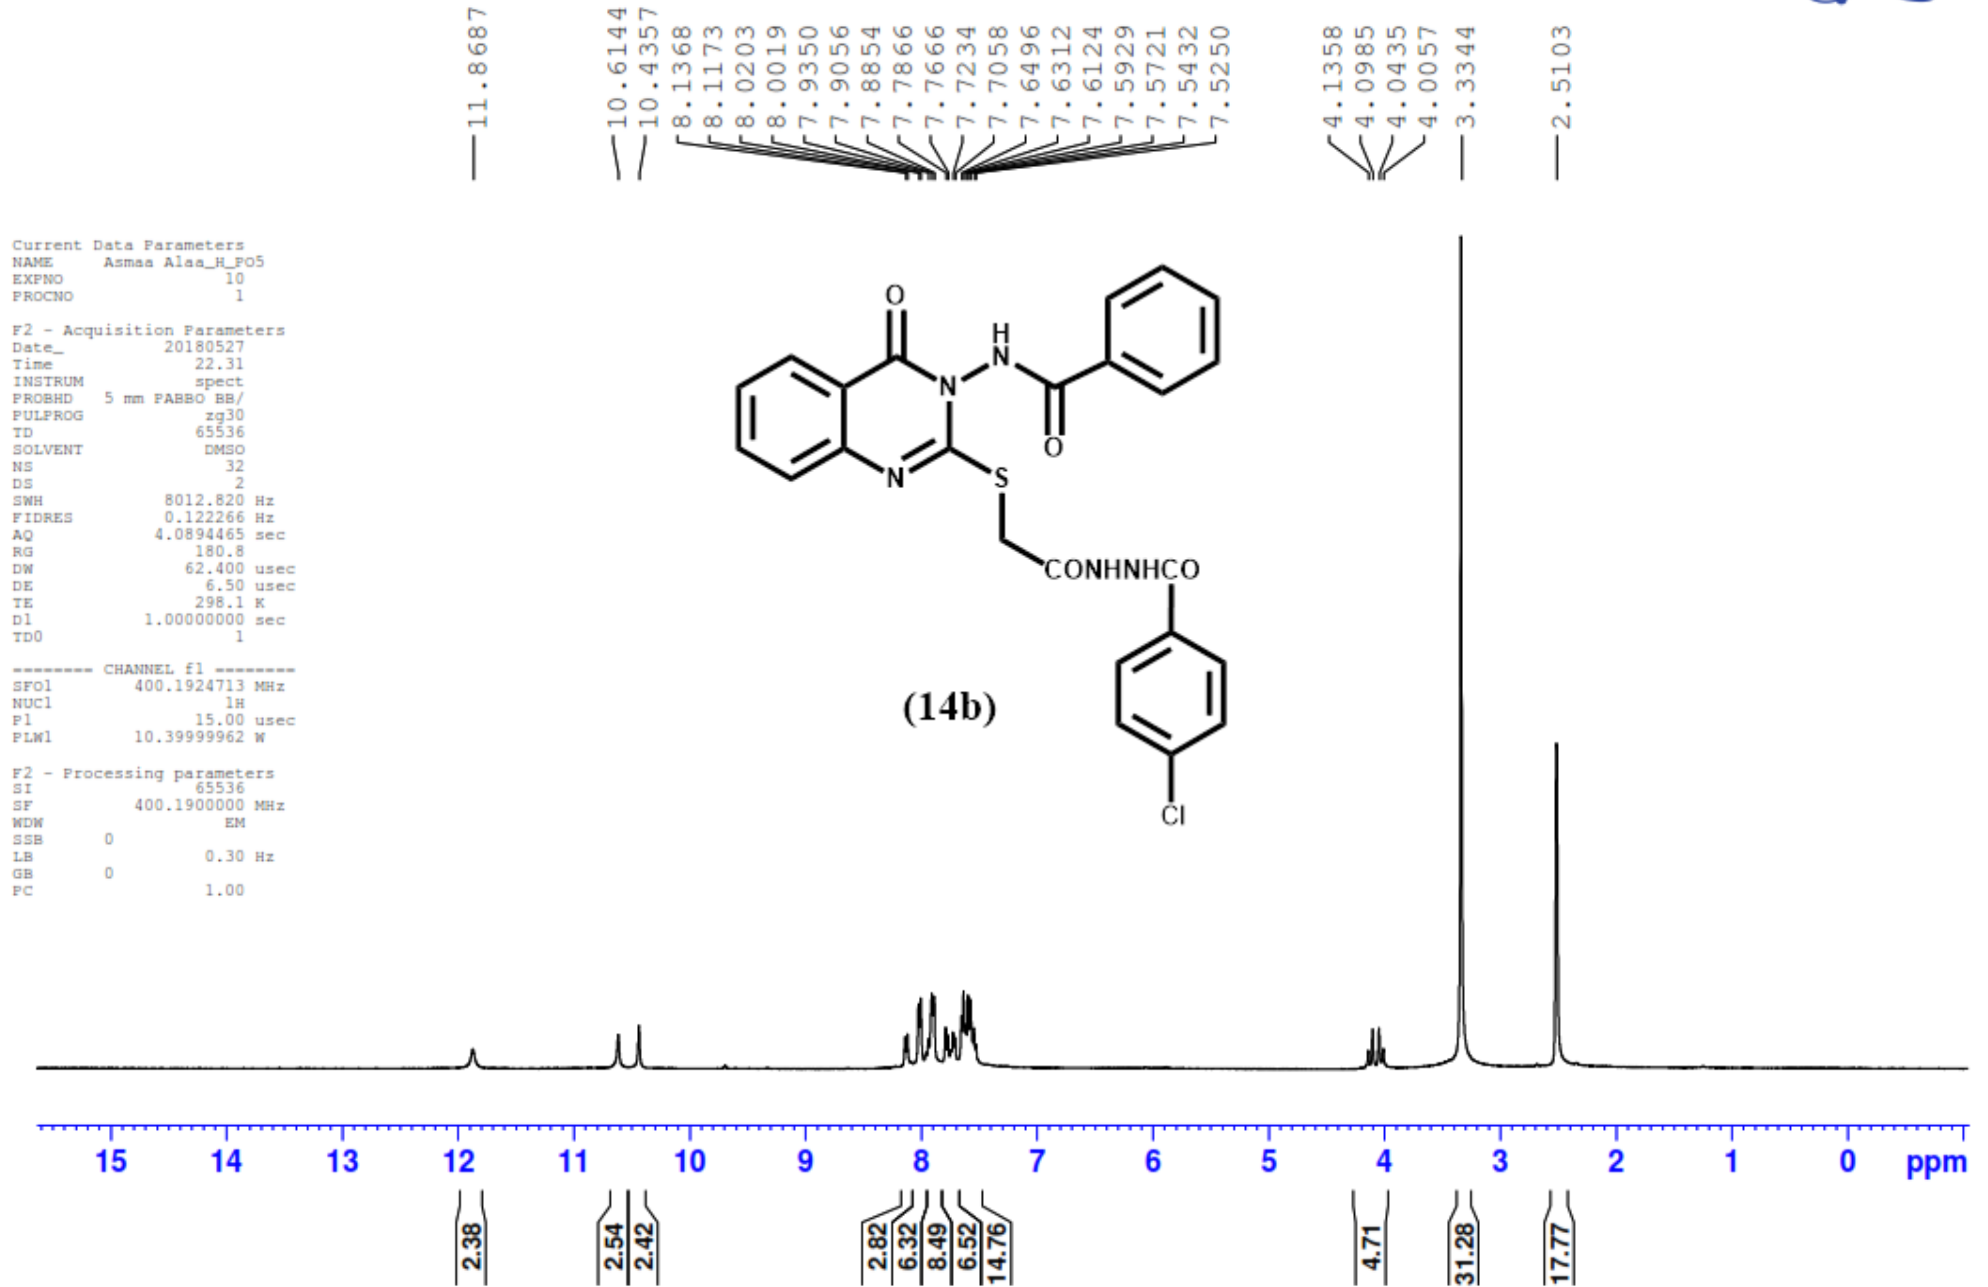

asmaa sakr-po5- carbon

166.89  
166.40  
164.86  
158.95  
158.86  
147.18  
137.20  
135.82  
133.50  
131.52  
129.88  
129.38  
129.24  
129.18  
129.09  
128.33  
127.15  
127.09  
126.89  
119.74

40.32  
40.11  
39.90  
39.69  
39.49  
33.79

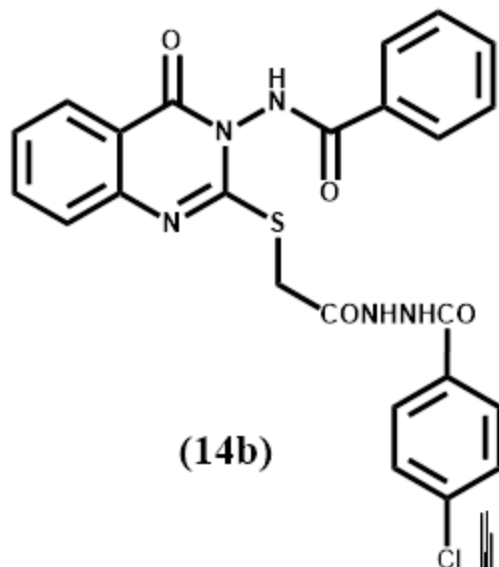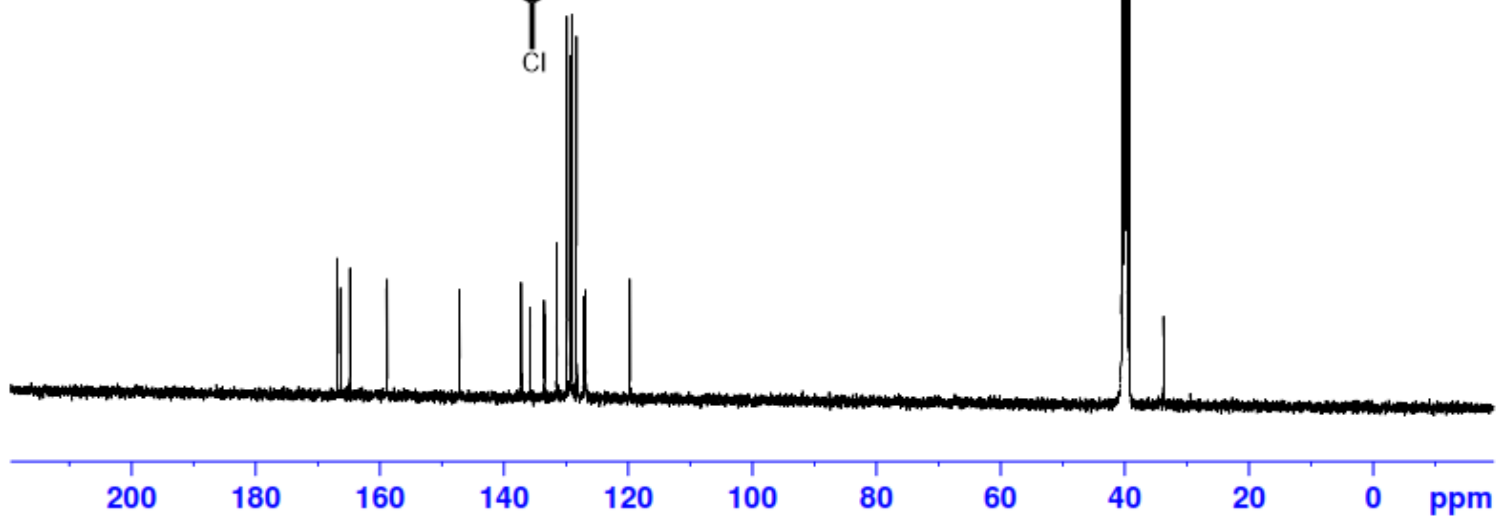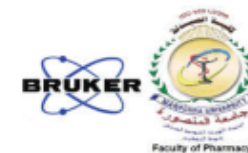

Current Data Parameters  
NAME asmaa sakr-PO5-SS  
EXPNO 20  
PROCNO 1

F2 - Acquisition Parameters  
Date\_ 20180505  
Time 12.57 h  
INSTRUM spect  
PROBHD Z108618\_0945 (   
PULPROG zgpg30  
TD 65536  
SOLVENT DMSO  
NS 1024  
DS 4  
SWH 24038.461 Hz  
FIDRES 0.733596 Hz  
AQ 1.3631488 sec  
RG 197.77  
DW 20.800 usec  
DE 6.50 usec  
TE 294.3 K  
D1 2.00000000 sec  
D11 0.03000000 sec  
TD0 1  
SFO1 100.6404331 MHz  
NUC1 13C  
P1 10.00 usec  
PLW1 47.00000000 W  
SFO2 400.2016008 MHz  
NUC2 1H  
CPDPRG[2] waltz16  
PCPD2 90.00 usec  
PLW2 13.00000000 W  
PLW12 0.29249999 W  
PLW13 0.14713000 W

F2 - Processing parameters  
SI 32768  
SF 100.6303700 MHz  
WDW EM  
SSB 0  
LB 1.00 Hz  
GB 0  
PC 1.40

Asmaa Alaa\_H\_PF2a

Microanalytical Unit - FOPCU - NMR laboratory  
www.pharma.cu.edu.eg dir-mau.fopcu@pharma.cu.edu.eg

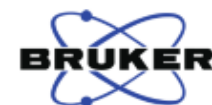

11.4856  
10.5089  
10.3815  
8.1068  
8.1044  
8.0871  
8.0846  
7.8954  
7.8771  
7.8631  
7.8595  
7.7512  
7.7311  
7.6021  
7.5838  
7.5654  
7.5305  
7.5192  
7.5152  
7.5002  
7.4821  
7.4111  
7.3944  
7.3893  
7.3703  
7.3510  
7.3109  
7.3060  
7.3032  
7.2953  
7.2893  
7.2723  
4.1193  
4.0818  
4.0075  
3.9700  
3.7782  
3.7683  
3.3515  
2.5135  
2.5092  
2.5050

Current Data Parameters  
NAME Asmaa Alaa\_H\_PF2a  
EXPNO 10  
PROCNO 1

F2 - Acquisition Parameters  
Date\_ 20170215  
Time 15.01  
INSTRUM spect  
PROBHD 5 mm PABBO BB/  
PULPROG zg30  
TD 65536  
SOLVENT DMSO  
NS 32  
DS 2  
SWH 8012.820 Hz  
FIDRES 0.122266 Hz  
AQ 4.0894465 sec  
RG 129.43  
DW 62.400 usec  
DE 6.50 usec  
TE 296.1 K  
D1 1.00000000 sec  
TDO 1

----- CHANNEL f1 -----  
SFO1 400.1924713 MHz  
NUC1 1H  
P1 15.00 usec  
PLW1 10.39999962 W

F2 - Processing parameters  
SI 65536  
SF 400.1900000 MHz  
WDW EM  
SSB 0  
LB 0.30 Hz  
GB 0  
PC 1.00

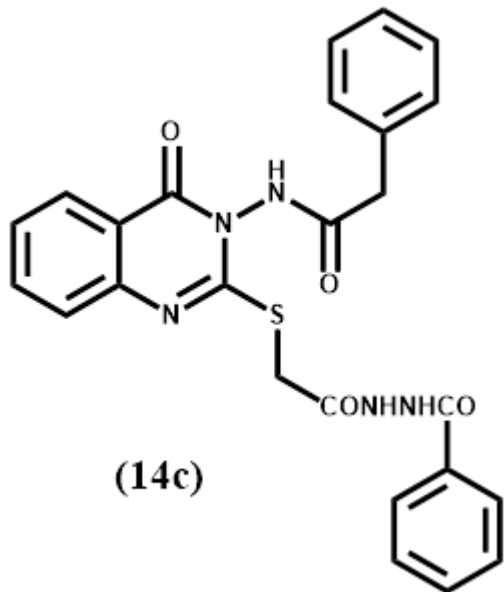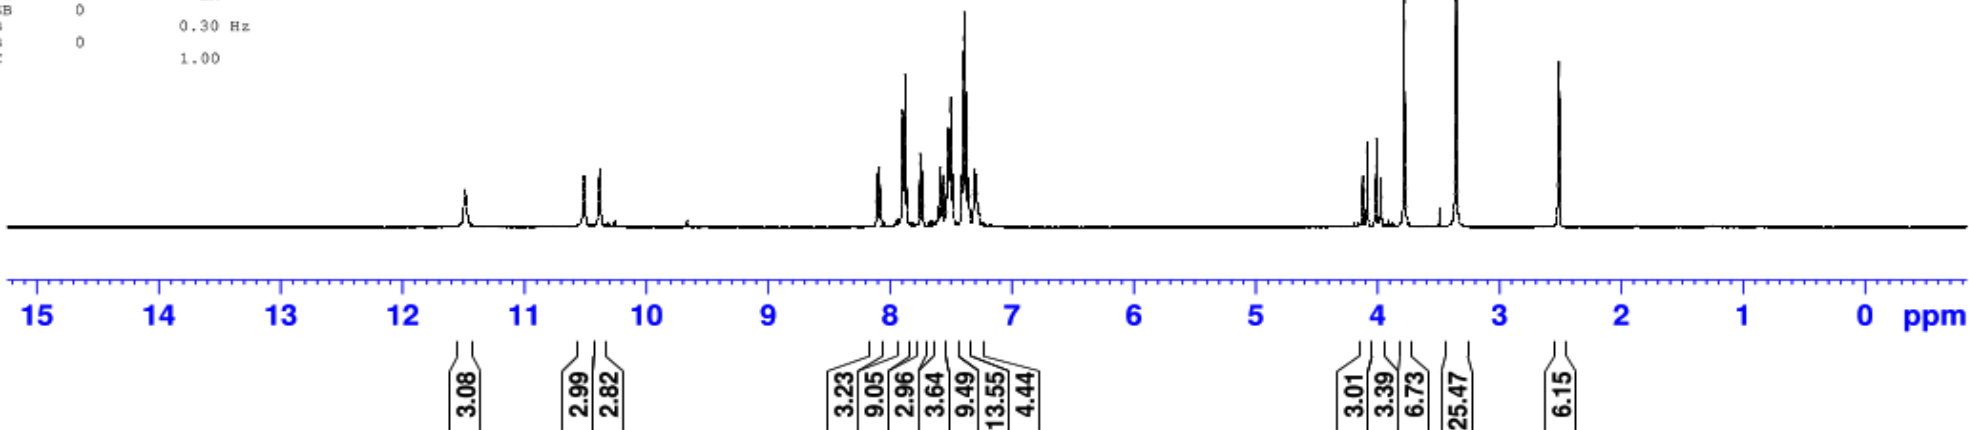

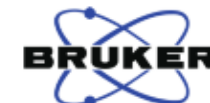

8.0819  
 8.0622  
 7.8788  
 7.8503  
 7.8325  
 7.8296  
 7.7409  
 7.7205  
 7.5940  
 7.5766  
 7.5583  
 7.5240  
 7.5060  
 7.4875  
 7.4689  
 7.3707  
 7.3556  
 7.2813  
 4.0793  
 4.0411  
 3.9697  
 3.9320  
 3.7728  
 2.5119

Current Data Parameters  
 NAME Asmaa Alaa\_H\_PF2a\_D20  
 EXPNO 10  
 PROCNO 1

F2 - Acquisition Parameters  
 Date\_ 20170216  
 Time 14.31  
 INSTRUM spect  
 PROBHD 5 mm PABBO BB/  
 PULPROG zg30  
 TD 65536  
 SOLVENT DMSO  
 NS 32  
 DS 2  
 SWH 8012.820 Hz  
 FIDRES 0.122266 Hz  
 AQ 4.0894465 sec  
 RG 129.43  
 DW 62.400 usec  
 DE 6.50 usec  
 TE 298.0 K  
 D1 1.0000000 sec  
 TD0 1

===== CHANNEL f1 =====  
 SF01 400.1924713 MHz  
 NUC1 1H  
 P1 15.00 usec  
 PLW1 10.39999962 W

F2 - Processing parameters  
 SI 65536  
 SF 400.1900000 MHz  
 WDW EM  
 SSB 0  
 LB 0.30 Hz  
 GB 0  
 PC 1.00

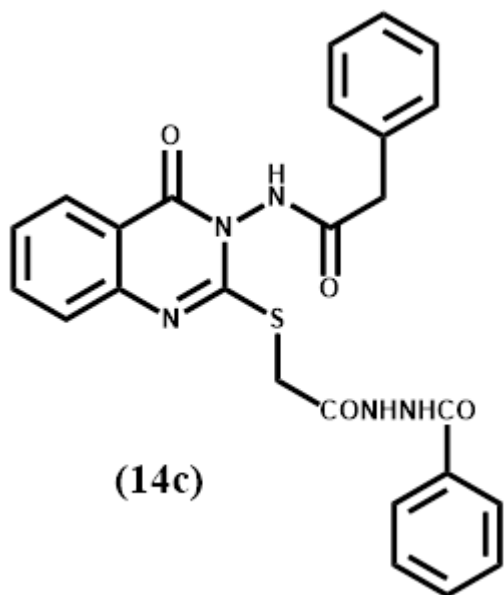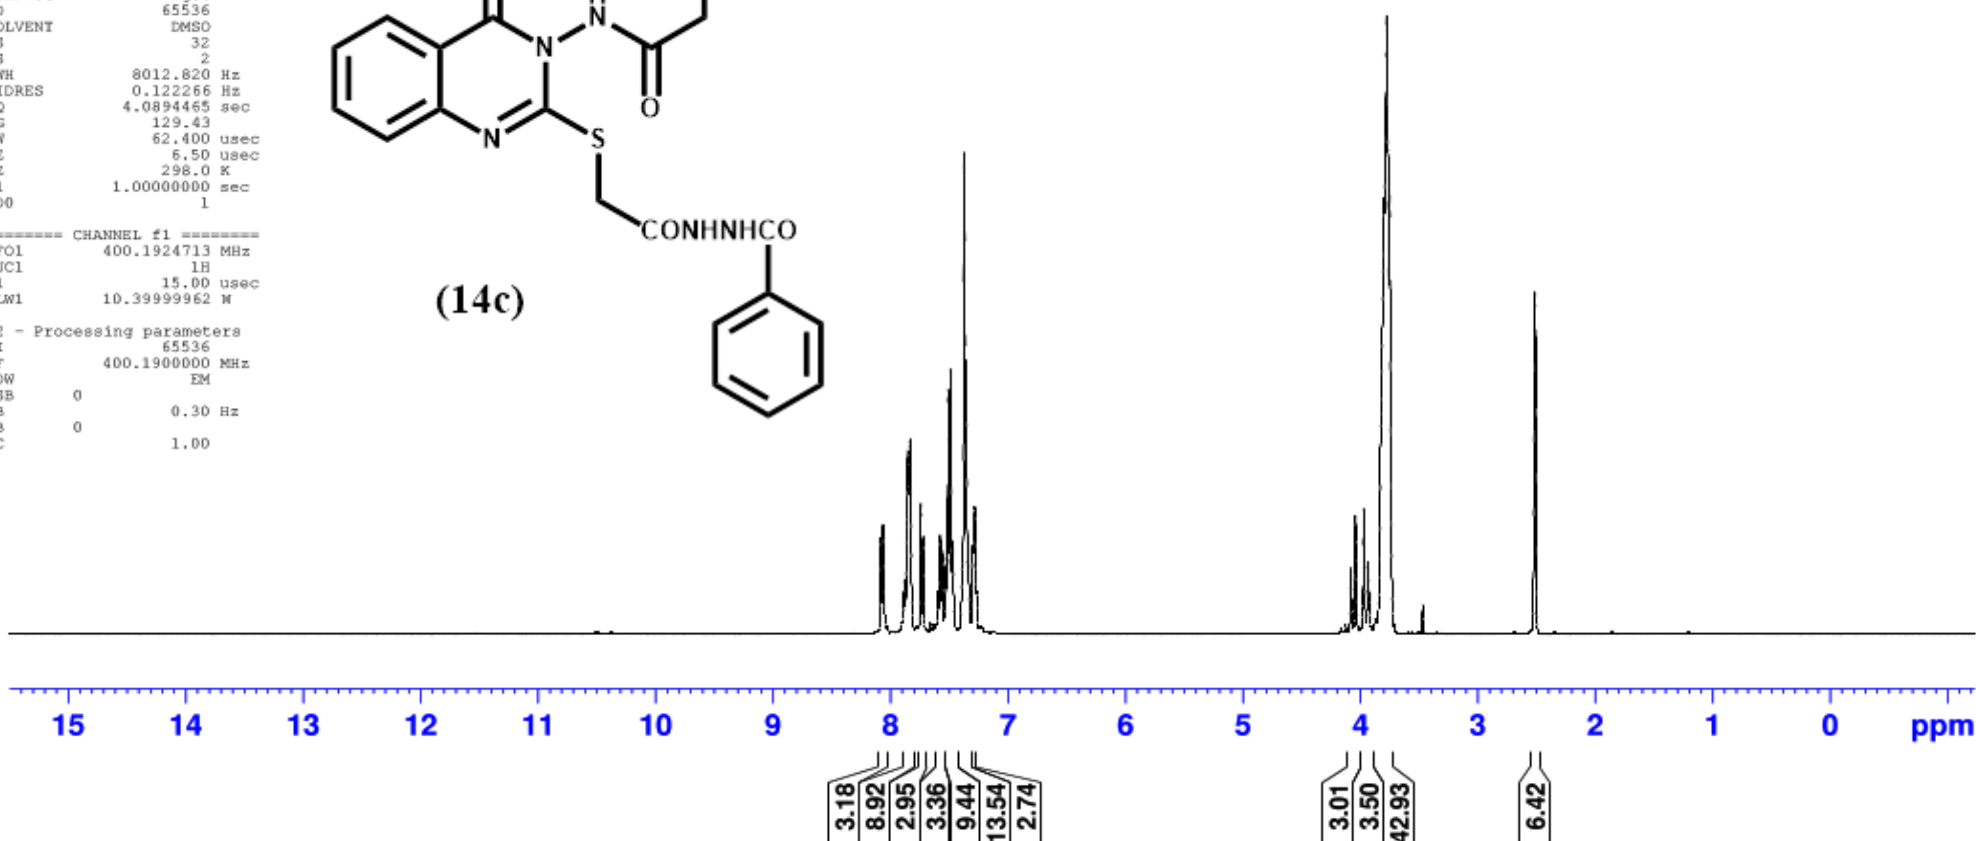

asmaa sakr- pf2a- carbon

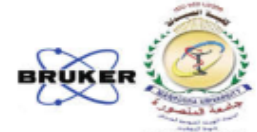

Current Data Parameters  
NAME asmaa sakr-pf2a-SS  
EXPNO 10  
PROCNO 1

F2 - Acquisition Parameters  
Date\_ 20180428  
Time 12.47 h  
INSTRUM spect  
PROBHD Z108618\_0945 (  
PULPROG zgpg30  
TD 65536  
SOLVENT DMSO  
NS 1024  
DS 4  
SWH 24038.461 Hz  
FIDRES 0.733596 Hz  
AQ 1.3631488 sec  
RG 197.77  
DW 20.800 usec  
DE 6.50 usec  
TE 294.0 K  
D1 2.00000000 sec  
D11 0.03000000 sec  
TD0 1  
SFO1 100.6404331 MHz  
NUC1 13C  
P1 10.00 usec  
PLW1 47.00000000 W  
SFO2 400.2016008 MHz  
NUC2 1H  
CPDPRG[2] waltz16  
PCPD2 90.00 usec  
PLW2 13.00000000 W  
PLW12 0.29249999 W  
PLW13 0.14713000 W

F2 - Processing parameters  
SI 32768  
SF 100.6303700 MHz  
WDW EM  
SSB 0  
LB 1.00 Hz  
GB 0  
PC 1.40

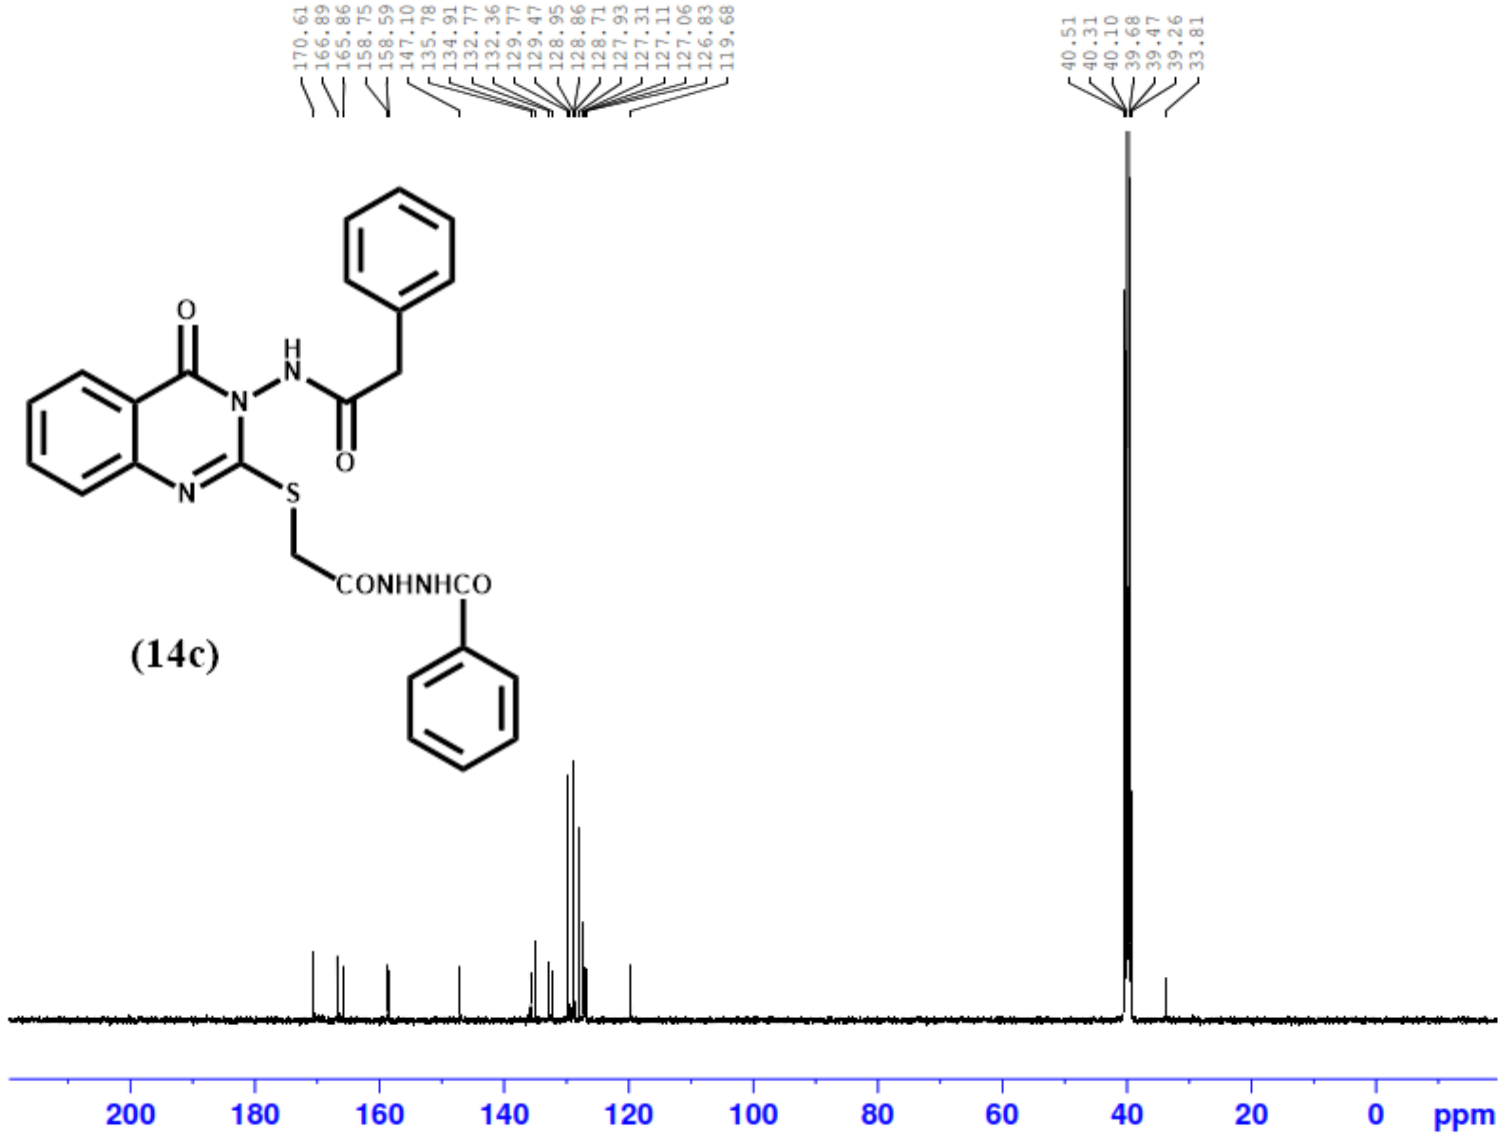

Current Data Parameters  
NAME Asmaa Alaa\_H\_PO6  
EXPNO 10  
PROCNO 1

F2 - Acquisition Parameters  
Date\_ 20180527  
Time 22.37  
INSTRUM spect  
PROBHD 5 mm F4001 QNP  
PULPROG zgpg30  
TD 65536  
SOLVENT DMSO  
NS 32  
DS 2  
SWH 801.220 MHz  
FIDRES 0.122266 Hz  
AQ 4.0894465 sec  
RG 180.8  
DW 62.400 usec  
DE 6.50 usec  
TE 298.0 K  
D1 1.00000000 sec  
TD0 1

----- CHANNEL f1 -----  
SFO1 400.1924713 MHz  
NUC1 1H  
P1 15.00 usec  
PLW1 10.39999962 W

F2 - Processing parameters  
SI 65536  
SF 400.1900000 MHz  
WDW EM  
SSB 0  
LB 0.30 Hz  
GB 0  
PC 1.00

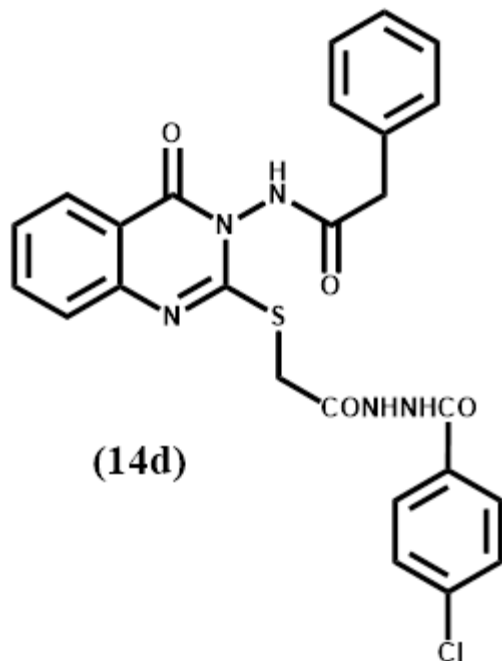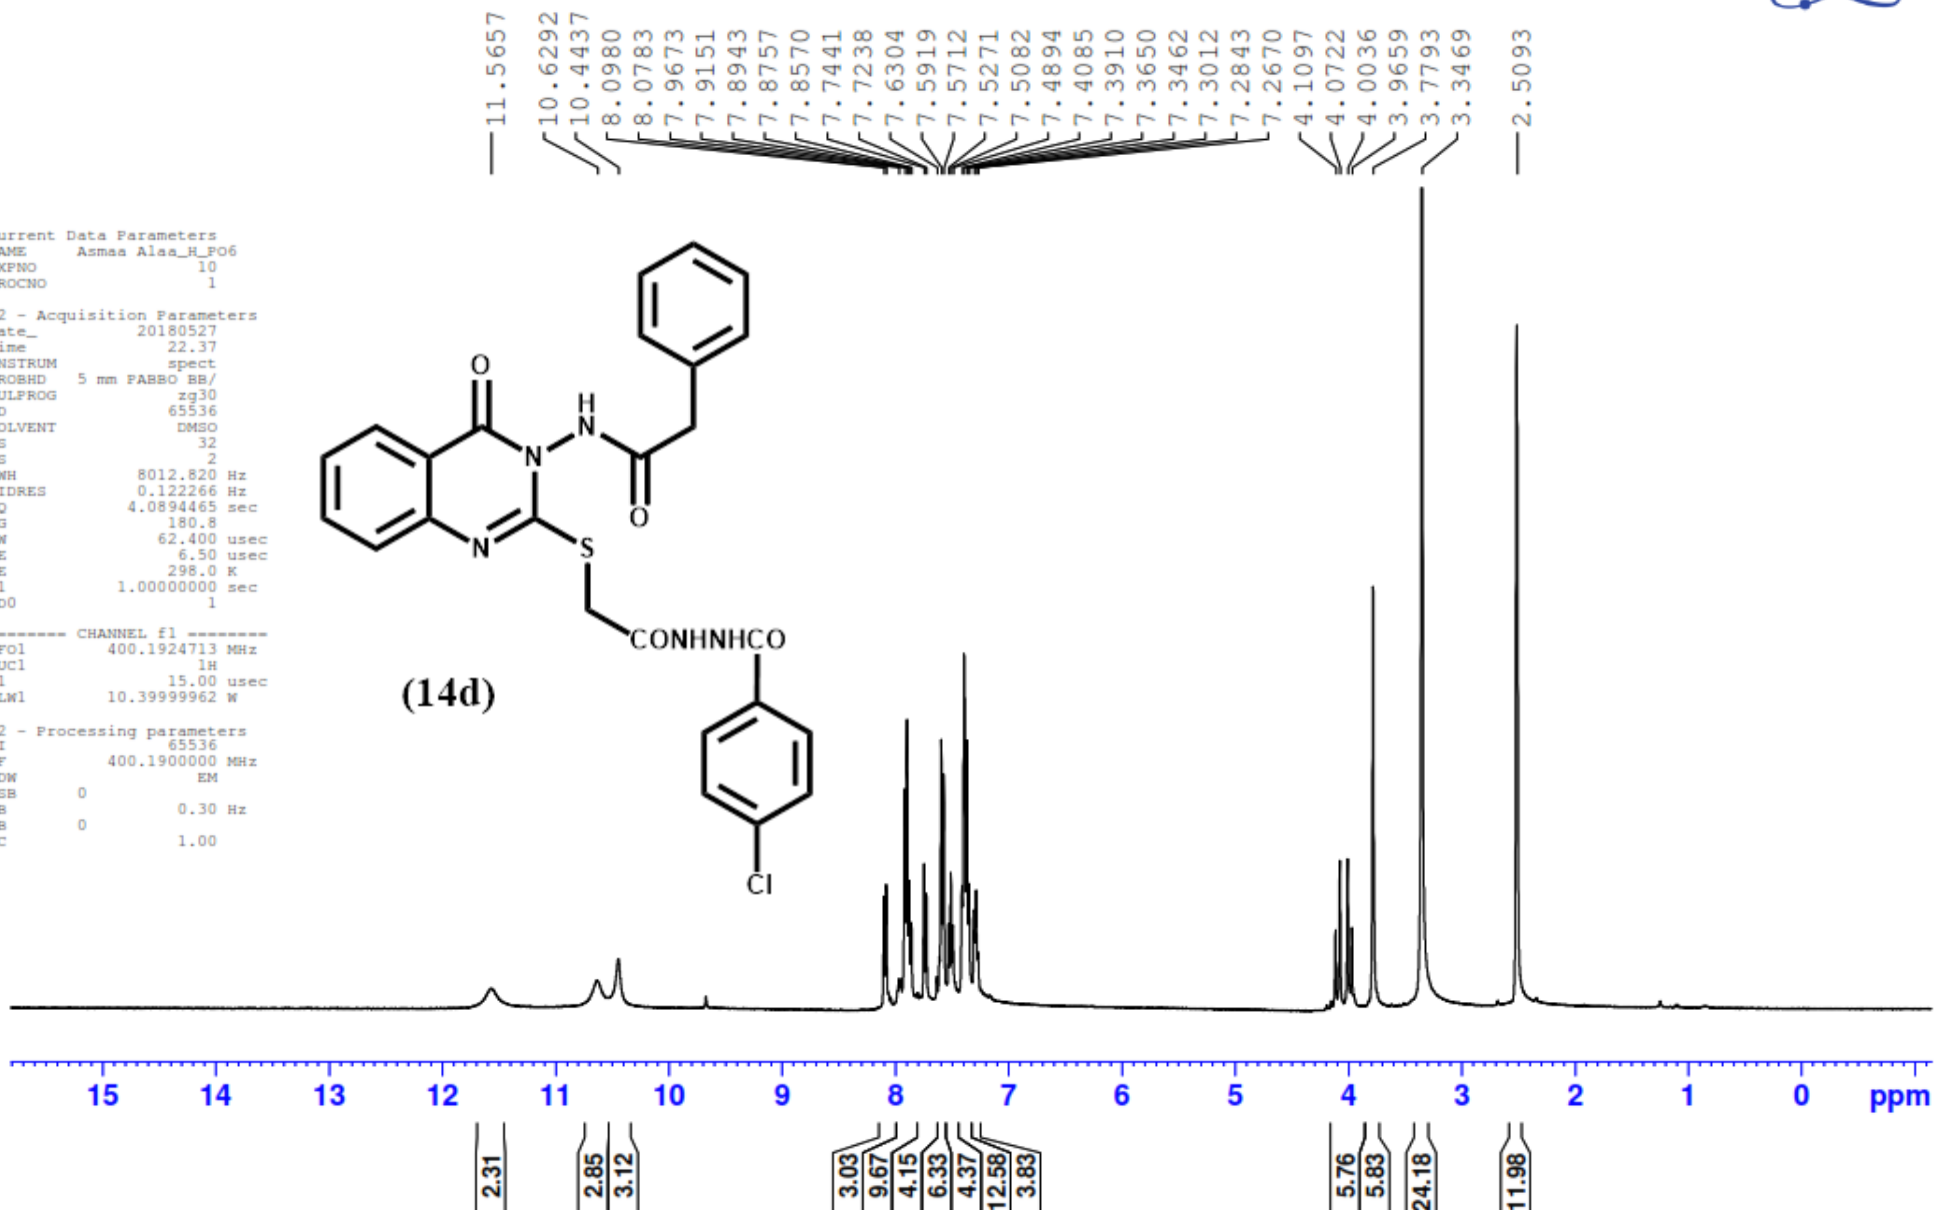

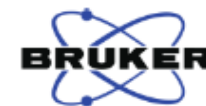

Current Data Parameters  
NAME Asmaa Alaa\_H\_PO6\_D2O  
EXPNO 10  
PROCNO 1

F2 - Acquisition Parameters  
Date\_ 20180529  
Time 12.39  
INSTRUM spect  
PROBHD 5 mm PABBO BB/  
PULPROG zg30  
TD 65536  
SOLVENT DMSO  
NS 32  
DS 2  
SWH 8012.820 Hz  
FIDRES 0.122266 Hz  
AQ 4.0894465 sec  
RG 180.8  
DW 62.400 usec  
DE 6.50 usec  
TE 298.1 K  
D1 1.00000000 sec  
TDO 1

----- CHANNEL f1 -----  
SF01 400.1924713 MHz  
NUC1 1H  
P1 15.00 usec  
PLW1 10.39999962 W

F2 - Processing parameters  
SI 65536  
SF 400.1900000 MHz  
WDM EM  
SSB 0  
LB 0.30 Hz  
GB 0  
PC 1.00

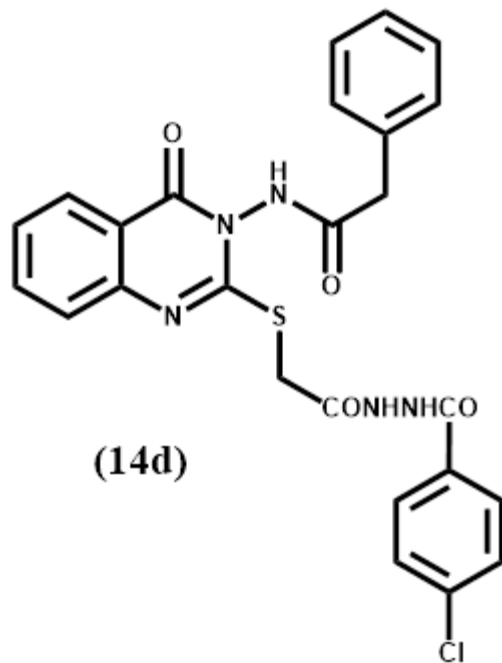

8.0647  
8.0448  
7.8642  
7.8426  
7.8303  
7.8096  
7.7273  
7.7070  
7.5444  
7.5233  
7.4961  
7.4771  
7.3578  
7.3435  
7.3247  
7.2869  
7.2727  
3.9908  
3.9412  
3.7312  
2.5123

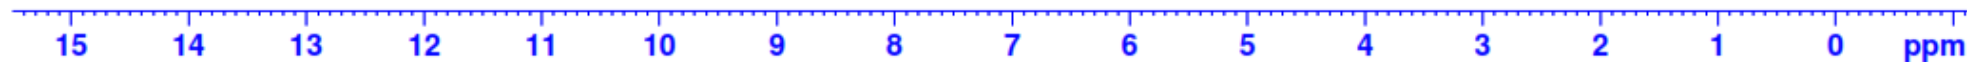

2.70  
8.25  
3.02  
9.01  
13.98

46.61  
5.70

10.74

asmaa sakr- po6-carbon

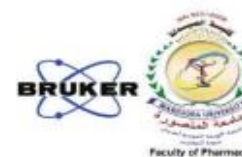

170.59  
166.85  
164.81  
158.70  
158.63  
147.09  
137.16  
135.74  
134.99  
131.54  
129.91  
129.79  
129.15  
129.07  
128.83  
127.27  
127.11  
127.04  
126.80  
119.69

40.54  
40.33  
40.12  
39.92  
39.71  
39.50  
39.29  
33.80

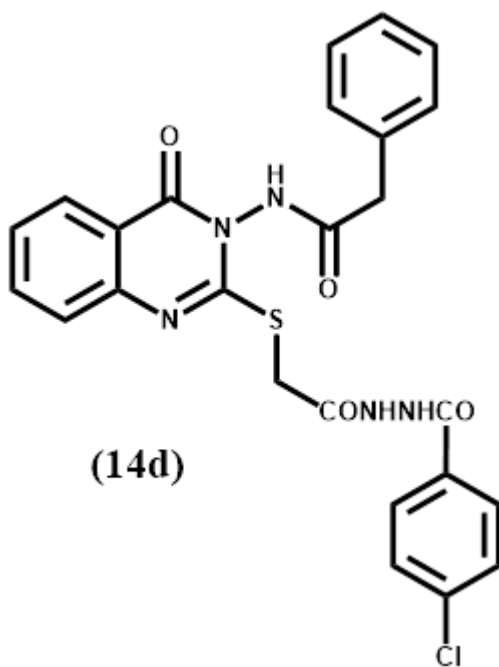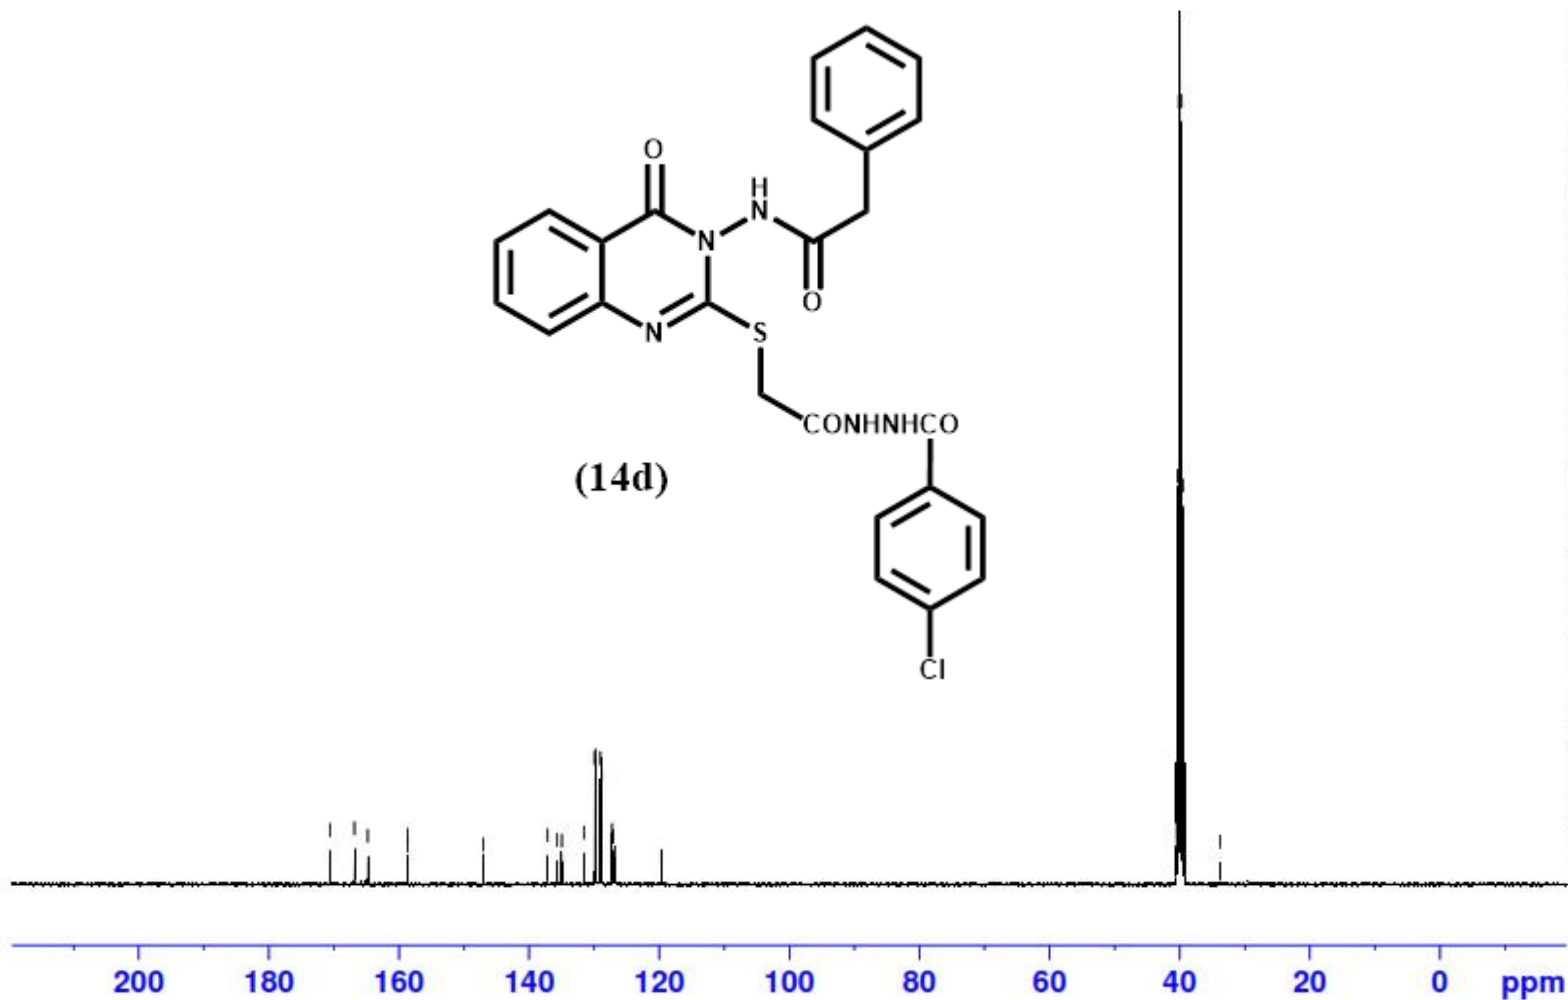

Current Data Parameters  
NAME asmaasakr-po6-SS  
EXPNO 10  
PROCNO 1

F2 - Acquisition Parameters  
Date\_ 20180505  
Time 11.55 h  
INSTRUM spect  
PROBHD Z108618\_0945 (   
PULPROG zgpg30  
ID 65536  
SOLVENT DMSO  
NS 1024  
DS 4  
SWH 24038.461 Hz  
FIDRES 0.733596 Hz  
AQ 1.3631488 sec  
RG 197.77  
DW 20.800 usec  
DE 6.50 usec  
TE 294.1 K  
D1 2.00000000 sec  
D11 0.03000000 sec  
TD0 1  
SFO1 100.6404331 MHz  
NUC1 13C  
P1 10.00 usec  
PLW1 47.00000000 W  
SFO2 400.2016008 MHz  
NUC2 1H  
CPDPRG[2] waltz16  
PCPD2 90.00 usec  
PLW2 13.00000000 W  
PLW12 0.29249999 W  
PLW13 0.14713000 W

F2 - Processing parameters  
SI 32768  
SF 100.6303700 MHz  
WDW EM  
SSB 0  
LB 1.00 Hz  
GB 0  
PC 1.40



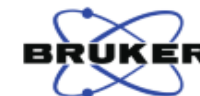

— 11.2257  
 8.9501  
 8.9289  
 8.1274  
 8.1241  
 8.1079  
 8.1046  
 7.8831  
 7.8793  
 7.8614  
 7.8434  
 7.8396  
 7.5393  
 7.5200  
 7.5016  
 7.4029  
 7.3824  
 7.3644  
 7.3451  
 7.3016  
 7.2847  
 7.2677  
 5.8476  
 3.7470  
 3.5727  
 3.3448  
 2.5132  
 2.5092

Current Data Parameters  
 NAME Asmaa Alaa\_H\_PF2  
 EXPNO 10  
 PROCNO 1

F2 - Acquisition Parameters  
 Date\_ 20170215  
 Time 14.56  
 INSTRUM spect  
 PROBHD 5 mm PABBO BB/  
 PULPROG zg30  
 TD 65536  
 SOLVENT DMSO  
 NS 32  
 DS 2  
 SWH 8012.820 Hz  
 FIDRES 0.122266 Hz  
 AQ 4.0894465 sec  
 RG 146.06  
 DW 62.400 usec  
 DE 6.50 usec  
 TE 298.1 K  
 D1 1.00000000 sec  
 TDO 1

Unexpected compound

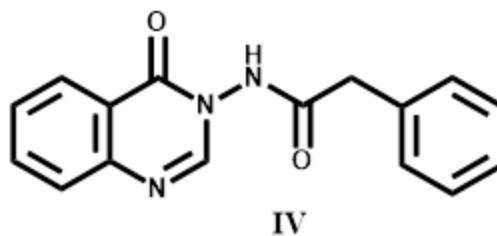

----- CHANNEL f1 -----  
 SFO1 400.1924713 MHz  
 NUC1 1H  
 P1 15.00 usec  
 PLW1 10.39999962 W

F2 - Processing parameters  
 SI 65536  
 SF 400.1900000 MHz  
 WDM EM  
 SSB 0  
 LB 0.30 Hz  
 GB 0  
 PC 1.00

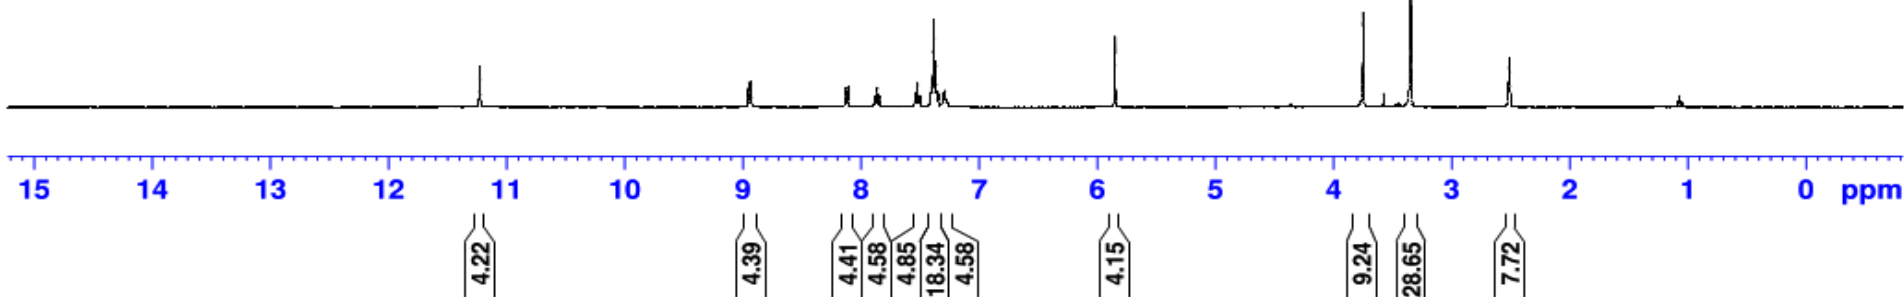

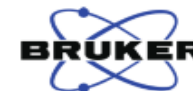

Current Data Parameters  
 NAME Asmaa Alaa\_H\_PF2\_D2O  
 EXPNO 10  
 PROCNO 1

F2 - Acquisition Parameters  
 Date\_ 20170216  
 Time 14.26  
 INSTRUM spect  
 PROBHD 5 mm PABBO BB/  
 PULPROG zg30  
 TD 65536  
 SOLVENT DMSO  
 NS 32  
 DS 2  
 SWH 8012.820 Hz  
 FIDRES 0.122266 Hz  
 AQ 4.0894465 sec  
 RG 146.06  
 DE 62.400 usec  
 TE 298.1 K  
 D1 1.00000000 sec  
 TD0 1

----- CHANNEL f1 -----  
 SFO1 400.1924713 MHz  
 NUC1 1H  
 P1 15.00 usec  
 PLW1 10.39999962 W

F2 - Processing parameters  
 SI 65536  
 SF 400.1900000 MHz  
 WDM EM  
 SSB 0  
 LB 0.30 Hz  
 GB 0  
 PC 1.00

8.9201  
 8.1017  
 7.8483  
 7.5149  
 7.3650  
 5.8060  
 3.7896  
 3.5584  
 3.4365  
 2.5159  
 1.0551

Unexpected compound

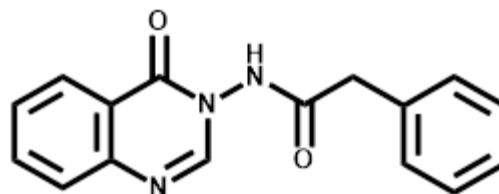

IV

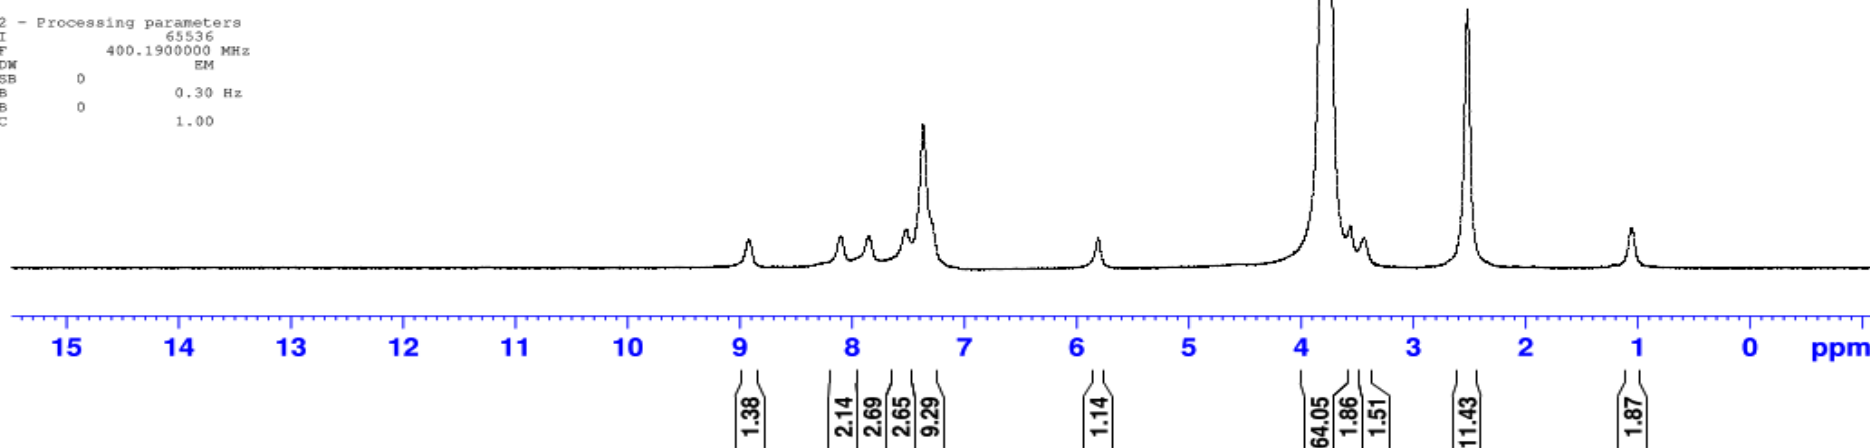



**Table.1:** Molecular docking details of target compounds with both (1CX2 and 1EQG):

| Code       | Docking of target compounds and <b>1CX2</b> |                        |                           |                         | Docking of target compounds and <b>1EQG</b> |                                            |                           |                         |
|------------|---------------------------------------------|------------------------|---------------------------|-------------------------|---------------------------------------------|--------------------------------------------|---------------------------|-------------------------|
|            | Number of bonds                             | Type of bond           | Docking scores (Kcal/mol) | Amino acid interactions | Number of bonds                             | Type of bond                               | Docking scores (Kcal/mol) | Amino acid interactions |
| <b>4a</b>  | 1                                           | 1 HB <sup>a</sup>      | -6.2604                   | Ala527                  | 1                                           | 1 HB <sup>a</sup>                          | -5.9148                   | Arg120                  |
| <b>4b</b>  | 1                                           | 1 arene-H <sup>b</sup> | -7.0540                   | Ser353                  | 2                                           | 2 HB <sup>a</sup>                          | -4.2701                   | Tyr355, Val116          |
| <b>7c</b>  | 1                                           | 2 HB <sup>a</sup>      | -6.9140                   | Val523, Arg120          | -                                           | -                                          | -6.4143                   | -                       |
| <b>13b</b> | 1                                           | 1 HB <sup>a</sup>      | -8.4080                   | Arg120                  | 2                                           | 1 HB <sup>a</sup> , 1 arene-H <sup>b</sup> | -2.0562                   | Arg120, Tyr355          |

|                  |   |                                                |         |                                            |   |                  |         |                |
|------------------|---|------------------------------------------------|---------|--------------------------------------------|---|------------------|---------|----------------|
| <b>14c</b>       | 3 | 3 HB <sup>a</sup>                              | -8.5355 | Arg513,<br>Gly354, Ser353                  | 1 | 1HB <sup>a</sup> | -6.3893 | Arg120         |
| <b>SC-558</b>    | 5 | 4 HB <sup>a</sup> , 1 arene-<br>H <sup>b</sup> | -9.3983 | Ty355, Arg120,<br>Arg513, His90,<br>ser353 | - | -                | -1.3609 | -              |
| <b>Ibuprofen</b> |   |                                                |         |                                            | 3 | HB <sup>a</sup>  |         | Arg120, Tyr355 |

\* <sup>a</sup> (HB) is symbol for hydrogen bond, <sup>b</sup> (arene-H); arene group attached with hydrogen bond.

**Table.2:** predict bioavailability using online website (MOLINSPIRATION): [www.molinspiration.com](http://www.molinspiration.com)

| Code         | Log p | M.WT   | nON (HBA) | nOHNH<br>(HBD) | LIPINSK'S<br>VIOLATION | TPSA   | %ABS  | VOLUMES | NROTB |
|--------------|-------|--------|-----------|----------------|------------------------|--------|-------|---------|-------|
| 4a           | 4.57  | 444.92 | 6         | 2              | 0                      | 68.44  | 85.39 | 384.66  | 4     |
| 4b           | 3.85  | 455.47 | 9         | 2              | 0                      | 114.26 | 69.58 | 394.46  | 5     |
| 7c           | 5.80  | 486.57 | 8         | 1              | 1                      | 98.47  | 75.03 | 448.82  | 7     |
| 13b          | 0.51  | 383.43 | 8         | 4              | 0                      | 119.12 | 41.09 | 325.43  | 6     |
| 14c          | 2.75  | 487.54 | 9         | 3              | 0                      | 122.19 | 66.84 | 416.94  | 8     |
| Celecoxib    | 3.61  | 381.38 | 5         | 2              | 0                      | 77.99  | 82.09 | 298.65  | 4     |
| Ibuprofen    | 3.46  | 206.28 | 2         | 1              | 0                      | 37.30  | 96.13 | 211.19  | 4     |
| indomethacin | 3.99  | 357.79 | 5         | 1              | 0                      | 68.54  | 85.35 | 303.24  | 4     |

7c Lipinski violation was Log p which must be <5 or equal and in this compound it >5 log p= 5.80

Reference for equation:

<https://www.ncbi.nlm.nih.gov/pubmed/12425461>

The values of TPSA are used to calculate the percentage of oral absorption (%ABS) using the following equation:

$$\%ABS = 109 - 0.345 \text{ TPSA}$$

**Table.3:** Results of prediction of drug cell permeability, intestinal, BBB and PPB using Pre-ADMET calculator.

| code                | Caco2 | MDCK   | HIA   | BBB  | PPB    |
|---------------------|-------|--------|-------|------|--------|
| <b>4a</b>           | 34.04 | 0.42   | 93.96 | 4.07 | 90.25  |
| <b>4b</b>           | 19.75 | 0.08   | 92.79 | 0.31 | 90.57  |
| <b>7c</b>           | 21.15 | 0.06   | 96.97 | 0.05 | 90.37  |
| <b>13b</b>          | 12.58 | 1.79   | 91.51 | 0.08 | 88.69  |
| <b>14c</b>          | 11.24 | 0.07   | 93.56 | 0.03 | 100.00 |
| <b>Celecoxib</b>    | 0.499 | 45.05  | 96.69 | 0.03 | 91.07  |
| <b>Ibuprofen</b>    | 21.21 | 136.48 | 98.38 | 1.27 | 88.25  |
| <b>indomethacin</b> | 20.14 | 3.81*  | 98.44 | 0.03 | 78.06  |

All compounds showed the same results as 3 reference drugs (Celecoxib, Ibuprofen and indomethacin) as **non**-inhibitor activity for (CYP2D6 enzyme),so they will be expected to not included in any Drug-Drug interaction for both inhibitors and/or inducers of that enzyme.
